# Supplementary material for: A DFT study of endocyclic allenes: unprecedentedly superbasic hydrocarbons
Source: Royal Society of Chemistry journal article supplement (doi:10.1039/c6nj00623j), 2016-01-01
Supplement: c6nj00623j1.pdf [file c6nj00623j1.pdf]

## Supporting Information

### A DFT study of endocyclic allenes - unprecedentedly superbasic hydrocarbons

Davor Margetić,\* and Ivana Antol

*Ruđer Bošković Institute, Bijenička cesta 54, HR-10002 Zagreb, Croatia*

#### 1. Computational details

##### Computational Details

All geometrical optimizations were carried out employing B3LYP hybrid functional DFT method (Becke's 3 parameter functional with the non-local correlation provided by the expression of Lee *et al.*)<sup>1</sup> as well as M052X<sup>2</sup> and M062X<sup>3</sup> hybrid functionals of Truhlar and Zhao employing 6-31G\* basis set. Calculations were performed using *Gaussian03* suite of programs,<sup>4</sup> implemented on dual core Opteron 240 personal computer under Linux operating system and computer cluster Isabella at the Computing center of the University of Zagreb (Isabella computer cluster (24 dual processor HP ProLiant BLP20p nodes with Intel Xeon 2.8 GHz, 32 dual processor Dell 1850 1U nodes with Intel Xeon 3.4 GHz and 24 dual processor Pyramid GX28 nodes with AMD Opteron 248). Harmonic vibration frequencies were calculated for all localized stationary structures to verify minima by no possession of imaginary vibrations. Single point calculations were conducted using B3LYP/6-311+G\*\*//B3LYP//6-31G\* method, and the gas phase basicity (GB) were calculated as the Gibbs free energy change of the protonation reaction. Throughout the manuscript, B3LYP<sup>5</sup> denotes PA calculated at B3LYP/6-31G\*+ $E_{\text{vib}}$ (B3LYP/6-31G\*), while B3LYP(2)<sup>6</sup> denotes the PA obtained at the B3LYP/6-311+G\*\*//B3LYP/6-31G\*+ $E_{\text{vib}}$ (B3LYP/6-31G\*) level. Likewise, notation for M052X, M052X(2), M062X and M062X(2) was applied. Hybridization, Wiberg and BOAO bond orders were obtained from NBO analysis incorporated within *Gaussian03* program using pop=nboread keyword.

Proton affinity of allenes in the gas phase ( $\text{PA}_{\text{B3LYP}(2)}$ ) was calculated using the following equations:<sup>6</sup>

$$\text{PA}(\text{B}) = \Delta E_{\text{el}} + \Delta \text{ZPVE}_{\text{B3LYP}} \quad (1)$$

$$\Delta E_{\text{el}} = E(\text{B})_{\text{B3LYP}(2)} - E(\text{BH}^+)_{\text{B3LYP}(2)} \quad (2)$$

$$\Delta \text{ZPVE}_{\text{B3LYP}} = \text{ZPVE}(\text{B})_{\text{B3LYP}} - \text{ZPVE}(\text{BH}^+)_{\text{B3LYP}} \quad (3)$$

Here B3LYP denotes B3LYP/6-31G\* level; while B3LYP(2) is B3LYP/6-311+G\*\*//B3LYP/6-31G\* model. Similarly, PA<sub>M052X(2)</sub> and PA<sub>M062X(2)</sub> were obtained.

Gas phase basicities (GB) of allenes are defined as a negative value of the free energy change for the protonation reaction.

The solvent effect in acetonitrile was estimated by employing the polarized continuum model at IPCM/B3LYP/6-311+G\*\* //B3LYP//6-31G\* level.<sup>7</sup> The molecular surface determining a cavity within a solvent is obtained by the isodensity shell of 0.0004eB<sup>-3</sup>, thus giving rise to the isodensity polarized continuum model (IPCM)<sup>8</sup> utilizing dielectric constant for acetonitrile  $\epsilon = 36.64$ . Estimation of PA and pK<sub>a</sub> values in acetonitrile was achieved by using the equations derived for guanidines:<sup>9</sup>

$$pK_a = 0.4953PA(B_{MeCN}) - 119.7 \text{ units} \quad (4)$$

$$PA(B_{MeCN}) = \Delta E_{el MeCN} + \Delta ZPVE_{B3LYP} \quad (5)$$

$$\Delta E_{el MeCN} = E(B)_{MeCN} - E(BH^+)_{MeCN} \quad (6)$$

$$\Delta ZPVE_{B3LYP} = ZPVE(B)_{B3LYP} - ZPVE(BH^+)_{B3LYP} \quad (7)$$

In these equations MeCN denotes IPCM/B3LYP/6-311+G\*\*//B3LYP/6-31G\* model and B3LYP denotes B3LYP/6-31G\* method, hence  $PA_{MeCN} = IPCM/6-311+G^{**}/B3LYP/6-31G^* + E_{vib}(B3LYP/6-31G^*)$ .<sup>10</sup>

Table SI-1. Geometrical parameters (B3LYP/6-31G\*)

| Base      | C <sub>1</sub> =C <sub>2</sub><br>Distance /Å | C <sub>1</sub> =C <sub>2</sub> =C <sub>3</sub><br>Angle / ° | C <sub>1</sub> =C <sub>2</sub> =C <sub>3</sub> -C <sub>4</sub><br>Angle / ° | C <sub>1</sub> / C <sub>2</sub> / C <sub>3</sub><br>p hybridization <sup>a</sup> | Bond order<br>Wiberg | Bond order<br>BOAO |
|-----------|-----------------------------------------------|-------------------------------------------------------------|-----------------------------------------------------------------------------|----------------------------------------------------------------------------------|----------------------|--------------------|
| <b>1</b>  | 1.330                                         | 145.9                                                       | 27.0                                                                        | 1.80 / 1.09                                                                      | 1.8091               | 1.3521             |
| <b>2</b>  | 1.332                                         | 145.2                                                       | 25.8/26.9                                                                   | 1.80 / 1.09 / 1.80                                                               | 1.8023/ 1.8004       | 1.3452/ 1.3473     |
| <b>3</b>  | 1.332                                         | 144.9                                                       | 26.4/26.5                                                                   | 1.80 / 1.09 / 1.80                                                               | 1.8027/ 1.7964       | 1.3454/ 1.3458     |
| <b>4</b>  | 1.337/1.347                                   | 139.4                                                       | 27.4/23.2                                                                   | 1.68 / 1.15 / 1.76                                                               | 1.6483/1.8037        | 1.2965/ 1.3387     |
| <b>5</b>  | 1.336/1.346                                   | 139.5                                                       | 23.7/27.2                                                                   | 1.68 / 1.15 / 1.76                                                               | 1.6545/ 1.8059       | 1.2994/ 1.3401     |
| <b>6</b>  | 1.334/1.338                                   | 144.0                                                       | 26.6/25.3                                                                   | 1.81 / 1.10 / 1.79                                                               | 1.7654/ 1.7998       | 1.3279/ 1.3442     |
| <b>7</b>  | 1.331/1.337                                   | 143.5                                                       | 25.8/27.8                                                                   | 1.80 / 1.10 / 1.82                                                               | 1.8081/ 1.7545       | 1.3491/ 1.3262     |
| <b>8</b>  | 1.351/1.337                                   | 138.3                                                       | 23.2/25.7                                                                   | 1.68 / 1.16 / 1.74                                                               | 1.6302/ 1.7902       | 1.2871/ 1.3341     |
| <b>9</b>  | 1.365/1.350                                   | 138.8                                                       | 24.3/24.9                                                                   | 1.70 / 1.16 / 1.74                                                               | 1.6243/ 1.8063       | 1.2833/ 1.3420     |
| <b>10</b> | 1.363                                         | 130.8                                                       | 21.4/21.5                                                                   | 1.67 / 1.22 / 1.67                                                               | 1.6001/ 1.6000       | 1.2630/ 1.2630     |
| <b>11</b> | 1.362/1.365                                   | 131.9                                                       | 20.6/21.4                                                                   | 1.66 / 1.23 / 1.67                                                               | 1.6046/ 1.5824       | 1.2677/ 1.255      |
| <b>12</b> | 1.359                                         | 131.2                                                       | 20.9/20.2                                                                   | 1.64 / 1.20 / 1.62                                                               | 1.6340/ 1.657        | 1.2768 /1.2890     |
| <b>13</b> | 1.353                                         | 135.1                                                       | 27.9/28.1                                                                   | 1.62 / 1.21 / 1.62                                                               | 1.6141/ 1.6138       | 1.2998/ 1.2996     |
| <b>14</b> | 1.349/1.355                                   | 137.8                                                       | 19.3/33.9                                                                   | 1.68 / 1.08 / 1.65                                                               | 1.6533/ 1.6301       | 1.3111/ 1.3017     |
| <b>15</b> | 1.375                                         | 128.7                                                       | 19.7/23.8                                                                   | 1.69 / 1.29 / 1.70                                                               | 1.5105/ 1.5075       | 1.2312/1.2297      |
| <b>16</b> | 1.333/1.335                                   | 146.4                                                       | 17.8/19.4                                                                   | 1.79 / 1.06 / 1.80                                                               | 1.6577/ 1.6452       | 1.3183/1.3113      |
| <b>17</b> | 1.336/1.338                                   | 144.5                                                       | 18.0/19.8                                                                   | 1.78 / 1.08 / 1.79                                                               | 1.6541/ 1.6420       | 1.3119/ 1.3051     |
| <b>18</b> | 1.339/1.343                                   | 142.6                                                       | 18.3/19.9                                                                   | 1.77 / 1.09 / 1.78                                                               | 1.6555/ 1.6285       | 1.3094/1.2956      |
| <b>19</b> | 1.349/1.352                                   | 136.1                                                       | 18.4/20.6                                                                   | 1.68 / 1.16 / 1.69                                                               | 1.6302/ 1.6209       | 1.2798/ 0.9349     |

<sup>a</sup> 1.80 denotes sp<sup>1.80</sup>

Table SI-2. Gas phase proton affinities, basicities (kcal mol<sup>-1</sup>) and pK<sub>a</sub> values

| Base      | B3LYP                        |                                 |                              |                    |                 | M052X                             |                   |                    |                 | M062X                             |                   |                    |                 |
|-----------|------------------------------|---------------------------------|------------------------------|--------------------|-----------------|-----------------------------------|-------------------|--------------------|-----------------|-----------------------------------|-------------------|--------------------|-----------------|
|           | PA <sub>B</sub> <sup>a</sup> | PA <sub>B(2)</sub> <sup>b</sup> | GB <sub>B</sub> <sup>c</sup> | PA <sub>MeCN</sub> | pK <sub>a</sub> | PA <sub>M05(2)</sub> <sup>d</sup> | GB <sub>M05</sub> | PA <sub>MeCN</sub> | pK <sub>a</sub> | PA <sub>M06(2)</sub> <sup>e</sup> | GB <sub>M06</sub> | PA <sub>MeCN</sub> | pK <sub>a</sub> |
| <b>1</b>  | 263.9                        | 262.5                           | 257.8                        | 305.9              | 31.8            | 251.2                             | 250.4             | 299.4              | 28.6            | 249.2                             | 248.5             | 297.7              | 27.7            |
| <b>2</b>  | 276.2                        | 269.3                           | 270.0                        | 312.5              | 35.0            | 263.1                             | 262.2             | 305.7              | 31.7            | 261.2                             | 260.4             | 304.1              | 30.9            |
| <b>3</b>  | 279.9                        | 273.3                           | 273.8                        | 311.5              | 34.6            | 266.6                             | 265.4             | 304.4              | 31.1            | 265.0                             | 264.0             | 303.1              | 30.4            |
| <b>4</b>  | 281.3                        | 274.4                           | 275.1                        | 317.2              | 37.4            | 269.6                             | 268.9             | 312.2              | 34.9            | 267.6                             | 266.9             | 310.5              | 34.1            |
| <b>5</b>  | 284.4                        | 277.6                           | 278.3                        | 315.4              | 36.5            | 272.4                             | 271.5             | 310.0              | 33.9            | 271.3                             | 269.9             | 308.6              | 33.1            |
| <b>6</b>  | 285.5                        | 278.7                           | 279.3                        | 317.7              | 37.7            | 272.7                             | 271.7             | 311.3              | 34.5            | 270.8                             | 269.9             | 317.4              | 37.5            |
| <b>7</b>  | 290.5                        | 284.0                           | 284.1                        | 316.3              | 37.0            | 278.0                             | 276.3             | 314.3              | 36.0            | 276.7                             | 275.1             | 308.5              | 33.1            |
| <b>8</b>  | 290.3                        | 287.7                           | 284.1                        | 317.7              | 37.7            | 279.5                             | 279.4             | 318.3              | 38.0            | 277.3                             | 275.9             | 316.5              | 37.1            |
| <b>9</b>  | 294.5                        | 288.4                           | 288.6                        | 327.6              | 42.6            | 284.2                             | 282.7             | 320.1              | 38.8            | 282.8                             | 281.6             | 314.4              | 36.0            |
| <b>10</b> | 293.6                        | 286.2                           | 287.3                        | 323.5              | 40.5            | 283.7                             | 283.5             | 321.1              | 39.3            | 281.9                             | 281.2             | 319.7              | 38.6            |
| <b>11</b> | 299.4                        | 291.9                           | 293.1                        | 326.2              | 41.8            | 290.2                             | 289.6             | 324.1              | 40.8            | 287.9                             | 287.5             | 322.6              | 40.1            |
| <b>12</b> | 300.5                        | 292.8                           | 294.1                        | 327.4              | 42.5            | 290.8                             | 290.6             | 325.6              | 41.5            | 289.1                             | 288.8             | 324.3              | 40.9            |
| <b>13</b> | 284.7                        | 278.7                           | 278.1                        | 315.2              | 36.4            | 275.9                             | 275.4             | 311.3              | 34.5            | 274.9                             | 273.6             | 313.3              | 35.5            |
| <b>14</b> | 287.2                        | 280.3                           | 280.6                        | 308.2              | 33.0            | 277.1                             | 276.4             | 308.4              | 33.0            | 282.8                             | 274.9             | 311.1              | 34.4            |
| <b>15</b> | 322.5                        | 313.5                           | 316.1                        | 338.6              | 48.0            | 310.6                             | 311.7             | 334.4              | 45.9            | 308.7                             | 309.7             | 329.9              | 43.7            |
| <b>16</b> | 330.1                        | 321.9                           | 323.5                        | 352.2              | 54.7            | 317.7                             | 317.3             | 346.5              | 51.9            | 314.7                             | 308.5             | 338.3              | 47.9            |
| <b>17</b> | 337.0                        | 329.0                           | 330.8                        | 352.5              | 54.9            | 326.1                             | 325.9             | 346.8              | 52.1            | 323.7                             | 324.2             | 346.9              | 52.1            |
| <b>18</b> | 358.8                        | 350.9                           | 352.7                        | 363.5              | 60.3            | 347.7                             | 348.0             |                    |                 | 345.0                             | 345.7             |                    |                 |
| <b>19</b> | 327.4                        | 318.5                           | 320.7                        | 334.7              | 46.1            | 302.9                             | 302.8             | 319.0              | 38.3            | 301.4                             | 301.5             | 337.8              | 47.6            |

<sup>a</sup> PA<sub>B3LYP</sub>: B3LYP/6-31G\*+*E*<sub>vib</sub>(B3LYP/6-31G\*)<sup>8</sup>; <sup>b</sup> PA<sub>B3LYP(2)</sub>: B3LYP/6-311+G\*\*//B3LYP/6-31G\*+ *E*<sub>vib</sub>(B3LYP/6-31G\*)<sup>9</sup>; <sup>c</sup> B3LYP/6-31G\*; <sup>d</sup> PA<sub>M052X(2)</sub>: M052X/6-311+G\*\*//M052X/6-31G\*+*E*<sub>vib</sub>(M052X/6-31G\*); <sup>e</sup> PA<sub>M062X(2)</sub>: M062X/6-311+G\*\*//M062X/6-31G\*+*E*<sub>vib</sub>(M062X/6-31G\*)

## 2. Cartesian coordinates

**B3LYP**

**Neutral**

**Allene 1 B3LYP/6-31G\***

|   |   |           |           |           |
|---|---|-----------|-----------|-----------|
| 0 | 1 |           |           |           |
| C |   | 1.294469  | 0.202020  | 0.695157  |
| C |   | 0.268624  | 0.182214  | 1.600695  |
| C |   | -1.038023 | -0.341047 | 1.225494  |
| C |   | 1.293502  | -0.202061 | -0.697405 |
| C |   | -1.429149 | -0.000261 | 0.001037  |
| C |   | 0.266194  | -0.182626 | -1.601175 |
| C |   | -1.039467 | 0.341408  | -1.223605 |
| H |   | 2.272248  | 0.494638  | 1.077814  |
| H |   | 0.471568  | 0.489010  | 2.627731  |
| H |   | -1.588582 | -1.015407 | 1.879953  |
| H |   | 2.270908  | -0.493650 | -1.081762 |
| H |   | 0.467410  | -0.489558 | -2.628515 |
| H |   | -1.590451 | 1.017086  | -1.876405 |

**Allene 2 B3LYP/6-31G\***

|   |   |             |             |             |
|---|---|-------------|-------------|-------------|
| 0 | 1 |             |             |             |
| C |   | 0.37374500  | -0.62317400 | -0.09514400 |
| C |   | 0.53444400  | 0.75839100  | -0.09982600 |
| C |   | -0.57635700 | 1.64222100  | -0.41342700 |
| C |   | -0.80950300 | -1.40932200 | -0.31313200 |
| C |   | -1.74555500 | 1.25424300  | 0.09209300  |
| C |   | -2.11894400 | -1.06408200 | -0.08838700 |
| C |   | -2.46481200 | 0.21435200  | 0.51286400  |
| H |   | -0.45398500 | 2.48865000  | -1.08864500 |
| H |   | -0.62946500 | -2.43487200 | -0.63798300 |
| H |   | -2.89081600 | -1.80807800 | -0.28869100 |
| H |   | -3.21451800 | 0.27671300  | 1.30150800  |
| C |   | 1.94893300  | 1.08036200  | 0.10725900  |
| H |   | 2.33755700  | 2.09258200  | 0.15074900  |
| C |   | 2.66278500  | -0.05865900 | 0.21571900  |
| H |   | 3.73349000  | -0.13965300 | 0.36692700  |
| C |   | 1.74633900  | -1.24416900 | 0.08396900  |
| H |   | 1.79533600  | -1.90412700 | 0.96331700  |
| H |   | 2.01594600  | -1.87219900 | -0.77910300 |

**Allene 3 B3LYP/6-31G\***

|   |   |             |             |             |
|---|---|-------------|-------------|-------------|
| 0 | 1 |             |             |             |
| C |   | -0.76155100 | -0.05084600 | -0.16660800 |
| C |   | -1.44423500 | 1.15097700  | -0.02061500 |
| C |   | -2.87212700 | 1.24744000  | -0.27576700 |
| C |   | -1.28254400 | -1.34956800 | -0.49401100 |
| C |   | -3.57828800 | 0.20776400  | 0.16394700  |
| C |   | -2.53731600 | -1.85820100 | -0.26239700 |
| C |   | -3.53966000 | -1.09158100 | 0.45876100  |
| H |   | -3.29034000 | 2.06700400  | -0.85968000 |
| H |   | -0.56251800 | -2.04586200 | -0.92418400 |
| H |   | -2.73752700 | -2.88892000 | -0.55816500 |
| H |   | -4.15496000 | -1.55717700 | 1.22844300  |
| C |   | -0.48402600 | 2.21469000  | 0.27602600  |
| H |   | -0.76126100 | 3.25086200  | 0.44186100  |
| C |   | 0.76177200  | 1.70467700  | 0.29630800  |
| H |   | 1.67180100  | 2.26327200  | 0.48300700  |
| C |   | 0.73900200  | 0.21775200  | 0.00013100  |
| C |   | 1.52519600  | -0.10171700 | -1.30730700 |
| H |   | 1.14181000  | 0.52325800  | -2.12236800 |
| H |   | 1.32726200  | -1.14544100 | -1.58816200 |
| C |   | 1.33722000  | -0.61589000 | 1.17224800  |
| H |   | 0.81910500  | -0.35407800 | 2.10219600  |
| H |   | 1.12481000  | -1.67708300 | 0.98258400  |
| C |   | 3.04333700  | 0.08134300  | -1.15138200 |
| H |   | 3.54028700  | -0.20540400 | -2.08705300 |
| H |   | 3.27578200  | 1.14347300  | -0.99295800 |
| C |   | 2.85485200  | -0.43130500 | 1.32566900  |
| H |   | 3.21981200  | -1.07785900 | 2.13394100  |
| H |   | 3.07513600  | 0.60020400  | 1.63432400  |
| C |   | 3.59728700  | -0.74515900 | 0.01848400  |
| H |   | 3.48436600  | -1.81511300 | -0.21173500 |
| H |   | 4.67291600  | -0.56338200 | 0.13704800  |

**Allene 4 B3LYP/6-31G\***

|   |   |             |             |             |
|---|---|-------------|-------------|-------------|
| 0 | 1 |             |             |             |
| C |   | -0.52974300 | 0.64907100  | 0.26065800  |
| C |   | -0.44579800 | -0.77769400 | -0.02110500 |
| C |   | 0.69498000  | -1.43872200 | 0.25402500  |
| C |   | 0.53359600  | 1.48964900  | 0.07427100  |
| C |   | 1.99865400  | -1.18932400 | 0.41494900  |
| C |   | 1.87228900  | 1.14753600  | -0.35115600 |
| C |   | 2.55110600  | -0.04087100 | -0.28403500 |
| H |   | 2.63169900  | -1.77258900 | 1.08597400  |
| H |   | 3.56521600  | -0.07468700 | -0.68555300 |
| C |   | -1.78281400 | -1.20523700 | -0.44471100 |
| H |   | -2.01401300 | -2.20166100 | -0.80530000 |
| C |   | -2.66859100 | -0.21526800 | -0.21735600 |
| H |   | -3.74125200 | -0.28194900 | -0.36647300 |
| C |   | -1.99767000 | 1.02144300  | 0.35465300  |
| H |   | -2.33469100 | 1.20583000  | 1.38772400  |

|   |             |            |             |
|---|-------------|------------|-------------|
| H | -2.22131900 | 1.93535500 | -0.21088100 |
| H | 0.33179100  | 2.55942400 | 0.12467400  |
| H | 2.42651400  | 1.98678400 | -0.77132300 |

**Allene 5 B3LYP/6-31G\***

|     |             |             |             |
|-----|-------------|-------------|-------------|
| 0 1 |             |             |             |
| C   | -0.69020800 | -0.16449400 | 0.03649100  |
| C   | -1.41558800 | 1.06533000  | -0.25609400 |
| C   | -2.66741000 | 1.22444200  | 0.21131100  |
| C   | -1.32648900 | -1.37524000 | 0.07789300  |
| C   | -3.70703900 | 0.48787800  | 0.61371800  |
| C   | -2.73476000 | -1.65193900 | -0.10989500 |
| C   | -3.83093300 | -0.84701100 | 0.05128500  |
| H   | -0.70151500 | -2.26540200 | 0.12914600  |
| H   | -4.40778200 | 0.82339900  | 1.38016300  |
| H   | -2.94195900 | -2.68112900 | -0.40357400 |
| H   | -4.81440100 | -1.26992200 | -0.16015100 |
| C   | -0.46903600 | 1.96195100  | -0.92156700 |
| H   | -0.73886900 | 2.92272200  | -1.34718600 |
| C   | 0.77484000  | 1.45674700  | -0.82017300 |
| H   | 1.67355500  | 1.95618800  | -1.16561800 |
| C   | 0.81030400  | 0.10977600  | -0.09202100 |
| C   | 1.55774400  | -0.98040200 | -0.90277400 |
| H   | 1.11974800  | -1.05581700 | -1.90517800 |
| H   | 1.39943500  | -1.95202400 | -0.41422100 |
| C   | 1.48203600  | 0.24795900  | 1.30974400  |
| H   | 0.98530200  | 1.04677800  | 1.87269700  |
| H   | 1.30577500  | -0.68592900 | 1.86224100  |
| C   | 3.07161200  | -0.72573000 | -0.99091900 |
| H   | 3.26388500  | 0.18356100  | -1.57724400 |
| H   | 3.54681000  | -1.54912400 | -1.53925500 |
| C   | 3.70296700  | -0.58107500 | 0.40166200  |
| C   | 2.99439500  | 0.50363700  | 1.22604300  |
| H   | 3.18068400  | 1.48854600  | 0.77550600  |
| H   | 3.41399700  | 0.54576000  | 2.23927500  |
| H   | 4.77340300  | -0.35629500 | 0.31343200  |
| H   | 3.62731700  | -1.54228000 | 0.93173500  |

**Allene 6 B3LYP/6-31G\***

|     |             |             |             |
|-----|-------------|-------------|-------------|
| 0 1 |             |             |             |
| C   | -0.70111300 | -0.46556500 | -0.05527500 |
| C   | -1.58525600 | 0.59343300  | 0.15267200  |
| C   | -1.14134000 | 1.90077600  | 0.56986100  |
| C   | 0.73364700  | -0.45071500 | 0.01947700  |
| C   | -0.00979300 | 2.32942700  | -0.00108500 |
| C   | 1.60352100  | 0.62031700  | -0.16340000 |
| C   | 1.13054800  | 1.93357300  | -0.56785900 |
| H   | -1.67210300 | 2.45740100  | 1.34335900  |
| H   | 1.64631000  | 2.49793100  | -1.34526400 |

|   |             |             |             |
|---|-------------|-------------|-------------|
| C | -3.00272500 | 0.08616300  | 0.03519500  |
| H | -3.58393800 | 0.28146500  | 0.94993700  |
| C | -2.82369500 | -1.38415600 | -0.23012400 |
| H | -3.64494000 | -2.07767100 | -0.37237600 |
| C | -1.51062700 | -1.67989100 | -0.27070000 |
| H | -1.08746300 | -2.66305600 | -0.44911500 |
| C | 1.57463100  | -1.69170600 | 0.25581000  |
| H | 1.33181200  | -2.18679100 | 1.20790100  |
| H | 1.40871200  | -2.44735300 | -0.52728900 |
| C | 2.98334500  | 0.14759400  | -0.01801800 |
| H | 3.85270000  | 0.79050100  | -0.11013200 |
| C | 2.98847000  | -1.17813200 | 0.22563900  |
| H | 3.85946200  | -1.80814800 | 0.36781400  |
| H | -3.54822100 | 0.58900600  | -0.77798300 |

### Allene 7 B3LYP/6-31G\*

0 1

|   |             |             |             |
|---|-------------|-------------|-------------|
| C | 1.20292700  | 0.83211500  | -0.09279600 |
| C | 1.49426700  | 2.19550100  | -0.08359500 |
| C | 0.49284200  | 3.21868100  | -0.33829900 |
| C | -0.10353000 | 0.21917600  | -0.18463800 |
| C | -0.66871000 | 3.01607900  | 0.27823900  |
| C | -1.33581500 | 0.76861600  | 0.18756800  |
| C | -1.46306400 | 2.07047800  | 0.79119700  |
| H | 0.68490500  | 4.03815600  | -1.03091200 |
| H | -2.12458800 | 2.24218900  | 1.64079100  |
| C | 2.92818700  | 2.38850300  | 0.12186400  |
| H | 3.40129700  | 3.36357300  | 0.18094000  |
| C | 3.53497300  | 1.19347300  | 0.21849400  |
| H | 4.59727100  | 1.02970800  | 0.35712400  |
| C | 2.53770600  | 0.06612600  | 0.02531000  |
| C | 2.91444600  | -0.68473500 | -1.29566100 |
| H | 2.99086200  | 0.04646400  | -2.10871500 |
| H | 2.11008000  | -1.37320100 | -1.57155600 |
| C | 2.54234600  | -0.92643100 | 1.22247500  |
| H | 2.36112200  | -0.36869400 | 2.14898400  |
| H | 1.70109500  | -1.62230300 | 1.10811300  |
| C | 4.21630600  | -1.49383100 | -1.17042800 |
| H | 4.38802500  | -2.04406800 | -2.10459300 |
| H | 5.07186400  | -0.81498300 | -1.05330800 |
| C | 3.84605700  | -1.73364500 | 1.32749800  |
| H | 3.76217500  | -2.45235100 | 2.15282200  |
| H | 4.67915200  | -1.06548100 | 1.58642100  |
| C | 4.16846500  | -2.46647500 | 0.01707700  |
| H | 3.39671400  | -3.22847300 | -0.16971800 |
| H | 5.12086200  | -3.00441400 | 0.10604200  |
| C | -2.45994000 | -0.23521300 | -0.01952800 |
| C | -0.38378800 | -1.17699600 | -0.58670900 |
| H | 0.36685600  | -1.88624600 | -0.90896700 |
| C | -1.69939200 | -1.44398000 | -0.51063100 |



|   |             |             |             |
|---|-------------|-------------|-------------|
| H | -2.16363600 | -2.39058400 | -0.76369400 |
| C | -3.46662500 | 0.29871700  | -1.08394100 |
| H | -2.93922300 | 0.45133300  | -2.03276500 |
| C | -3.22427100 | -0.52419400 | 1.30511500  |
| H | -2.53019200 | -0.94841200 | 2.04021200  |
| C | -4.43421500 | -1.45074200 | 1.10475500  |
| H | -4.09099200 | -2.44941900 | 0.80024700  |
| H | -4.95361500 | -1.58298900 | 2.06263600  |
| C | -4.67802700 | -0.62520000 | -1.27915500 |
| H | -5.36858000 | -0.17143400 | -2.00169100 |
| H | -4.35177400 | -1.57752300 | -1.72061700 |
| C | -5.40102100 | -0.89822300 | 0.04764000  |
| H | -5.84266200 | 0.03900400  | 0.41779000  |
| H | -6.23382400 | -1.59577600 | -0.10789700 |
| H | -3.81483900 | 1.28731400  | -0.75436500 |
| H | -3.57911200 | 0.43180600  | 1.71557700  |

### Allene 8 B3LYP/6-31G\*

|     |             |             |             |
|-----|-------------|-------------|-------------|
| 0 1 |             |             |             |
| C   | -0.79635600 | -0.47408000 | -0.31323000 |
| C   | -1.51942600 | 0.73176600  | 0.05515900  |
| C   | -1.00838100 | 1.95239400  | -0.21463900 |
| C   | 0.57462300  | -0.54940200 | -0.23401300 |
| C   | 0.19007300  | 2.50835900  | -0.43345500 |
| C   | 1.51975800  | 0.51380500  | 0.13318900  |
| C   | 1.37388300  | 1.87189400  | 0.11457400  |
| H   | 0.31417100  | 3.39154100  | -1.06374100 |
| H   | 2.23000900  | 2.48233500  | 0.41071800  |
| C   | -2.82966900 | 0.30531400  | 0.55916400  |
| H   | -3.56291800 | 0.98498300  | 0.97968800  |
| C   | -3.00464500 | -1.00850300 | 0.32050800  |
| H   | -3.90996300 | -1.57294100 | 0.51836800  |
| C   | -1.78437000 | -1.62667500 | -0.33747800 |
| H   | -2.02146500 | -1.98280900 | -1.35336400 |
| H   | -1.40463100 | -2.49788100 | 0.21254400  |
| C   | 2.85013500  | -0.15903400 | 0.46302800  |
| H   | 3.69353100  | 0.29707600  | -0.07405300 |
| H   | 3.08498700  | -0.06543600 | 1.53481200  |
| C   | 1.35148700  | -1.79374600 | -0.30439600 |
| H   | 0.92552500  | -2.74311700 | -0.61142400 |
| C   | 2.62475100  | -1.59550000 | 0.07846400  |
| H   | 3.39958200  | -2.35330900 | 0.12519900  |

### Allene 9 B3LYP/6-31G\*

|     |             |            |             |
|-----|-------------|------------|-------------|
| 0 1 |             |            |             |
| C   | -1.18111500 | 0.77755200 | -0.09991900 |
| C   | -1.34009100 | 2.14355600 | 0.37537800  |
| C   | -0.49932500 | 3.12722300 | -0.01058100 |
| C   | 0.06842600  | 0.25778900 | -0.37837500 |

|   |             |             |             |
|---|-------------|-------------|-------------|
| C | 0.75213800  | 3.26271600  | -0.45430300 |
| C | 1.38244800  | 0.90221400  | -0.18294000 |
| C | 1.71437700  | 2.22501000  | -0.12400100 |
| H | 1.05685900  | 4.07488600  | -1.11767300 |
| H | 2.75893200  | 2.49322500  | 0.04005000  |
| C | -2.61317000 | 2.21628500  | 1.09089500  |
| H | -2.96055900 | 3.10219300  | 1.61198300  |
| C | -3.30866100 | 1.08555800  | 0.88550300  |
| H | -4.31912200 | 0.90690200  | 1.23578900  |
| C | -2.52797300 | 0.04682800  | 0.07997300  |
| C | 0.36566700  | -1.13546400 | -0.74112000 |
| H | -0.38276600 | -1.84036400 | -1.08058200 |
| C | 1.67409500  | -1.40753900 | -0.62128700 |
| H | 2.13131100  | -2.36552600 | -0.84269700 |
| C | 4.09664600  | -1.45564800 | 1.40444600  |
| H | 4.45794100  | -1.50755700 | 2.43955400  |
| H | 3.68112600  | -2.44665100 | 1.17353000  |
| C | 5.26095800  | -1.15234400 | 0.45023400  |
| H | 6.01524300  | -1.94754800 | 0.50440400  |
| H | 5.75903000  | -0.22603100 | 0.77334600  |
| C | 4.76916000  | -0.98036400 | -0.99439500 |
| H | 5.60418600  | -0.69884900 | -1.64859000 |
| H | 4.39762700  | -1.94326300 | -1.37205800 |
| C | 2.99037800  | -0.39359500 | 1.30370600  |
| H | 2.15174900  | -0.64520900 | 1.96349500  |
| H | 3.38649900  | 0.57153000  | 1.64971800  |
| C | 3.66554500  | 0.08565300  | -1.09122300 |
| H | 4.10139600  | 1.05653900  | -0.82293600 |
| H | 3.30664000  | 0.17801800  | -2.12337000 |
| C | 2.46142000  | -0.20372300 | -0.15149800 |
| C | -4.55655000 | -0.97485600 | -1.14664800 |
| H | -5.28700000 | -0.30901400 | -0.66648100 |
| H | -4.95701500 | -1.20118500 | -2.14315400 |
| C | -3.78316700 | -1.98561600 | 1.04731000  |
| H | -3.63775900 | -2.92533500 | 1.59551400  |
| H | -4.47191400 | -1.38210700 | 1.65396600  |
| C | -3.20912200 | -0.25050000 | -1.28923200 |
| H | -2.52944900 | -0.87586000 | -1.88537200 |
| H | -3.33411300 | 0.68866700  | -1.84095900 |
| C | -2.42869600 | -1.26769800 | 0.91083200  |
| H | -2.01717300 | -1.03498500 | 1.90015100  |
| H | -1.72446300 | -1.95790300 | 0.43650900  |
| C | -4.41962800 | -2.26357000 | -0.32307500 |
| H | -5.39894700 | -2.74263700 | -0.19742300 |
| H | -3.79083200 | -2.97873900 | -0.87479600 |

**Allene 10 B3LYP/6-31G\***

0 1

|   |           |           |           |
|---|-----------|-----------|-----------|
| C | 0.619029  | 0.282144  | -1.559582 |
| C | -0.738015 | -0.125259 | -1.233634 |

|   |           |           |           |
|---|-----------|-----------|-----------|
| C | -1.304362 | -0.000202 | -0.000005 |
| C | 1.677708  | 0.183678  | -0.693531 |
| C | -0.737944 | 0.125170  | 1.233587  |
| C | 1.677745  | -0.183866 | 0.693614  |
| C | 0.619052  | -0.282292 | 1.559649  |
| H | 2.669037  | 0.339282  | -1.119138 |
| H | 2.669103  | -0.339352 | 1.119189  |
| C | -1.364906 | -0.526214 | -2.498755 |
| H | -2.361709 | -0.949787 | -2.557996 |
| C | -0.574046 | -0.192644 | -3.537520 |
| H | -0.823865 | -0.303061 | -4.587632 |
| C | 0.719095  | 0.439891  | -3.065755 |
| H | 1.613269  | -0.057875 | -3.464331 |
| H | 0.783732  | 1.492399  | -3.387045 |
| C | 0.718964  | -0.439745 | 3.065888  |
| H | 0.783462  | -1.492201 | 3.387405  |
| H | 1.613219  | 0.057976  | 3.464339  |
| C | -1.365043 | 0.526067  | 2.498587  |
| H | -2.361934 | 0.949462  | 2.557654  |
| C | -0.573989 | 0.193216  | 3.537461  |
| H | -0.824052 | 0.303494  | 4.587530  |

**Allene 11 B3LYP/6-31G\***

|   |   |           |           |           |
|---|---|-----------|-----------|-----------|
| 0 | 1 |           |           |           |
| C |   | -0.044685 | 0.251319  | -1.567359 |
| C |   | -1.400453 | -0.138274 | -1.204159 |
| C |   | -1.947265 | -0.006489 | 0.035851  |
| C |   | 1.023849  | 0.169278  | -0.716854 |
| C |   | -1.364317 | 0.130202  | 1.262845  |
| C |   | 1.044587  | -0.177366 | 0.702766  |
| C |   | -0.007022 | -0.261316 | 1.589886  |
| C |   | -2.064533 | -0.539922 | -2.450382 |
| H |   | -3.069610 | -0.946788 | -2.477828 |
| C |   | -1.298397 | -0.226333 | -3.512228 |
| H |   | -1.576419 | -0.339933 | -4.554871 |
| C |   | 0.021368  | 0.379024  | -3.079673 |
| H |   | 0.886203  | -0.156391 | -3.494644 |
| H |   | 0.117777  | 1.421927  | -3.423683 |
| C |   | 0.105890  | -0.371047 | 3.100908  |
| H |   | 0.214022  | -1.408621 | 3.457269  |
| H |   | 0.978875  | 0.175288  | 3.482698  |
| C |   | -1.997716 | 0.538462  | 2.523106  |
| H |   | -3.002706 | 0.943289  | 2.574159  |
| C |   | -1.201849 | 0.234657  | 3.565817  |
| H |   | -1.452189 | 0.352808  | 4.614884  |
| C |   | 2.456802  | -0.320838 | 1.081021  |
| H |   | 2.778727  | -0.610032 | 2.075536  |
| C |   | 3.268501  | -0.044930 | 0.046403  |
| H |   | 4.352652  | -0.076857 | 0.061353  |
| C |   | 2.469600  | 0.320674  | -1.173884 |

|   |          |           |           |
|---|----------|-----------|-----------|
| H | 2.707488 | -0.325968 | -2.031582 |
| H | 2.679024 | 1.348673  | -1.507663 |

**Allene 12 B3LYP/6-31G\***

|   |             |             |             |
|---|-------------|-------------|-------------|
| 0 | 1           |             |             |
| C | 1.59270100  | 0.02576300  | -0.26375100 |
| C | 1.26812600  | -1.32801700 | 0.11531700  |
| C | 0.04279400  | -1.91282500 | -0.00754700 |
| C | 0.68936500  | 1.08628600  | -0.18197300 |
| C | -1.19958900 | -1.37349100 | -0.12332300 |
| C | -0.70891800 | 1.05693000  | 0.17806500  |
| C | -1.56571300 | -0.02622500 | 0.26158600  |
| C | 2.57209100  | -2.01073300 | 0.51281100  |
| H | 2.68561300  | -2.97598200 | 0.00563300  |
| C | 3.61802600  | -1.00496100 | 0.10365300  |
| H | 4.68436200  | -1.17428200 | 0.21437000  |
| C | 3.05204700  | 0.12792200  | -0.36013400 |
| C | -3.02807400 | 0.02417700  | 0.37797800  |
| C | -2.48451600 | -2.08983700 | -0.52465400 |
| H | -2.53824500 | -2.28600000 | -1.60860900 |
| C | -3.55846000 | -1.12295400 | -0.09147900 |
| H | -4.61970600 | -1.32951400 | -0.18892500 |
| H | -2.56713600 | -3.06727600 | -0.03511300 |
| H | 2.62366800  | -2.22649600 | 1.59319400  |
| H | 3.59264100  | 1.01095200  | -0.68491100 |
| H | -3.59193000 | 0.88451600  | 0.72406400  |
| C | 1.06667900  | 2.49807200  | -0.32208600 |
| H | 2.06108800  | 2.82489700  | -0.60545600 |
| C | 0.02763900  | 3.30658000  | -0.04839300 |
| H | 0.03555700  | 4.39059000  | -0.08104900 |
| C | -1.18425500 | 2.49684000  | 0.31713800  |
| H | -2.04176000 | 2.71780500  | -0.33547300 |
| H | -1.52380800 | 2.70963000  | 1.34303400  |

**Allene 13 B3LYP/6-31G\***

|   |             |             |             |
|---|-------------|-------------|-------------|
| 0 | 1           |             |             |
| C | 0.50779600  | 2.32540700  | 0.51086000  |
| C | 1.27844000  | 1.27883100  | 0.93213500  |
| C | 1.21432100  | -0.03267500 | 0.29874500  |
| C | -0.50797500 | 2.32561400  | -0.51012900 |
| C | 0.00025300  | -0.55028900 | -0.00085400 |
| C | -1.27839400 | 1.27918000  | -0.93210000 |
| C | -1.21416300 | -0.03248400 | -0.29880900 |
| H | 0.71395400  | 3.29693200  | 0.95902400  |
| H | 2.02130900  | 1.46956000  | 1.70835400  |
| H | -0.71397800 | 3.29731000  | -0.95800400 |
| H | -2.02080200 | 1.46989000  | -1.70875800 |
| N | 2.40933300  | -0.74848000 | 0.13191600  |

|   |             |             |             |
|---|-------------|-------------|-------------|
| N | -2.40888400 | -0.74798400 | -0.13054200 |
| C | 3.65224600  | -0.04361700 | -0.14370600 |
| H | 4.50076400  | -0.63419300 | 0.22190100  |
| H | 3.80128800  | 0.13055200  | -1.22397100 |
| H | 3.67039200  | 0.92457300  | 0.35707900  |
| C | 2.32448300  | -2.04864200 | -0.50874700 |
| H | 3.23586500  | -2.61654400 | -0.28839400 |
| H | 1.45169700  | -2.57822600 | -0.11954500 |
| H | 2.21639900  | -1.98006100 | -1.60426200 |
| C | -3.65280500 | -0.04414300 | 0.14262500  |
| H | -3.66854500 | 0.92615500  | -0.35411000 |
| H | -4.50020700 | -0.63292500 | -0.22855100 |
| H | -3.80594100 | 0.12563300  | 1.22299600  |
| C | -2.32441900 | -2.04859800 | 0.50903200  |
| H | -3.23465000 | -2.61734000 | 0.28588900  |
| H | -1.45004500 | -2.57679500 | 0.12153000  |
| H | -2.21934000 | -1.98077400 | 1.60488400  |

**Allene 14 B3LYP/6-31G\***

|   |             |             |             |
|---|-------------|-------------|-------------|
| 0 | 1           |             |             |
| C | 0.33338100  | 1.63392900  | -0.32222900 |
| C | 1.40704500  | 0.74488300  | -0.38753700 |
| C | 1.37896600  | -0.57511000 | 0.20686700  |
| C | -0.95728700 | 1.41335000  | 0.25715800  |
| C | 0.22619300  | -1.28644700 | 0.15744800  |
| C | -1.61538000 | 0.21159400  | 0.46986500  |
| C | -1.08822900 | -1.04903400 | -0.03564400 |
| C | 2.60990500  | 1.48991400  | -0.92719700 |
| H | 3.43405600  | 1.47402000  | -0.19887700 |
| C | 2.09149300  | 2.88019500  | -1.17003300 |
| H | 2.68940600  | 3.68467100  | -1.58353800 |
| C | 0.79708500  | 2.94501800  | -0.81081400 |
| H | 0.16190400  | 3.82280500  | -0.87289300 |
| C | -1.84698000 | 2.52880400  | 0.77651700  |
| H | -1.33732800 | 3.14708300  | 1.53010900  |
| H | -2.14367100 | 3.21917300  | -0.02813500 |
| C | -2.88474000 | 0.47529100  | 1.15948900  |
| H | -3.57470500 | -0.30384500 | 1.46573900  |
| C | -3.03502800 | 1.80159100  | 1.34597100  |
| H | -3.87049100 | 2.29817100  | 1.82669900  |
| H | 3.00520100  | 1.03542500  | -1.84813500 |
| N | 2.55605700  | -1.03859800 | 0.88515200  |
| N | -1.95524800 | -1.98275600 | -0.62102700 |
| C | 3.58624000  | -1.55760800 | -0.01612300 |
| H | 4.50000100  | -1.76180400 | 0.55371700  |
| H | 3.26979800  | -2.49136400 | -0.51657100 |
| H | 3.82814400  | -0.82639900 | -0.79040300 |
| C | 2.25677300  | -2.00400100 | 1.93543800  |
| H | 1.80543500  | -2.93321100 | 1.54520600  |
| H | 3.18475300  | -2.25392900 | 2.46137000  |

|   |             |             |             |
|---|-------------|-------------|-------------|
| H | 1.55623600  | -1.56480400 | 2.65103800  |
| C | -1.36377600 | -3.22408800 | -1.09327600 |
| H | -0.63909800 | -3.57394100 | -0.35391600 |
| H | -2.15659800 | -3.96936000 | -1.22500000 |
| H | -0.83539700 | -3.10803800 | -2.05421600 |
| C | -3.06190200 | -1.51797600 | -1.44751800 |
| H | -2.74770200 | -1.31689800 | -2.48632700 |
| H | -3.84325000 | -2.28638800 | -1.47418100 |
| H | -3.49491500 | -0.60370500 | -1.04084900 |

**Allene 15 B3LYP/6-31G\***

|     |             |             |             |
|-----|-------------|-------------|-------------|
| 0 1 |             |             |             |
| C   | 1.60457400  | 0.11550700  | -0.28243100 |
| C   | 1.19674500  | -1.24947600 | 0.06619100  |
| C   | -0.02163500 | -1.83587400 | -0.18395500 |
| C   | 0.72140400  | 1.19222300  | -0.31743800 |
| C   | -1.24210700 | -1.23313100 | -0.38317000 |
| C   | -0.70889800 | 1.20559200  | -0.07601700 |
| C   | -1.60078000 | 0.12816500  | 0.01597700  |
| C   | 2.36765400  | -1.92788900 | 0.55374900  |
| H   | 2.34129000  | -2.95066500 | 0.90726300  |
| C   | 3.48672600  | -1.14930700 | 0.37641700  |
| C   | 3.07413000  | 0.13884900  | -0.24298100 |
| C   | -3.05956600 | 0.16500400  | 0.12505400  |
| C   | -2.45744600 | -1.87711800 | -0.80938800 |
| C   | -3.54567300 | -1.08944800 | -0.50984500 |
| C   | -1.12537800 | 2.61772300  | -0.07249900 |
| H   | -2.15171800 | 2.93890100  | 0.03393500  |
| C   | -0.08497500 | 3.43765900  | -0.28462700 |
| H   | -0.12531000 | 4.51928300  | -0.35357600 |
| C   | 1.16748900  | 2.64042400  | -0.48041600 |
| H   | 1.96254800  | 2.91106800  | 0.22864500  |
| H   | 1.57784900  | 2.82624700  | -1.48468600 |
| C   | 3.89174000  | 1.13111900  | -0.73172700 |
| H   | 3.40335400  | 1.95382900  | -1.24164900 |
| C   | 5.30636500  | 1.23582400  | -0.69746100 |
| C   | 6.25583500  | 0.36695900  | -0.16424900 |
| C   | 4.83344000  | -1.54208000 | 0.71178600  |
| C   | 6.03423200  | -0.88477800 | 0.48239600  |
| H   | -2.48054500 | -2.89004500 | -1.19101200 |
| C   | -4.92370800 | -1.44390800 | -0.73639000 |
| C   | -6.08437200 | -0.79668500 | -0.33188600 |
| C   | -3.80127000 | 1.10647200  | 0.80246200  |
| H   | -3.23736800 | 1.86868200  | 1.33367500  |
| C   | -5.20695700 | 1.21070700  | 0.94560900  |
| C   | -6.21883800 | 0.39210200  | 0.44331600  |
| C   | -5.31236500 | -2.64169300 | -1.49333600 |
| H   | -4.60091600 | -3.32748400 | -1.93758000 |
| C   | -6.65366600 | -2.73983700 | -1.55882600 |
| H   | -7.22016300 | -3.51743000 | -2.05873100 |

|   |             |             |             |
|---|-------------|-------------|-------------|
| C | -7.50816700 | 0.95528100  | 0.86347900  |
| H | -8.46831300 | 0.51921300  | 0.60930300  |
| C | -7.31813800 | 2.06783900  | 1.60031400  |
| H | -8.09005400 | 2.68646100  | 2.04382600  |
| C | 5.13297500  | -2.80268000 | 1.40586300  |
| H | 4.37588800  | -3.51225300 | 1.71711900  |
| C | 6.45956100  | -2.92775700 | 1.59913000  |
| H | 6.96560700  | -3.75264200 | 2.08794400  |
| C | 7.58393100  | 0.95421500  | -0.38213400 |
| H | 8.50980900  | 0.48680300  | -0.06437400 |
| C | 7.47657000  | 2.13340500  | -1.02612900 |
| H | 8.29237000  | 2.78410000  | -1.31985300 |
| C | 7.16432400  | -1.73152700 | 1.03264200  |
| H | 7.88568600  | -2.01523400 | 0.25064300  |
| H | 7.74670400  | -1.19755100 | 1.79948700  |
| C | 6.02977800  | 2.42850100  | -1.29099900 |
| H | 5.71178700  | 3.37504100  | -0.82672000 |
| H | 5.82357900  | 2.53852700  | -2.36722100 |
| C | -5.84844100 | 2.33891700  | 1.72879800  |
| H | -5.52180600 | 2.34367500  | 2.78050600  |
| H | -5.57596700 | 3.32705200  | 1.32645800  |
| C | -7.27797600 | -1.58838300 | -0.82842600 |
| H | -7.91873600 | -1.93071600 | -0.00108600 |
| H | -7.92830300 | -0.99034500 | -1.48544500 |

**Allene 16 B3LYP/6-31G\***

|     |             |             |             |
|-----|-------------|-------------|-------------|
| 0 1 |             |             |             |
| C   | -1.60631000 | 0.31630400  | 0.30764800  |
| C   | -1.26496600 | -1.08565200 | -0.09811900 |
| C   | 0.01206400  | -1.45818900 | -0.01736100 |
| C   | -0.68421000 | 1.38739200  | 0.17737400  |
| C   | 1.28262200  | -1.06051500 | 0.07473800  |
| C   | 0.67918100  | 1.40456500  | -0.20194100 |
| C   | 1.62273600  | 0.33479200  | -0.31478200 |
| C   | -2.48266700 | -1.80816200 | -0.42369700 |
| H   | -2.51764500 | -2.85038800 | -0.71435100 |
| C   | -3.51808700 | -0.96876500 | -0.08376400 |
| C   | -3.01150200 | 0.33596700  | 0.33486900  |
| C   | 3.02922600  | 0.36026200  | -0.32623900 |
| C   | 2.50037700  | -1.79409400 | 0.39430200  |
| H   | 2.53031300  | -2.83983900 | 0.67346600  |
| C   | 3.53661500  | -0.95513400 | 0.06924700  |
| C   | 1.07251000  | 2.81222900  | -0.36577800 |
| H   | 2.06471300  | 3.11894900  | -0.67447600 |
| C   | 0.05013900  | 3.63778600  | -0.08199300 |
| H   | 0.06634200  | 4.72130800  | -0.11208700 |
| C   | -1.15458900 | 2.82714700  | 0.29820200  |
| H   | -2.01296900 | 3.02840300  | -0.35951400 |
| H   | -1.49644800 | 3.05213000  | 1.32023200  |
| C   | -4.12676100 | 1.19985000  | 0.50415600  |

|   |             |             |             |
|---|-------------|-------------|-------------|
| H | -4.09895200 | 2.24059200  | 0.80503300  |
| C | 4.14877900  | 1.22383500  | -0.45740200 |
| H | 4.13340400  | 2.27371800  | -0.72460200 |
| C | 5.32385200  | 0.50524900  | -0.23504400 |
| C | 4.98818200  | -0.90655100 | 0.09073900  |
| C | -4.97028700 | -0.91605900 | -0.09360000 |
| C | -5.30393100 | 0.48910000  | 0.27517900  |
| C | 5.82634400  | -1.95108000 | 0.36310800  |
| H | 5.34802100  | -2.90712100 | 0.56958600  |
| C | 6.63757500  | 1.05302900  | -0.31908400 |
| H | 6.67223400  | 2.11341600  | -0.56721300 |
| C | -5.81107100 | -1.95091200 | -0.38940500 |
| H | -5.33524600 | -2.90100200 | -0.62734300 |
| C | -6.61692200 | 1.03181100  | 0.39051900  |
| H | -6.64929400 | 2.08374200  | 0.67326900  |
| C | 7.25747500  | -1.96010800 | 0.41550900  |
| H | 7.70158900  | -2.92365800 | 0.65667300  |
| C | 8.12991700  | -0.92617000 | 0.20389500  |
| H | 9.18733900  | -1.16581700 | 0.29817000  |
| C | 7.84814400  | 0.43901500  | -0.12828600 |
| H | 8.72480700  | 1.07287700  | -0.24375500 |
| C | -7.24383100 | -1.95818000 | -0.43163900 |
| H | -7.69025600 | -2.91343800 | -0.69991000 |
| C | -8.11292000 | -0.93097600 | -0.18043900 |
| H | -9.17128000 | -1.16752200 | -0.27380500 |
| C | -7.82953000 | 0.42405100  | 0.19292000  |
| H | -8.70559100 | 1.05262600  | 0.33764300  |

**Allene 17 B3LYP/6-31G\***

|     |             |             |             |
|-----|-------------|-------------|-------------|
| 0 1 |             |             |             |
| C   | 1.60225200  | -0.78999300 | 0.33125100  |
| C   | 1.26485800  | 0.60611200  | -0.07178600 |
| C   | -0.00953700 | 1.00203900  | -0.00738600 |
| C   | 0.68354000  | -1.86154400 | 0.18737200  |
| C   | -1.27775800 | 0.58232500  | 0.06595000  |
| C   | -0.67423100 | -1.87690100 | -0.21212900 |
| C   | -1.61357900 | -0.80532400 | -0.33695400 |
| C   | 2.49083200  | 1.33187900  | -0.37478800 |
| H   | 2.51935100  | 2.37494600  | -0.65837600 |
| C   | 3.52598700  | 0.49566700  | -0.02465100 |
| C   | 3.00829500  | -0.81124100 | 0.38649700  |
| C   | -3.02078000 | -0.83112000 | -0.38122100 |
| C   | -2.50347500 | 1.31331400  | 0.37131000  |
| H   | -2.52788800 | 2.35667200  | 0.65478200  |
| C   | -3.53908000 | 0.48052300  | 0.02510400  |
| C   | -1.06671900 | -3.28451100 | -0.37950400 |
| H   | -2.05579200 | -3.59034000 | -0.69906100 |
| C   | -0.04905300 | -4.11133600 | -0.08223700 |
| H   | -0.06616100 | -5.19494100 | -0.11261700 |
| C   | 1.15101300  | -3.30161000 | 0.31483100  |



|   |              |             |             |
|---|--------------|-------------|-------------|
| H | 2.01956600   | -3.50306100 | -0.32958900 |
| H | 1.47783300   | -3.52674600 | 1.34185600  |
| C | 4.11340400   | -1.67279000 | 0.58289900  |
| H | 4.07931800   | -2.71219000 | 0.88793700  |
| C | -4.13106300  | -1.68857200 | -0.56298900 |
| H | -4.10940200  | -2.73149800 | -0.85613100 |
| C | -5.31634400  | -0.97379300 | -0.35659600 |
| C | -4.99402800  | 0.42609400  | 0.01300700  |
| C | 4.98090100   | 0.43646500  | -0.00802400 |
| C | 5.30074100   | -0.96277200 | 0.37594800  |
| C | -5.85127200  | 1.45312000  | 0.29818800  |
| C | -6.61710400  | -1.53381100 | -0.49542400 |
| H | -6.62862700  | -2.58930700 | -0.77029600 |
| C | 5.84037800   | 1.45884300  | -0.30106700 |
| C | 6.60054000   | -1.52148300 | 0.52643100  |
| H | 6.61001200   | -2.57373900 | 0.81402800  |
| C | -7.30480200  | 1.46806900  | 0.30104200  |
| C | -8.17064500  | 0.42450000  | 0.02682700  |
| C | -7.83938200  | -0.94178000 | -0.33197400 |
| C | 7.29477100   | 1.47091000  | -0.30282900 |
| C | 8.15738900   | 0.42893900  | -0.01464300 |
| C | 7.82416800   | -0.93317700 | 0.36027900  |
| C | -9.63103400  | 0.51591800  | 0.05498700  |
| H | -10.17368700 | 1.42351500  | 0.29355900  |
| C | -10.19607600 | -0.66735000 | -0.25052200 |
| H | -11.26097600 | -0.86781200 | -0.29836400 |
| C | 7.70908800   | 2.82400300  | -0.67273200 |
| H | 8.74411500   | 3.13618500  | -0.75273500 |
| C | 6.64155700   | 3.61336300  | -0.89515700 |
| H | 6.67338100   | 4.65841900  | -1.18354400 |
| C | 9.61795500   | 0.51820100  | -0.04081700 |
| H | 10.16221500  | 1.42214700  | -0.28948400 |
| C | 10.18104900  | -0.66170700 | 0.28097100  |
| H | 11.24575200  | -0.86223900 | 0.33397500  |
| C | -9.14406900  | -1.70514800 | -0.52316200 |
| H | -9.22914100  | -2.12395500 | -1.53763100 |
| H | -9.22222800  | -2.56215200 | 0.16339200  |
| C | 9.12770100   | -1.69520900 | 0.56477100  |
| H | 9.20780200   | -2.56147100 | -0.10993500 |
| H | 9.21104900   | -2.10040700 | 1.58504000  |
| C | 5.36330500   | 2.84711100  | -0.69668100 |
| H | 4.71850600   | 3.29108900  | 0.07781500  |
| H | 4.75107100   | 2.81688700  | -1.61133600 |
| C | -5.37105500  | 2.84419400  | 0.67916800  |
| H | -4.76080500  | 2.82300000  | 1.59532100  |
| H | -4.72432500  | 3.27842700  | -0.09913100 |
| C | -7.71672600  | 2.82618600  | 0.65535900  |
| H | -8.75110900  | 3.14116700  | 0.73192900  |
| C | -6.64741300  | 3.61563000  | 0.86838800  |
| H | -6.67681100  | 4.66398800  | 1.14476100  |

Allene 18 B3LYP/6-31G\*

|   |   |             |             |             |
|---|---|-------------|-------------|-------------|
| 0 | 1 |             |             |             |
| C |   | -1.59602800 | -0.94569900 | -0.38925900 |
| C |   | -1.26398800 | 0.43879500  | 0.05785400  |
| C |   | 0.00853500  | 0.85303700  | 0.02009400  |
| C |   | -0.68009000 | -2.01652000 | -0.26434800 |
| C |   | 1.27308900  | 0.40767100  | -0.04956600 |
| C |   | 0.67233600  | -2.05449800 | 0.15814700  |
| C |   | 1.60516900  | -0.98424100 | 0.31780800  |
| C |   | -2.49866000 | 1.14919000  | 0.36807600  |
| H |   | -2.53230500 | 2.18418700  | 0.68021300  |
| C |   | -3.52820800 | 0.32338800  | -0.02471800 |
| C |   | -3.00341500 | -0.96688300 | -0.47623700 |
| C |   | 3.01609600  | -1.01634000 | 0.37878400  |
| C |   | 2.50658800  | 1.14421900  | -0.32179000 |
| H |   | 2.53149300  | 2.19503700  | -0.57854000 |
| C |   | 3.54058600  | 0.30523800  | 0.01153900  |
| C |   | 1.05821900  | -3.45530700 | 0.32633200  |
| H |   | 2.03579400  | -3.76133900 | 0.67129900  |
| C |   | 0.03329800  | -4.28439100 | -0.00947400 |
| C |   | -1.16012500 | -3.44954700 | -0.41341200 |
| H |   | -2.03786500 | -3.63643900 | 0.22134300  |
| H |   | -1.47104500 | -3.66972300 | -1.44533600 |
| C |   | -4.10507000 | -1.81697700 | -0.72934900 |
| H |   | -4.06652700 | -2.84293200 | -1.07851300 |
| C |   | 4.12025600  | -1.87689600 | 0.54976700  |
| H |   | 4.09490100  | -2.92755100 | 0.81467000  |
| C |   | 5.31422000  | -1.15747800 | 0.37115800  |
| C |   | 4.99707900  | 0.24634500  | 0.03610900  |
| C |   | -4.98455100 | 0.26253000  | -0.06836300 |
| C |   | -5.29906900 | -1.11494000 | -0.51534000 |
| C |   | 5.86122500  | 1.27744200  | -0.21555500 |
| C |   | 6.61252700  | -1.71593500 | 0.50535100  |
| H |   | 6.62822900  | -2.77792900 | 0.75509800  |
| C |   | -5.85009400 | 1.27051400  | 0.25564200  |
| C |   | -6.59864300 | -1.65655300 | -0.71291200 |
| H |   | -6.61185400 | -2.69576100 | -1.04622700 |
| C |   | 7.31048800  | 1.30900600  | -0.21521400 |
| C |   | 8.18081600  | 0.25390300  | 0.04121700  |
| C |   | 7.83408800  | -1.11251200 | 0.36219100  |
| C |   | -7.30162900 | 1.30406700  | 0.23957300  |
| C |   | -8.16715300 | 0.27604300  | -0.11106500 |
| C |   | -7.81980600 | -1.06367700 | -0.54339800 |
| C |   | 9.63033400  | 0.35164600  | 0.03405700  |
| H |   | 10.16681000 | 1.26986600  | -0.16388000 |
| C |   | 10.20647200 | -0.85571400 | 0.30754700  |
| C |   | -7.71238200 | 2.63441500  | 0.65273600  |
| H |   | -8.74570000 | 2.94876800  | 0.71503300  |
| C |   | -6.63093500 | 3.41592700  | 0.94245400  |
| C |   | -9.61663900 | 0.36890400  | -0.09409000 |

|   |              |             |             |
|---|--------------|-------------|-------------|
| H | -10.15478500 | 1.25801300  | 0.20616300  |
| C | -10.19125500 | -0.80144100 | -0.49898500 |
| C | 9.12981600   | -1.88850600 | 0.55464700  |
| H | 9.19034800   | -2.31714900 | 1.56560400  |
| H | 9.21122200   | -2.73276600 | -0.14590800 |
| C | -9.11576000  | -1.82000000 | -0.80391300 |
| H | -9.19643400  | -2.71038600 | -0.16282900 |
| H | -9.18256400  | -2.17899700 | -1.84193000 |
| C | -5.35876700  | 2.63237700  | 0.71228400  |
| H | -4.70539300  | 3.09027900  | -0.04546800 |
| H | -4.75406100  | 2.55655000  | 1.62861000  |
| C | 5.36709500   | 2.66830400  | -0.57042800 |
| H | 4.76689200   | 2.64776600  | -1.49196000 |
| H | 4.71113800   | 3.07820400  | 0.21212900  |
| C | 7.72127500   | 2.66155100  | -0.54218100 |
| H | 8.75482500   | 2.97014800  | -0.62344800 |
| C | 6.63732900   | 3.47149200  | -0.73279400 |
| N | 0.03088800   | -5.66754000 | -0.07898000 |
| C | 1.20828500   | -6.35122800 | 0.42361100  |
| H | 2.10212500   | -5.94407700 | -0.05975600 |
| H | 1.33118700   | -6.24725800 | 1.51570600  |
| H | 1.14068400   | -7.41586300 | 0.18030800  |
| C | -1.22750900  | -6.37574500 | 0.09832100  |
| H | -1.57068300  | -6.39629200 | 1.14774300  |
| H | -2.00986900  | -5.91199200 | -0.50702700 |
| H | -1.10858700  | -7.40964300 | -0.24190100 |
| N | -11.53022500 | -1.06785800 | -0.69172800 |
| N | -6.61959300  | 4.69992700  | 1.44413300  |
| N | 6.62293500   | 4.82537500  | -0.97700100 |
| N | 11.54628000  | -1.17694900 | 0.30736200  |
| C | 7.89733700   | 5.48583600  | -1.19774700 |
| H | 7.74652400   | 6.56895800  | -1.20472700 |
| H | 8.58562100   | 5.24029100  | -0.38286900 |
| H | 8.36933100   | 5.19092000  | -2.14969400 |
| C | 5.46875100   | 5.43702600  | -1.61953300 |
| H | 4.54452500   | 5.01878300  | -1.21625400 |
| H | 5.46971300   | 6.51197600  | -1.41280000 |
| H | 5.46360500   | 5.29747500  | -2.71368100 |
| C | -12.48278900 | -0.04781400 | -0.29025000 |
| H | -12.20618700 | 0.91142600  | -0.73889600 |
| H | -13.47830500 | -0.32095400 | -0.65161600 |
| H | -12.53038000 | 0.08391200  | 0.80381100  |
| C | -12.00960400 | -2.44042900 | -0.62609100 |
| H | -12.98674700 | -2.50328200 | -1.11559900 |
| H | -11.32599500 | -3.10655800 | -1.15643300 |
| H | -12.11971900 | -2.80935300 | 0.40809700  |
| C | -5.45905600  | 5.55065900  | 1.22597400  |
| H | -5.47150300  | 6.36919900  | 1.95286700  |
| H | -4.53894500  | 4.98253800  | 1.37671700  |
| H | -5.43216400  | 5.99030800  | 0.21424000  |
| C | -7.89287100  | 5.38720700  | 1.56235500  |
| H | -8.60148200  | 4.75751300  | 2.10971900  |

|   |             |             |             |
|---|-------------|-------------|-------------|
| H | -7.75206100 | 6.31438700  | 2.12523700  |
| H | -8.33661500 | 5.63507100  | 0.58329100  |
| C | 12.49750700 | -0.09272200 | 0.13600500  |
| H | 12.23550000 | 0.48984900  | -0.75277500 |
| H | 12.52468500 | 0.59063200  | 1.00119000  |
| H | 13.49783200 | -0.50983500 | -0.00999500 |
| C | 12.01639500 | -2.31504500 | 1.08358100  |
| H | 12.10541400 | -2.09354200 | 2.16077600  |
| H | 11.33892400 | -3.16282600 | 0.96257600  |
| H | 13.00175100 | -2.61844300 | 0.71589200  |

**Allene 19 B3LYP/6-31G\***

|     |             |             |             |
|-----|-------------|-------------|-------------|
| 0 1 |             |             |             |
| C   | -1.59802500 | 0.88622300  | 0.63319500  |
| C   | -1.23202400 | -0.49751100 | 0.24903800  |
| C   | 0.03391700  | -0.96228800 | 0.29601500  |
| C   | -0.74949100 | 1.95807200  | 0.48718200  |
| C   | 1.26968900  | -0.41739900 | 0.34658200  |
| C   | 0.65055900  | 2.00198100  | 0.06713200  |
| C   | 1.56656700  | 0.96993100  | -0.06896500 |
| C   | -2.46211100 | -1.21309000 | -0.07113400 |
| H   | -2.46635000 | -2.23416900 | -0.43360000 |
| C   | -3.53529400 | -0.42698300 | 0.26188800  |
| C   | -3.04477900 | 0.88391800  | 0.72887100  |
| C   | 3.01133400  | 1.03334000  | -0.17602900 |
| C   | 2.53236200  | -1.07091100 | 0.67628300  |
| H   | 2.58415100  | -2.08536500 | 1.05288600  |
| C   | 3.56482600  | -0.24492300 | 0.31668300  |
| C   | 0.99132300  | 3.41820100  | -0.09948800 |
| H   | 1.96895500  | 3.75659200  | -0.42036200 |
| C   | -0.04933000 | 4.21228200  | 0.20701300  |
| H   | -0.05451100 | 5.29636100  | 0.17132100  |
| C   | -1.23573500 | 3.39144400  | 0.62707400  |
| H   | -2.12524600 | 3.57941000  | 0.00617100  |
| H   | -1.53992500 | 3.61310000  | 1.66171700  |
| C   | -4.13227000 | 1.67085200  | 0.98582400  |
| H   | -4.14976200 | 2.69061500  | 1.35322000  |
| C   | 4.06560500  | 1.85387900  | -0.46856100 |
| H   | 4.04352300  | 2.86527400  | -0.85827600 |
| C   | 5.30765700  | 1.12904300  | -0.21092100 |
| C   | 5.00782600  | -0.16829700 | 0.27136800  |
| C   | -4.98129500 | -0.40147900 | 0.27089300  |
| C   | -5.34083800 | 0.89291700  | 0.71692400  |
| C   | 5.93956000  | -1.15039700 | 0.72729300  |
| C   | 6.58520200  | 1.71650700  | -0.43801100 |
| H   | 6.56770000  | 2.75563900  | -0.76497600 |
| C   | -5.86564600 | -1.48750200 | -0.01543200 |
| C   | -6.64504500 | 1.43367800  | 0.91136900  |
| H   | -6.67249500 | 2.44649600  | 1.31201000  |
| C   | 7.32465800  | -1.17840800 | 0.63083900  |

|   |              |             |             |
|---|--------------|-------------|-------------|
| C | 8.20511700   | -0.23001600 | -0.04854600 |
| C | 7.81998300   | 1.12400900  | -0.37325700 |
| C | -7.25012100  | -1.50816400 | -0.11313800 |
| C | -8.18226700  | -0.38428000 | -0.03559100 |
| C | -7.85515100  | 0.88186400  | 0.58036100  |
| C | 9.54623300   | -0.43698300 | -0.41745200 |
| C | 10.15796000  | 0.81699000  | -0.82066500 |
| C | -7.66951100  | -2.91196400 | -0.25177700 |
| H | -8.70305700  | -3.23391900 | -0.27332400 |
| C | -6.59868000  | -3.72827300 | -0.29949300 |
| H | -6.60989700  | -4.80772900 | -0.39409400 |
| C | -9.52156300  | -0.36731400 | -0.46077100 |
| C | -10.18930400 | 0.82920300  | 0.02196100  |
| C | 9.07428300   | 1.87250200  | -0.77262900 |
| H | 8.95861500   | 2.38327500  | -1.73696200 |
| H | 9.31770000   | 2.65157300  | -0.03591800 |
| C | -9.14575500  | 1.65783500  | 0.74044700  |
| H | -9.07139900  | 2.67089400  | 0.32535800  |
| H | -9.40278600  | 1.77573900  | 1.80301400  |
| C | -5.35238700  | -2.90474400 | -0.17955200 |
| H | -4.73109100  | -3.21099400 | 0.67430900  |
| H | -4.71138200  | -2.99677200 | -1.06980900 |
| C | 5.48924600   | -2.36670100 | 1.51255400  |
| H | 4.88038300   | -2.08351900 | 2.38313900  |
| H | 4.85424700   | -3.02369400 | 0.89841900  |
| C | 7.80497700   | -2.33467600 | 1.40434700  |
| H | 8.85156200   | -2.55994700 | 1.56676700  |
| C | 6.77080500   | -3.03378100 | 1.91131000  |
| H | 6.82931900   | -3.92546100 | 2.52432000  |
| C | 10.20277900  | -1.72551200 | -0.52905500 |
| H | 9.54581900   | -2.58440800 | -0.42939900 |
| C | -10.13205700 | -1.31753100 | -1.37143900 |
| H | -9.44186500  | -2.01447300 | -1.83764200 |
| C | -11.42726300 | -1.42485300 | -1.77088800 |
| H | -11.63453100 | -2.21649500 | -2.48901200 |
| C | -12.58155500 | -0.63437500 | -1.39559700 |
| H | -13.53437200 | -0.99240400 | -1.77994000 |
| C | 11.50401600  | -2.01403700 | -0.79845600 |
| H | 11.74982900  | -3.07320900 | -0.85360800 |
| C | 12.62042100  | -1.12295500 | -1.03748100 |
| H | 13.59025100  | -1.60765100 | -1.12823900 |
| C | 11.44633000  | 1.10984600  | -1.15396600 |
| H | 11.65884200  | 2.15132500  | -1.39075500 |
| C | 12.58641700  | 0.22550500  | -1.20191400 |
| H | 13.53639300  | 0.71553100  | -1.40926600 |
| C | -11.49441700 | 1.21142300  | -0.05839900 |
| H | -11.75102500 | 2.15552100  | 0.41993600  |
| C | -12.60172200 | 0.51108800  | -0.66516100 |
| H | -13.57370500 | 0.97973600  | -0.51946500 |

## PROTONATED B3LYP

### Allene 1H B3LYP/6-31G\*

|   |   |           |          |           |
|---|---|-----------|----------|-----------|
| 1 | 1 |           |          |           |
| C |   | 0.697708  | 0.000000 | 1.453263  |
| C |   | -0.701008 | 0.000000 | 1.451673  |
| C |   | -1.571936 | 0.000000 | 0.356899  |
| C |   | 1.571120  | 0.000000 | 0.360470  |
| C |   | -1.259264 | 0.000000 | -1.006646 |
| C |   | 1.261548  | 0.000000 | -1.003781 |
| C |   | 0.001831  | 0.000000 | -1.611925 |
| H |   | 1.168796  | 0.000000 | 2.433381  |
| H |   | -1.174322 | 0.000000 | 2.430718  |
| H |   | -2.632332 | 0.000000 | 0.598007  |
| H |   | 2.630966  | 0.000000 | 0.603987  |
| H |   | -2.108705 | 0.000000 | -1.685585 |
| H |   | 2.112529  | 0.000000 | -1.680788 |
| H |   | 0.003067  | 0.000000 | -2.699429 |

### Allene 2H B3LYP/6-31G\*

|   |   |             |             |             |
|---|---|-------------|-------------|-------------|
| 1 | 1 |             |             |             |
| C |   | 0.50468300  | -0.69603500 | 0.00012600  |
| C |   | 0.49711500  | 0.73423000  | 0.00011100  |
| C |   | -0.61809000 | 1.59249200  | 0.00019900  |
| C |   | -0.56619400 | -1.57415900 | 0.00011500  |
| C |   | -1.96431300 | 1.25071500  | 0.00000900  |
| C |   | -1.93991100 | -1.27214000 | -0.00008600 |
| C |   | -2.55641600 | -0.02566200 | -0.00019200 |
| H |   | -0.39535400 | 2.65718300  | 0.00036400  |
| H |   | -0.31776700 | -2.63377400 | 0.00019100  |
| H |   | -2.65977800 | 2.08654000  | 0.00003900  |
| H |   | -2.60674700 | -2.13075700 | -0.00022900 |
| H |   | -3.64347000 | -0.03609300 | -0.00040200 |
| C |   | 1.87198000  | 1.19715100  | -0.00011900 |
| H |   | 2.15456000  | 2.24349100  | -0.00007000 |
| C |   | 2.71269600  | 0.13617700  | -0.00023300 |
| H |   | 3.79573200  | 0.18313600  | -0.00059500 |
| C |   | 1.94562200  | -1.14715500 | 0.00013500  |
| H |   | 2.17496600  | -1.77159800 | 0.87709400  |
| H |   | 2.17482200  | -1.77181900 | -0.87679200 |

### Allene 3H B3LYP/6-31G\*

|   |   |            |             |             |
|---|---|------------|-------------|-------------|
| 1 | 1 |            |             |             |
| C |   | 0.66956400 | -0.14292100 | -0.00008900 |
| C |   | 1.41022100 | 1.08243800  | -0.00007800 |
| C |   | 2.80541600 | 1.26018900  | 0.00005300  |
| C |   | 1.16487400 | -1.43691500 | 0.00006600  |
| C |   | 2.50290200 | -1.86949600 | 0.00019900  |

|   |             |             |             |
|---|-------------|-------------|-------------|
| C | 3.66736300  | -1.10945900 | 0.00015300  |
| H | 3.14743100  | 2.29291000  | 0.00010600  |
| H | 0.42378300  | -2.23299100 | 0.00009300  |
| H | 2.64291900  | -2.94772300 | 0.00033900  |
| H | 4.59921700  | -1.66924500 | 0.00022300  |
| C | 0.46409800  | 2.17785600  | -0.00046600 |
| H | 0.75154100  | 3.22309600  | -0.00042200 |
| C | -0.79561300 | 1.68661200  | -0.00074200 |
| H | -1.69557500 | 2.29008000  | -0.00112800 |
| C | -0.81737800 | 0.18191400  | -0.00022500 |
| C | -1.53137600 | -0.38495900 | 1.27733900  |
| H | -1.06548000 | 0.03867900  | 2.17413000  |
| H | -1.36084600 | -1.46866200 | 1.30838900  |
| C | -1.53159300 | -0.38615600 | -1.27711600 |
| H | -1.06582800 | 0.03664800  | -2.17435500 |
| H | -1.36110800 | -1.46988400 | -1.30712500 |
| C | -3.04431400 | -0.11847500 | 1.26826600  |
| H | -3.48163700 | -0.58043300 | 2.16072000  |
| H | -3.23675900 | 0.95908400  | 1.35811900  |
| C | -3.04453200 | -0.11962400 | -1.26807100 |
| H | -3.48199200 | -0.58239500 | -2.16004000 |
| H | -3.23699800 | 0.95785000  | -1.35889900 |
| C | -3.71387500 | -0.66592000 | 0.00040300  |
| H | -3.65019200 | -1.76344200 | 0.00090200  |
| H | -4.78037400 | -0.41660900 | 0.00038400  |
| C | 3.79946300  | 0.28984400  | 0.00005600  |
| H | 4.82058100  | 0.66346800  | 0.00006400  |

**Allene 4H B3LYP/6-31G\***

|     |             |             |             |
|-----|-------------|-------------|-------------|
| 1 1 |             |             |             |
| C   | -0.50472300 | -0.69616100 | -0.00000200 |
| C   | -0.49711500 | 0.73419800  | -0.00000300 |
| C   | 0.61809900  | 1.59248100  | 0.00000000  |
| C   | 0.56629600  | -1.57417000 | -0.00000200 |
| C   | 1.96427600  | 1.25078800  | 0.00000100  |
| C   | 1.93995600  | -1.27215600 | -0.00000100 |
| C   | 2.55641000  | -0.02563000 | 0.00000000  |
| H   | 2.65983900  | 2.08651500  | 0.00000000  |
| H   | 3.64345400  | -0.03590400 | -0.00000100 |
| C   | -1.87198600 | 1.19717700  | 0.00000600  |
| H   | -2.15466000 | 2.24348500  | 0.00001500  |
| C   | -2.71270200 | 0.13619000  | -0.00001200 |
| H   | -3.79573900 | 0.18303900  | -0.00001400 |
| C   | -1.94564500 | -1.14711300 | 0.00000800  |
| H   | -2.17498200 | -1.77173000 | -0.87689600 |
| H   | -2.17497900 | -1.77171000 | 0.87692900  |
| H   | 0.39519000  | 2.65713800  | 0.00000200  |
| H   | 0.31780400  | -2.63377200 | 0.00000000  |
| H   | 2.60687300  | -2.13068000 | -0.00000200 |

**Allene 5H B3LYP/6-31G\***

|   |   |             |             |             |
|---|---|-------------|-------------|-------------|
| 1 | 1 |             |             |             |
| C |   | -0.66956700 | -0.14293400 | -0.00028600 |
| C |   | -1.41022200 | 1.08243600  | -0.00006200 |
| C |   | -2.80540000 | 1.26019100  | 0.00017700  |
| C |   | -1.16489800 | -1.43690900 | -0.00007600 |
| C |   | -3.79947000 | 0.28987200  | 0.00020600  |
| C |   | -2.50293400 | -1.86948000 | 0.00027900  |
| C |   | -3.66739300 | -1.10943600 | 0.00027000  |
| H |   | -0.42380600 | -2.23298600 | 0.00020200  |
| H |   | -4.82058200 | 0.66350500  | 0.00020800  |
| H |   | -2.64295600 | -2.94770700 | -0.00016600 |
| H |   | -4.59926600 | -1.66919000 | 0.00017100  |
| C |   | -0.46409000 | 2.17783200  | -0.00072800 |
| H |   | -0.75151500 | 3.22307400  | -0.00084900 |
| C |   | 0.79561100  | 1.68656600  | -0.00104500 |
| H |   | 1.69558900  | 2.29001500  | -0.00156100 |
| C |   | 0.81738700  | 0.18188000  | -0.00042000 |
| C |   | 1.53174400  | -0.38632600 | -1.27711300 |
| H |   | 1.06608300  | 0.03635300  | -2.17447100 |
| H |   | 1.36125100  | -1.47006100 | -1.30704100 |
| C |   | 1.53124700  | -0.38480100 | 1.27734300  |
| H |   | 1.06520900  | 0.03896700  | 2.17399700  |
| H |   | 1.36071900  | -1.46850200 | 1.30851900  |
| C |   | 3.04467700  | -0.11983700 | -1.26794200 |
| H |   | 3.23716700  | 0.95761900  | -1.35898300 |
| H |   | 3.48223000  | -0.58277100 | -2.15978500 |
| C |   | 3.71390800  | -0.66585400 | 0.00069700  |
| C |   | 3.04416600  | -0.11829100 | 1.26840700  |
| H |   | 3.23658500  | 0.95928300  | 1.35817900  |
| H |   | 3.48137300  | -0.58012500 | 2.16098700  |
| H |   | 4.78038900  | -0.41645100 | 0.00075800  |
| H |   | 3.65036000  | -1.76338800 | 0.00135000  |
| H |   | -3.14741800 | 2.29291300  | 0.00023900  |

**Allene 6H B3LYP/6-31G\***

|   |   |             |             |             |
|---|---|-------------|-------------|-------------|
| 1 | 1 |             |             |             |
| C |   | 0.67811200  | -0.57383900 | 0.00005000  |
| C |   | 1.56982300  | 0.55112500  | 0.00000800  |
| C |   | 1.27829000  | 1.90080100  | -0.00007800 |
| C |   | -0.71770500 | -0.54832200 | 0.00010800  |
| C |   | 0.01437300  | 2.52742700  | -0.00005700 |
| C |   | -1.58087000 | 0.58027700  | 0.00004100  |
| C |   | -1.24380400 | 1.95127900  | -0.00006100 |
| H |   | 2.13272300  | 2.57467200  | 0.00032100  |
| H |   | -2.08509900 | 2.64051900  | -0.00006400 |
| C |   | 2.98598300  | 0.01908300  | -0.00000600 |
| H |   | 3.55065300  | 0.36850200  | 0.87735600  |
| C |   | 2.79964300  | -1.46528300 | -0.00006500 |



|   |             |             |             |
|---|-------------|-------------|-------------|
| H | 3.62388400  | -2.16940700 | 0.00000800  |
| C | 1.48742400  | -1.78557700 | -0.00001000 |
| H | 1.07962500  | -2.78887700 | -0.00008400 |
| C | -1.58006600 | -1.78954000 | 0.00004500  |
| H | -1.38392100 | -2.42319800 | -0.87801700 |
| H | -1.38400400 | -2.42358600 | 0.87778700  |
| C | -2.95674700 | 0.10395500  | 0.00009300  |
| H | -3.81821100 | 0.76173900  | 0.00023600  |
| C | -2.97504100 | -1.24633200 | -0.00012600 |
| H | -3.85865300 | -1.87395200 | -0.00020200 |
| H | 0.03573500  | 3.61433000  | 0.00007100  |
| H | 3.55079300  | 0.36894800  | -0.87705600 |

### Allene 7H B3LYP/6-31G\*

1 1

|   |             |             |             |
|---|-------------|-------------|-------------|
| C | 1.19969600  | 0.77475600  | -0.00005200 |
| C | 1.47056200  | 2.17577900  | 0.00028000  |
| C | 0.58547700  | 3.27351700  | 0.00000800  |
| C | -0.06504900 | 0.16603800  | -0.00033400 |
| C | -0.79569000 | 3.26610600  | -0.00022400 |
| C | -1.35546600 | 0.81147000  | -0.00031000 |
| C | -1.66247100 | 2.15794500  | -0.00022900 |
| H | 1.06003400  | 4.25221500  | 0.00004500  |
| H | -2.72136400 | 2.40483600  | -0.00023300 |
| C | 2.90831200  | 2.36910200  | 0.00075900  |
| H | 3.38071100  | 3.34495900  | 0.00129400  |
| C | 3.52640300  | 1.17292900  | 0.00043300  |
| H | 4.59916000  | 1.02400500  | 0.00060600  |
| C | 2.54415400  | 0.03139700  | 0.00007500  |
| C | 2.74939600  | -0.83681100 | -1.29115500 |
| H | 2.70571800  | -0.18271100 | -2.16959000 |
| H | 1.91921200  | -1.54336300 | -1.38821300 |
| C | 2.74900000  | -0.83733800 | 1.29099800  |
| H | 2.70498000  | -0.18364400 | 2.16971100  |
| H | 1.91885100  | -1.54401200 | 1.38746900  |
| C | 4.06935500  | -1.62433300 | -1.26737900 |
| H | 4.11191200  | -2.25645100 | -2.16187200 |
| H | 4.92204900  | -0.93634700 | -1.34071900 |
| C | 4.06901200  | -1.62476900 | 1.26730400  |
| H | 4.11146400  | -2.25713000 | 2.16162800  |
| H | 4.92163800  | -0.93672400 | 1.34106400  |
| C | 4.20330100  | -2.47995900 | -0.00017200 |
| H | 3.42503000  | -3.25723200 | -0.00042300 |
| H | 5.16497700  | -3.00466400 | -0.00014300 |
| C | -2.45350100 | -0.24940100 | -0.00038300 |
| C | -0.31962800 | -1.27187100 | -0.00062600 |
| H | 0.44474400  | -2.03367800 | -0.00070700 |
| C | -1.64541600 | -1.51427800 | -0.00075500 |
| H | -2.08992100 | -2.50244600 | -0.00111500 |
| C | -3.35696700 | -0.14480000 | -1.27548100 |

|   |             |             |             |
|---|-------------|-------------|-------------|
| H | -2.73717200 | -0.26058500 | -2.17200100 |
| C | -3.35597800 | -0.14526700 | 1.27561500  |
| H | -2.73540400 | -0.26140900 | 2.17154300  |
| C | -4.50243800 | -1.16842200 | 1.26909200  |
| H | -4.09825600 | -2.18597400 | 1.35802400  |
| H | -5.11847000 | -1.00731700 | 2.16121200  |
| C | -4.50342200 | -1.16797000 | -1.26844400 |
| H | -5.12013900 | -1.00655600 | -2.16003200 |
| H | -4.09931300 | -2.18549200 | -1.35804200 |
| C | -5.35980000 | -1.05612600 | 0.00067500  |
| H | -5.88203200 | -0.08862900 | 0.00105200  |
| H | -6.13635500 | -1.82878600 | 0.00084600  |
| H | -3.78390300 | 0.86556100  | -1.31149800 |
| H | -3.78281300 | 0.86511200  | 1.31230600  |
| H | -1.27837500 | 4.24030900  | -0.00037900 |

### Allene 8H B3LYP/6-31G\*

|     |             |             |             |
|-----|-------------|-------------|-------------|
| 1 1 |             |             |             |
| C   | -0.71772300 | -0.54829900 | -0.00001300 |
| C   | -1.58086500 | 0.58027000  | 0.00000900  |
| C   | -1.24382200 | 1.95126700  | 0.00000100  |
| C   | 0.67811400  | -0.57379900 | -0.00000800 |
| C   | 0.01438700  | 2.52739400  | 0.00002500  |
| C   | 1.56982700  | 0.55112000  | 0.00001900  |
| C   | 1.27828600  | 1.90077000  | -0.00002200 |
| H   | 0.03572200  | 3.61430800  | -0.00029200 |
| H   | 2.13276400  | 2.57460100  | -0.00005700 |
| C   | -2.95673800 | 0.10394600  | 0.00007100  |
| H   | -3.81820000 | 0.76173800  | 0.00009700  |
| C   | -2.97501900 | -1.24632600 | -0.00006600 |
| H   | -3.85865300 | -1.87392400 | -0.00012300 |
| C   | -1.58005200 | -1.78954900 | 0.00001800  |
| H   | -1.38389700 | -2.42338600 | -0.87788100 |
| H   | -1.38394500 | -2.42331500 | 0.87798900  |
| C   | 2.98599200  | 0.01905000  | 0.00006700  |
| H   | 3.55074000  | 0.36879900  | -0.87712300 |
| H   | 3.55067400  | 0.36872400  | 0.87731300  |
| C   | 1.48740300  | -1.78554400 | 0.00001300  |
| H   | 1.07964700  | -2.78885900 | 0.00001600  |
| C   | 2.79961600  | -1.46525900 | -0.00008100 |
| H   | 3.62380400  | -2.16946400 | -0.00006200 |
| H   | -2.08509100 | 2.64054100  | -0.00008000 |

### Allene 9H B3LYP/6-31G\*

|     |             |            |             |
|-----|-------------|------------|-------------|
| 1 1 |             |            |             |
| C   | 1.19973200  | 0.77480400 | -0.00004600 |
| C   | 1.47060600  | 2.17581900 | 0.00006600  |
| C   | -0.06500300 | 0.16608500 | -0.00015400 |
| C   | -0.79564700 | 3.26612800 | 0.00006400  |

|   |             |             |             |
|---|-------------|-------------|-------------|
| C | -1.35542800 | 0.81150700  | -0.00017300 |
| C | -1.66242600 | 2.15798400  | -0.00000900 |
| H | -1.27834100 | 4.24032600  | 0.00015100  |
| H | -2.72131500 | 2.40488500  | 0.00015800  |
| C | 2.90835600  | 2.36912900  | 0.00017500  |
| H | 3.38076100  | 3.34498400  | 0.00018100  |
| C | 3.52643000  | 1.17294400  | 0.00015400  |
| H | 4.59918700  | 1.02401900  | 0.00014300  |
| C | 2.54416800  | 0.03140700  | 0.00001600  |
| C | -0.31954800 | -1.27183000 | -0.00027900 |
| H | 0.44485800  | -2.03361400 | -0.00023600 |
| C | -1.64533200 | -1.51424800 | -0.00033700 |
| H | -2.08983100 | -2.50242000 | -0.00044700 |
| C | -4.50309600 | -1.16803700 | -1.26867700 |
| H | -5.11961600 | -1.00662500 | -2.16039600 |
| H | -4.09895900 | -2.18555500 | -1.35814100 |
| C | -5.35974100 | -1.05610600 | 0.00025500  |
| H | -6.13628300 | -1.82877500 | 0.00030500  |
| H | -5.88196200 | -0.08860900 | 0.00046500  |
| C | -4.50264400 | -1.16834700 | 1.26886700  |
| H | -5.11888400 | -1.00717600 | 2.16082900  |
| H | -4.09850300 | -2.18589800 | 1.35794100  |
| C | -3.35662000 | -0.14486500 | -1.27552400 |
| H | -2.73662000 | -0.26075900 | -2.17188600 |
| H | -3.78352400 | 0.86550000  | -1.31171500 |
| C | -3.35618100 | -0.14519500 | 1.27558600  |
| H | -3.78304000 | 0.86517100  | 1.31217800  |
| H | -2.73579800 | -0.26133000 | 2.17164400  |
| C | -2.45344400 | -0.24938500 | -0.00019100 |
| C | 4.06892300  | -1.62482100 | 1.26734500  |
| H | 4.92169800  | -0.93696800 | 1.34093000  |
| H | 4.11126900  | -2.25712400 | 2.16171500  |
| C | 4.06914200  | -1.62456200 | -1.26729100 |
| H | 4.11173200  | -2.25668400 | -2.16177900 |
| H | 4.92190300  | -0.93664700 | -1.34053500 |
| C | 2.74905000  | -0.83711500 | 1.29107400  |
| H | 1.91880000  | -1.54363200 | 1.38784100  |
| H | 2.70528200  | -0.18320300 | 2.16964100  |
| C | 2.74925700  | -0.83693400 | -1.29114700 |
| H | 2.70561000  | -0.18287800 | -2.16961000 |
| H | 1.91902200  | -1.54343100 | -1.38812600 |
| C | 4.20287800  | -2.48016000 | -0.00005100 |
| H | 5.16439900  | -3.00516100 | -0.00004400 |
| H | 3.42436000  | -3.25717500 | -0.00019800 |
| C | 0.58552000  | 3.27355300  | 0.00008500  |
| H | 1.06006800  | 4.25225400  | 0.00015100  |

**Allene 10H B3LYP/6-31G\***

1 1

|   |           |           |           |
|---|-----------|-----------|-----------|
| C | -0.684672 | -0.000170 | -1.564042 |
|---|-----------|-----------|-----------|

|   |           |           |           |
|---|-----------|-----------|-----------|
| C | 0.717422  | -0.000028 | -1.255733 |
| C | 1.331198  | 0.000000  | 0.000000  |
| C | -1.765532 | -0.000096 | -0.705852 |
| C | 0.717422  | 0.000028  | 1.255733  |
| C | -1.765532 | 0.000095  | 0.705852  |
| C | -0.684672 | 0.000170  | 1.564042  |
| H | -2.749097 | -0.000134 | -1.171537 |
| H | -2.749097 | 0.000134  | 1.171537  |
| C | 1.452862  | -0.000615 | -2.510886 |
| H | 2.535200  | -0.000434 | -2.570364 |
| C | 0.591811  | 0.000126  | -3.552046 |
| H | 0.863723  | 0.000785  | -4.601416 |
| C | -0.825303 | 0.000172  | -3.070220 |
| H | -1.386010 | 0.877885  | -3.425412 |
| H | -1.386645 | -0.876781 | -3.425992 |
| C | -0.825303 | -0.000172 | 3.070220  |
| H | -1.386645 | 0.876782  | 3.425992  |
| H | -1.386010 | -0.877884 | 3.425412  |
| C | 1.452862  | 0.000615  | 2.510886  |
| H | 2.535200  | 0.000433  | 2.570364  |
| C | 0.591811  | -0.000126 | 3.552046  |
| H | 0.863723  | -0.000785 | 4.601416  |
| H | 2.419407  | 0.000000  | 0.000000  |

**Allene 11H B3LYP/6-31G\***

|   |           |           |           |
|---|-----------|-----------|-----------|
| 1 | 1         |           |           |
| C | 0.008180  | 0.000139  | -1.568730 |
| C | -1.388938 | -0.000175 | -1.224916 |
| C | -1.977347 | -0.000314 | 0.036621  |
| C | 1.097815  | 0.000084  | -0.729496 |
| C | -1.343604 | -0.000140 | 1.287340  |
| C | 1.127874  | -0.000001 | 0.710675  |
| C | 0.049904  | -0.000019 | 1.589376  |
| C | -2.155462 | -0.000046 | -2.464871 |
| H | -3.239042 | 0.000074  | -2.495170 |
| C | -1.324310 | 0.000121  | -3.526198 |
| H | -1.621601 | 0.000361  | -4.568576 |
| C | 0.108271  | 0.000027  | -3.081615 |
| H | 0.654857  | -0.877565 | -3.456728 |
| H | 0.654757  | 0.877742  | -3.456605 |
| C | 0.197145  | 0.000072  | 3.095977  |
| H | 0.755084  | -0.878186 | 3.453709  |
| H | 0.755541  | 0.877977  | 3.453784  |
| C | -2.079477 | 0.000110  | 2.546134  |
| H | -3.161891 | 0.000002  | 2.604690  |
| C | -1.218803 | 0.000229  | 3.584813  |
| H | -1.485625 | 0.000301  | 4.635339  |
| C | 2.528040  | -0.000055 | 1.125967  |
| H | 2.852848  | 0.000049  | 2.159170  |
| C | 3.334525  | -0.000291 | 0.046191  |

|   |           |           |           |
|---|-----------|-----------|-----------|
| H | 4.418388  | -0.000398 | 0.062438  |
| C | 2.532556  | 0.000133  | -1.220123 |
| H | 2.751857  | -0.877183 | -1.845929 |
| H | 2.751839  | 0.878039  | -1.845159 |
| H | -3.065224 | -0.000449 | 0.056172  |

**Allene 12H B3LYP/6-31G\***

|     |             |             |             |
|-----|-------------|-------------|-------------|
| 1 1 |             |             |             |
| C   | -1.60189400 | 0.07954700  | -0.00007700 |
| C   | -1.28473300 | -1.30017100 | 0.00003400  |
| C   | -0.04040700 | -1.93437800 | 0.00008300  |
| C   | -0.69769300 | 1.17391000  | -0.00005700 |
| C   | 1.21928700  | -1.35468100 | -0.00000200 |
| C   | 0.71748500  | 1.13421800  | 0.00002400  |
| C   | 1.57552600  | 0.02615600  | 0.00006100  |
| C   | -2.58099900 | -2.07790000 | 0.00021200  |
| H   | -2.65620700 | -2.73746000 | 0.87801000  |
| C   | -3.62912200 | -1.01225200 | -0.00016400 |
| H   | -4.69323400 | -1.21721500 | -0.00040700 |
| C   | -3.05552500 | 0.21029800  | -0.00012900 |
| C   | 3.03357700  | 0.11180100  | 0.00014300  |
| C   | 2.49514100  | -2.16764600 | -0.00011100 |
| H   | 2.55573200  | -2.82867000 | 0.87746800  |
| C   | 3.57029300  | -1.12652400 | -0.00019400 |
| H   | 4.62859800  | -1.36058000 | -0.00044900 |
| H   | 2.55566800  | -2.82895200 | -0.87745400 |
| H   | -2.65625900 | -2.73864800 | -0.87663300 |
| H   | -3.58494800 | 1.15443700  | -0.00022200 |
| H   | 3.58769100  | 1.04246900  | 0.00002000  |
| C   | -1.11360600 | 2.57374000  | -0.00004000 |
| H   | -2.14411900 | 2.90463900  | -0.00015500 |
| C   | -0.02947900 | 3.37668000  | 0.00002500  |
| H   | -0.03713400 | 4.46036100  | -0.00010100 |
| C   | 1.22294500  | 2.55971800  | 0.00011300  |
| H   | 1.85209000  | 2.76896600  | 0.87818700  |
| H   | 1.85237500  | 2.76901600  | -0.87773300 |
| H   | -0.06503700 | -3.02345300 | -0.00005300 |

**Allene 13H B3LYP/6-31G\***

|     |             |             |             |
|-----|-------------|-------------|-------------|
| 1 1 |             |             |             |
| C   | -0.70168100 | 2.54773100  | -0.12905000 |
| C   | -1.56388300 | 1.49726700  | -0.20046500 |
| C   | -1.29239800 | 0.08509500  | -0.03391100 |
| C   | 0.70171400  | 2.54772100  | 0.12906900  |
| C   | -0.00000200 | -0.48559200 | -0.00001700 |
| C   | 1.56390400  | 1.49724500  | 0.20046000  |
| C   | 1.29239800  | 0.08508300  | 0.03388100  |
| H   | -1.14490300 | 3.53107000  | -0.26434200 |
| H   | -2.59336700 | 1.76340500  | -0.39969000 |

|   |             |             |             |
|---|-------------|-------------|-------------|
| H | 1.14495300  | 3.53105300  | 0.26435500  |
| H | 2.59339700  | 1.76336400  | 0.39966500  |
| N | -2.37106300 | -0.74448700 | 0.03489600  |
| N | 2.37105300  | -0.74450300 | -0.03490400 |
| C | -3.74873300 | -0.22940600 | 0.01811800  |
| H | -4.01373200 | 0.19257100  | -0.95826400 |
| H | -4.43002700 | -1.05315600 | 0.22368600  |
| H | -3.89836800 | 0.52813100  | 0.79322800  |
| C | -2.20157100 | -2.19684100 | 0.13334800  |
| H | -1.68326800 | -2.59840900 | -0.74586100 |
| H | -1.64230400 | -2.47092600 | 1.03573400  |
| H | -3.18191100 | -2.66650500 | 0.18733200  |
| C | 3.74872200  | -0.22942000 | -0.01810400 |
| H | 3.89837300  | 0.52810300  | -0.79322600 |
| H | 4.01369400  | 0.19258000  | 0.95827600  |
| H | 4.43002600  | -1.05317000 | -0.22363800 |
| C | 2.20154700  | -2.19685800 | -0.13333600 |
| H | 1.68323600  | -2.59841000 | 0.74587600  |
| H | 1.64228000  | -2.47094800 | -1.03572000 |
| H | 3.18188200  | -2.66653500 | -0.18730900 |
| H | -0.00000500 | -1.56142500 | -0.00001600 |

**Allene 14H B3LYP/6-31G\***

|     |             |             |             |
|-----|-------------|-------------|-------------|
| 1 1 |             |             |             |
| C   | 0.66586200  | 1.69433700  | 0.12741800  |
| C   | 1.58754300  | 0.63428400  | 0.08326600  |
| C   | 1.30860800  | -0.75782700 | -0.05268200 |
| C   | -0.74779300 | 1.66584600  | 0.01235900  |
| C   | 0.01234900  | -1.33972700 | -0.05424800 |
| C   | -1.61651000 | 0.58340000  | -0.09689300 |
| C   | -1.28717400 | -0.82361400 | -0.00647800 |
| C   | 2.97691900  | 1.24307700  | 0.01349300  |
| H   | 3.48954200  | 0.93346500  | -0.90968000 |
| C   | 2.72815600  | 2.71624600  | 0.06204100  |
| H   | 3.52051300  | 3.45547200  | 0.05226300  |
| C   | 1.40825100  | 2.95833400  | 0.14515600  |
| H   | 0.94172300  | 3.93365400  | 0.20275300  |
| C   | -1.55708900 | 2.93572200  | -0.14878600 |
| H   | -1.50694500 | 3.56489200  | 0.75305800  |
| H   | -1.18096500 | 3.55982800  | -0.97219900 |
| C   | -2.95940400 | 1.09488100  | -0.39179900 |
| H   | -3.81730800 | 0.47039600  | -0.59830000 |
| C   | -2.94064400 | 2.44213800  | -0.41860400 |
| H   | -3.78247300 | 3.09154700  | -0.62699000 |
| H   | 0.04658100  | -2.41736300 | 0.02017100  |
| H   | 3.63953600  | 0.94720800  | 0.83427900  |
| N   | -2.34243600 | -1.70997300 | 0.07976500  |
| N   | 2.36294700  | -1.64697000 | -0.15988100 |
| C   | -2.18220200 | -3.11286600 | -0.29044200 |
| H   | -1.70601400 | -3.71306900 | 0.50002600  |

|   |             |             |             |
|---|-------------|-------------|-------------|
| H | -3.17619100 | -3.52974600 | -0.47396700 |
| H | -1.60285500 | -3.20068500 | -1.21237800 |
| C | 2.19804100  | -2.92375500 | -0.85068700 |
| H | 3.17160400  | -3.22420500 | -1.24946100 |
| H | 1.84365200  | -3.72817700 | -0.18792900 |
| H | 1.50846500  | -2.81593500 | -1.69031100 |
| C | 3.53461100  | -1.60953000 | 0.72422000  |
| H | 3.71391000  | -2.62177700 | 1.10260400  |
| H | 4.44065800  | -1.27535700 | 0.20588500  |
| H | 3.34833200  | -0.97106700 | 1.58779800  |
| C | -3.44101300 | -1.49909800 | 1.03468000  |
| H | -4.41284500 | -1.62423600 | 0.54509900  |
| H | -3.36356300 | -2.23875400 | 1.84260000  |
| H | -3.39001000 | -0.50857100 | 1.48340700  |

### Allene 15H B3LYP/6-31G\*

|     |             |             |             |
|-----|-------------|-------------|-------------|
| 1 1 |             |             |             |
| C   | -1.59548400 | -0.13124100 | 0.23492600  |
| C   | -1.24760600 | 1.29325800  | 0.20983600  |
| C   | 0.00494600  | 1.89987500  | 0.26109500  |
| C   | -0.70449300 | -1.17705500 | 0.50623500  |
| C   | 1.27309200  | 1.31909700  | 0.25528300  |
| C   | 0.72983100  | -1.14610200 | 0.60739200  |
| C   | 1.61884400  | -0.09385800 | 0.31037200  |
| C   | -2.44520700 | 2.04799500  | 0.11909400  |
| H   | -2.46795200 | 3.12922400  | 0.10017300  |
| C   | -3.53611100 | 1.20124600  | 0.03647500  |
| C   | -3.04902600 | -0.18777900 | 0.07368600  |
| C   | 3.05967300  | -0.16728500 | 0.13789800  |
| C   | 2.47332800  | 2.07252900  | 0.18705100  |
| C   | 3.56157300  | 1.21553600  | 0.11507200  |
| C   | 1.16381100  | -2.45320100 | 1.11903700  |
| H   | 2.17988400  | -2.67620100 | 1.41180600  |
| C   | 0.11790800  | -3.27947500 | 1.27528800  |
| H   | 0.14707800  | -4.28766100 | 1.67187200  |
| C   | -1.13941100 | -2.60156800 | 0.83312600  |
| H   | -1.92632400 | -2.63456400 | 1.59702500  |
| H   | -1.53935200 | -3.11308200 | -0.05483500 |
| C   | -3.81491900 | -1.33489800 | -0.10043600 |
| H   | -3.28033500 | -2.27456700 | -0.12533900 |
| C   | -5.19643100 | -1.47820400 | -0.27581300 |
| C   | -6.21076700 | -0.50212300 | -0.31335900 |
| C   | -4.89763200 | 1.64796000  | -0.06490800 |
| C   | -6.06866300 | 0.90028300  | -0.20742200 |
| H   | 2.50375800  | 3.15359000  | 0.15954100  |
| C   | 4.92927600  | 1.63698000  | 0.02727600  |
| C   | 6.08182100  | 0.86690300  | -0.16035300 |
| C   | 3.78343600  | -1.32336500 | -0.14602700 |
| H   | 3.20533700  | -2.23661900 | -0.24410700 |
| C   | 5.15239900  | -1.48563500 | -0.36964000 |

|   |             |             |             |
|---|-------------|-------------|-------------|
| C | 6.18870700  | -0.52754600 | -0.35743200 |
| C | 5.33316700  | 3.04031500  | 0.13369500  |
| H | 4.64402800  | 3.86028700  | 0.29190600  |
| C | 6.67266100  | 3.14725400  | 0.02427800  |
| H | 7.24926700  | 4.06357100  | 0.07502900  |
| C | 7.44929100  | -1.22254500 | -0.61641800 |
| H | 8.41463900  | -0.73200200 | -0.65834400 |
| C | 7.22577500  | -2.54107400 | -0.79643900 |
| H | 7.97775700  | -3.29301500 | -1.00640900 |
| C | -5.26729200 | 3.06494700  | -0.02686200 |
| H | -4.55891800 | 3.87616200  | 0.08279100  |
| C | -6.60410100 | 3.19939500  | -0.13792300 |
| H | -7.15755100 | 4.13122700  | -0.13547600 |
| C | -7.49110800 | -1.18430000 | -0.50000000 |
| H | -8.44600000 | -0.67572000 | -0.56208500 |
| C | -7.29943600 | -2.51733500 | -0.58409900 |
| H | -8.07062200 | -3.26601200 | -0.72428900 |
| C | -7.24380700 | 1.85274500  | -0.26560300 |
| H | -7.80688700 | 1.75575300  | -1.20600900 |
| H | -7.96881900 | 1.66511300  | 0.54072700  |
| C | -5.84282000 | -2.83781800 | -0.45642100 |
| H | -5.64442500 | -3.50773300 | 0.39408400  |
| H | -5.46092200 | -3.36026700 | -1.34694700 |
| C | 5.76464300  | -2.84024600 | -0.66809900 |
| H | 5.56441300  | -3.57221600 | 0.12892200  |
| H | 5.35632600  | -3.28096900 | -1.59059500 |
| C | 7.27927400  | 1.79391400  | -0.17652500 |
| H | 8.00397900  | 1.54786900  | 0.61417900  |
| H | 7.83466700  | 1.73337000  | -1.12443200 |
| H | -0.00789500 | 2.98899000  | 0.25079600  |

**Allene 16H B3LYP/6-31G\***

|     |             |             |            |
|-----|-------------|-------------|------------|
| 1 1 |             |             |            |
| C   | 1.58363200  | 0.36171800  | 0.00012100 |
| C   | 1.24798200  | -1.08545000 | 0.00012300 |
| C   | -0.01624000 | -1.67555500 | 0.00011900 |
| C   | 0.73461400  | 1.43105100  | 0.00013300 |
| C   | -1.26668800 | -1.06235000 | 0.00012400 |
| C   | -0.72760400 | 1.45136200  | 0.00011900 |
| C   | -1.60056800 | 0.38337700  | 0.00014400 |
| C   | 2.45285500  | -1.82576800 | 0.00010000 |
| H   | 2.49493100  | -2.90973600 | 0.00008100 |
| C   | 3.53613600  | -0.93833600 | 0.00009200 |
| C   | 3.04029100  | 0.41092100  | 0.00011000 |
| C   | -3.05370200 | 0.43487900  | 0.00015800 |
| C   | -2.47725400 | -1.80445800 | 0.00013600 |
| H   | -2.51970200 | -2.88830200 | 0.00018400 |
| C   | -3.55172000 | -0.91743400 | 0.00017100 |
| C   | -1.12752700 | 2.85743600  | 0.00010000 |
| H   | -2.15592000 | 3.19041500  | 0.00006900 |



|   |             |             |             |
|---|-------------|-------------|-------------|
| C | -0.05190400 | 3.66555500  | 0.00005500  |
| H | -0.07542400 | 4.74957800  | -0.00006300 |
| C | 1.22038000  | 2.87036800  | 0.00008500  |
| H | 1.84380200  | 3.08896800  | 0.87936400  |
| H | 1.84376300  | 3.08888900  | -0.87927100 |
| C | 4.11271100  | 1.29657300  | 0.00001000  |
| H | 4.08855500  | 2.37842200  | 0.00009700  |
| C | -4.13777900 | 1.31205200  | -0.00003500 |
| H | -4.12863300 | 2.39399800  | -0.00001700 |
| C | -5.33644300 | 0.54590300  | -0.00006900 |
| C | -4.97926200 | -0.89017300 | 0.00006900  |
| C | 4.95957600  | -0.90667900 | 0.00000600  |
| C | 5.31669600  | 0.53193100  | -0.00005800 |
| C | -5.82669100 | -1.98674900 | 0.00006400  |
| H | -5.34036800 | -2.96069200 | 0.00019300  |
| C | 5.81390000  | -2.00202400 | -0.00003400 |
| H | 5.33044300  | -2.97743900 | 0.00002900  |
| C | 7.21434400  | -2.02178500 | -0.00013600 |
| H | 7.66918400  | -3.00893600 | -0.00014500 |
| C | 8.10198200  | -0.94462500 | -0.00021800 |
| H | 9.15659700  | -1.21101600 | -0.00028400 |
| C | -7.23060100 | -2.01164200 | -0.00010300 |
| H | -7.68080300 | -3.00096200 | -0.00008100 |
| C | -8.11953800 | -0.94006900 | -0.00027300 |
| H | -9.17371500 | -1.20796800 | -0.00037000 |
| C | -6.62516200 | 1.09447900  | -0.00019600 |
| H | -6.66913500 | 2.18228500  | -0.00024100 |
| C | -7.85323700 | 0.43918000  | -0.00030600 |
| H | -8.72854800 | 1.08377900  | -0.00043500 |
| C | 6.60038600  | 1.08311400  | -0.00016600 |
| H | 6.64176400  | 2.17105900  | -0.00020900 |
| C | 7.83369900  | 0.43056300  | -0.00022900 |
| H | 8.70656300  | 1.07837800  | -0.00030400 |
| H | -0.02692100 | -2.76490200 | 0.00010400  |

**Allene 17H B3LYP/6-31G\***

|     |             |             |             |
|-----|-------------|-------------|-------------|
| 1 1 |             |             |             |
| C   | -1.58630600 | -0.83372200 | -0.00026700 |
| C   | -1.25037400 | 0.61124300  | -0.00028800 |
| C   | 0.01371300  | 1.19944900  | -0.00030300 |
| C   | -0.73490200 | -1.90329500 | -0.00021400 |
| C   | 1.26524600  | 0.58776400  | -0.00022700 |
| C   | 0.72448500  | -1.92357800 | -0.00018900 |
| C   | 1.59951800  | -0.85579000 | -0.00019700 |
| C   | -2.45914200 | 1.34987700  | -0.00026900 |
| H   | -2.49251100 | 2.43328300  | -0.00029900 |
| C   | -3.54482600 | 0.46679000  | -0.00024700 |
| C   | -3.04025300 | -0.88359900 | -0.00025100 |
| C   | 3.05140500  | -0.90752000 | -0.00007900 |
| C   | 2.47830900  | 1.32825000  | -0.00019600 |

|   |              |             |             |
|---|--------------|-------------|-------------|
| H | 2.51110400   | 2.41150400  | -0.00027100 |
| C | 3.55708000   | 0.44625100  | -0.00007800 |
| C | 1.12491800   | -3.33075600 | -0.00021500 |
| H | 2.15372100   | -3.66262100 | -0.00019200 |
| C | 0.04999700   | -4.13925500 | -0.00015300 |
| H | 0.07327400   | -5.22336000 | -0.00018600 |
| C | -1.22159900  | -3.34228100 | -0.00009900 |
| H | -1.84615300  | -3.55952300 | 0.87895800  |
| H | -1.84643100  | -3.55966500 | -0.87890700 |
| C | -4.10577700  | -1.77285800 | -0.00014000 |
| H | -4.07655300  | -2.85473000 | -0.00016600 |
| C | 4.12833300   | -1.78751300 | -0.00002300 |
| H | 4.11514300   | -2.86958900 | -0.00003400 |
| C | 5.33394700   | -1.02716500 | 0.00011500  |
| C | 4.99091300   | 0.40798600  | -0.00002800 |
| C | -4.97550800  | 0.42265900  | -0.00011600 |
| C | -5.31651000  | -1.01503200 | -0.00006700 |
| C | 5.86412100   | 1.48721700  | -0.00001000 |
| C | 6.61042000   | -1.60391300 | 0.00023500  |
| H | 6.62697200   | -2.69362600 | 0.00028800  |
| C | -5.85579000  | 1.49958800  | -0.00003100 |
| C | -6.58876900  | -1.59517200 | 0.00005400  |
| H | -6.60202800  | -2.68494800 | 0.00007400  |
| C | 7.29058400   | 1.50258400  | 0.00006200  |
| C | 8.17153600   | 0.40651700  | 0.00013800  |
| C | 7.84785200   | -0.98142800 | 0.00023300  |
| C | -7.27948300  | 1.50934800  | 0.00008900  |
| C | -8.15781100  | 0.40805000  | 0.00017500  |
| C | -7.83039400  | -0.97641300 | 0.00017200  |
| C | 9.63042600   | 0.51958600  | 0.00018900  |
| H | 10.16731800  | 1.46011700  | 0.00015700  |
| C | 10.19807500  | -0.70314600 | 0.00031800  |
| H | 11.26193700  | -0.91086900 | 0.00035000  |
| C | -7.71807500  | 2.90797800  | 0.00011800  |
| H | -8.75597000  | 3.21731000  | 0.00023700  |
| C | -6.65740300  | 3.73551100  | 0.00001100  |
| H | -6.68927700  | 4.81868900  | -0.00001800 |
| C | -9.61708800  | 0.51762100  | 0.00031600  |
| H | -10.15654900 | 1.45664500  | 0.00032600  |
| C | -10.18110900 | -0.70693800 | 0.00052900  |
| H | -11.24424800 | -0.91825100 | 0.00066300  |
| C | 9.14498500   | -1.76796200 | 0.00025400  |
| H | 9.22204200   | -2.42675900 | 0.87822600  |
| H | 9.22212700   | -2.42664000 | -0.87782500 |
| C | -9.12420700  | -1.76755300 | 0.00034500  |
| H | -9.19902500  | -2.42667700 | 0.87831400  |
| H | -9.19930500  | -2.42656700 | -0.87770700 |
| C | -5.38358500  | 2.94186200  | -0.00006800 |
| H | -4.76051800  | 3.15873100  | -0.87957600 |
| H | -4.76039500  | 3.15872100  | 0.87934000  |
| C | 5.38652200   | 2.92796400  | 0.00001500  |
| H | 4.76272400   | 3.14301700  | -0.87948300 |

|   |            |            |             |
|---|------------|------------|-------------|
| H | 4.76265000 | 3.14296300 | 0.87945700  |
| C | 7.72217300 | 2.90288800 | 0.00006800  |
| H | 8.75861700 | 3.21709600 | 0.00013900  |
| C | 6.65783400 | 3.72580600 | 0.00005700  |
| H | 6.68570200 | 4.80913900 | 0.00005900  |
| H | 0.02473800 | 2.28921300 | -0.00034800 |

**Allene 18H B3LYP/6-31G\***

1 1

|   |             |             |             |
|---|-------------|-------------|-------------|
| C | -1.58748300 | -1.01086400 | -0.01988400 |
| C | -1.25372000 | 0.43496400  | -0.02091400 |
| C | 0.01486100  | 1.02027200  | -0.02576400 |
| C | -0.73351200 | -2.07698400 | -0.02567400 |
| C | 1.26194300  | 0.40608100  | -0.02554700 |
| C | 0.72522500  | -2.11249900 | -0.02956700 |
| C | 1.60046300  | -1.03239100 | -0.02100100 |
| C | -2.46388800 | 1.16695500  | -0.01877200 |
| H | -2.49799300 | 2.25088100  | -0.02039300 |
| C | -3.55132400 | 0.28219900  | -0.01555800 |
| C | -3.04235300 | -1.06559900 | -0.01661300 |
| C | 3.04252700  | -1.08396500 | -0.01014500 |
| C | 2.48055900  | 1.15147400  | -0.02488400 |
| H | 2.50872700  | 2.23522500  | -0.02748200 |
| C | 3.55432000  | 0.27176900  | -0.01590900 |
| C | 1.12291900  | -3.49714000 | -0.05115600 |
| H | 2.15116700  | -3.82158600 | -0.08570800 |
| C | 0.03090800  | -4.32965800 | -0.04223500 |
| C | -1.23658500 | -3.50782800 | -0.03562000 |
| H | -1.85995800 | -3.72227200 | 0.84406400  |
| H | -1.86297000 | -3.70353800 | -0.91720200 |
| C | -4.10872900 | -1.95621400 | -0.01408600 |
| H | -4.07932100 | -3.03868300 | -0.01341000 |
| C | 4.12485300  | -1.96299500 | 0.01091400  |
| H | 4.11029800  | -3.04547500 | 0.02827800  |
| C | 5.33044500  | -1.20590300 | 0.01580500  |
| C | 4.99543700  | 0.22530300  | -0.00300600 |
| C | -4.98361000 | 0.23206300  | -0.01192100 |
| C | -5.32146900 | -1.20126000 | -0.01083300 |
| C | 5.87071100  | 1.29875700  | -0.00875500 |
| C | 6.61405800  | -1.77616600 | 0.03708800  |
| H | 6.63579300  | -2.86628000 | 0.05288400  |
| C | -5.87008000 | 1.30530400  | -0.00784100 |
| C | -6.59810600 | -1.77550700 | -0.00506000 |
| H | -6.61624300 | -2.86590000 | -0.00230800 |
| C | 7.29676200  | 1.33647000  | -0.00008600 |
| C | 8.18601300  | 0.23637000  | 0.02447600  |
| C | 7.84385200  | -1.14904500 | 0.04031100  |
| C | -7.28914600 | 1.33653200  | -0.00267600 |
| C | -8.17810500 | 0.22759600  | -0.00240200 |
| C | -7.83401300 | -1.15288200 | -0.00286900 |

|   |              |             |             |
|---|--------------|-------------|-------------|
| C | 9.62405500   | 0.35653800  | 0.04580100  |
| H | 10.15244800  | 1.29913500  | 0.05917600  |
| C | 10.21353200  | -0.88544400 | 0.05869100  |
| C | -7.72940200  | 2.71693400  | 0.01017300  |
| H | -8.76615000  | 3.02071500  | 0.03086900  |
| C | -6.65209800  | 3.56342900  | -0.00081600 |
| C | -9.61424900  | 0.34852000  | 0.00628500  |
| H | -10.14367300 | 1.29026700  | 0.02328600  |
| C | -10.20312100 | -0.89580200 | -0.00232000 |
| C | 9.13708600   | -1.94531800 | 0.07141100  |
| H | 9.19298700   | -2.57793700 | 0.96830100  |
| H | 9.21751800   | -2.61908300 | -0.79308800 |
| C | -9.12431100  | -1.95281600 | 0.00655100  |
| H | -9.18830400  | -2.59682600 | 0.89479600  |
| H | -9.19626200  | -2.61544900 | -0.86726400 |
| C | -5.38208400  | 2.74243100  | 0.00022000  |
| H | -4.75758800  | 2.95540800  | -0.87756600 |
| H | -4.76148300  | 2.93873800  | 0.88462100  |
| C | 5.37586400   | 2.73360400  | -0.03899400 |
| H | 4.76073000   | 2.91663300  | -0.93022400 |
| H | 4.74342200   | 2.95512600  | 0.83128200  |
| C | 7.72533300   | 2.71878600  | -0.02855900 |
| H | 8.76024700   | 3.02928700  | -0.04791900 |
| C | 6.64283500   | 3.55917100  | -0.03833500 |
| H | 0.02745500   | 2.11061100  | -0.02812400 |
| N | 0.02403700   | -5.68881700 | -0.00645000 |
| C | 1.29360900   | -6.39847300 | -0.07797500 |
| H | 1.13028500   | -7.45221500 | 0.15903100  |
| H | 1.75122300   | -6.32876600 | -1.07588300 |
| H | 1.99241300   | -5.98493900 | 0.65568100  |
| C | -1.17612900  | -6.45651500 | -0.31050600 |
| H | -1.14606900  | -7.40589500 | 0.23259000  |
| H | -2.06635500  | -5.91356600 | 0.01015600  |
| H | -1.26902700  | -6.67655100 | -1.38501600 |
| N | -11.52846600 | -1.19140900 | -0.04820300 |
| N | -6.64973600  | 4.92726200  | -0.05383700 |
| N | 6.63437900   | 4.92358200  | -0.00385400 |
| N | 11.54139600  | -1.18174900 | 0.02565000  |
| C | -12.49255100 | -0.10207800 | 0.02476400  |
| H | -12.52471800 | 0.35616100  | 1.02421600  |
| H | -12.23587400 | 0.67154300  | -0.70551900 |
| H | -13.48656500 | -0.48462200 | -0.21682000 |
| C | -12.01701700 | -2.53266600 | 0.24420200  |
| H | -11.31554600 | -3.28258400 | -0.12573200 |
| H | -12.16815800 | -2.69672800 | 1.32206400  |
| H | -12.97297300 | -2.68734500 | -0.26390800 |
| C | -7.92520900  | 5.62253900  | 0.03164700  |
| H | -7.77629400  | 6.67916500  | -0.20247400 |
| H | -8.62431100  | 5.20451800  | -0.69946700 |
| H | -8.37790400  | 5.54373300  | 1.03199800  |
| C | -5.45950100  | 5.68675900  | 0.30202800  |
| H | -4.56386400  | 5.18587000  | -0.07114500 |

|   |             |             |             |
|---|-------------|-------------|-------------|
| H | -5.51011700 | 6.67445400  | -0.16498100 |
| H | -5.35447100 | 5.82438100  | 1.38994200  |
| C | 5.44491800  | 5.67455800  | -0.37972400 |
| H | 5.48363700  | 6.66502900  | 0.08277300  |
| H | 5.35444400  | 5.80612400  | -1.46968600 |
| H | 4.54712100  | 5.17036000  | -0.01666400 |
| C | 7.90725900  | 5.62402100  | -0.08565800 |
| H | 8.36842200  | 5.53780200  | -1.08150600 |
| H | 7.75136600  | 6.68218300  | 0.13694700  |
| H | 8.60234500  | 5.21643100  | 0.65503300  |
| C | 12.02710800 | -2.51299700 | 0.36378500  |
| H | 11.33327400 | -3.27449800 | 0.00301200  |
| H | 12.99163600 | -2.67961200 | -0.12416400 |
| H | 12.16105300 | -2.64802100 | 1.44822400  |
| C | 12.50190600 | -0.08982700 | 0.09474000  |
| H | 13.49875400 | -0.47223000 | -0.13590400 |
| H | 12.24835800 | 0.67530800  | -0.64553900 |
| H | 12.52639600 | 0.38004700  | 1.08937500  |

**Allene 19H B3LYP/6-31G\***

1 1

|   |             |             |             |
|---|-------------|-------------|-------------|
| C | 1.59235700  | 0.95558600  | -0.08535200 |
| C | 1.24923100  | -0.49063500 | -0.06805000 |
| C | -0.00992800 | -1.08230800 | -0.00704100 |
| C | 0.72015900  | 2.03303300  | -0.04466600 |
| C | -1.26372100 | -0.47184700 | 0.05374900  |
| C | -0.71102500 | 2.05230900  | 0.02495200  |
| C | -1.60507500 | 0.97506000  | 0.07009200  |
| C | 2.45546500  | -1.23291900 | -0.12550500 |
| H | 2.48669500  | -2.31655200 | -0.12443400 |
| C | 3.53908100  | -0.34963000 | -0.17693700 |
| C | 3.01723700  | 1.00499900  | -0.15299400 |
| C | -3.02714500 | 1.02711900  | 0.13966700  |
| C | -2.46758100 | -1.21450300 | 0.11261800  |
| H | -2.49914400 | -2.29779500 | 0.11202100  |
| C | -3.54955200 | -0.32912000 | 0.16464400  |
| C | -1.12386700 | 3.45885600  | 0.04265700  |
| H | -2.15454200 | 3.78216300  | 0.09084100  |
| C | -0.05528100 | 4.27397000  | -0.01029200 |
| H | -0.07831500 | 5.35788100  | -0.01133200 |
| C | 1.20995000  | 3.46969300  | -0.07005700 |
| H | 1.87765700  | 3.68573100  | 0.77717700  |
| H | 1.79286900  | 3.68351000  | -0.97823500 |
| C | 4.10124600  | 1.89065900  | -0.20857800 |
| H | 4.07484800  | 2.97297600  | -0.21849500 |
| C | -4.12225800 | 1.90912500  | 0.19855100  |
| H | -4.10831700 | 2.99134300  | 0.21117200  |
| C | -5.30874700 | 1.15333400  | 0.24420400  |
| C | -4.96660200 | -0.28333800 | 0.22678800  |
| C | 4.95800100  | -0.29753000 | -0.23640000 |

|   |              |             |             |
|---|--------------|-------------|-------------|
| C | 5.29536400   | 1.13412800  | -0.25259800 |
| C | -5.85290800  | -1.36526700 | 0.33583900  |
| C | -6.60341500  | 1.72072800  | 0.31371900  |
| H | -6.62507000  | 2.80905000  | 0.36315700  |
| C | 5.85055000   | -1.37893500 | -0.34640500 |
| C | 6.58786200   | 1.70769100  | -0.31824400 |
| H | 6.60501100   | 2.79601700  | -0.36814800 |
| C | -7.26538000  | -1.39398200 | 0.34250600  |
| C | -8.17285000  | -0.29715000 | 0.16097900  |
| C | -7.82595000  | 1.09880700  | 0.27178300  |
| C | 7.25986000   | -1.40266300 | -0.34567000 |
| C | 8.16561000   | -0.30257100 | -0.15345100 |
| C | 7.81317300   | 1.09110400  | -0.26889800 |
| C | -9.57555500  | -0.40029900 | -0.10953700 |
| C | -10.19729900 | 0.89245400  | 0.02216100  |
| C | 7.67584800   | -2.78219100 | -0.63404900 |
| H | 8.70045000   | -3.08849400 | -0.79624600 |
| C | 6.60483700   | -3.59121600 | -0.74622100 |
| H | 6.62195400   | -4.64965900 | -0.97793600 |
| C | 9.56438600   | -0.40194100 | 0.12744700  |
| C | 10.18363800  | 0.89355300  | 0.00151500  |
| C | -9.10770000  | 1.90366200  | 0.27863200  |
| H | -9.25788700  | 2.40960600  | 1.24316500  |
| H | -9.11266800  | 2.69107000  | -0.48667800 |
| C | 9.09210600   | 1.90046100  | -0.26670800 |
| H | 9.08612800   | 2.69033800  | 0.49590100  |
| H | 9.24802200   | 2.40381400  | -1.23166300 |
| C | 5.35223200   | -2.79817800 | -0.54129900 |
| H | 4.67069400   | -2.87741100 | -1.39968300 |
| H | 4.78393900   | -3.14513700 | 0.33484200  |
| C | -5.34940300  | -2.78492000 | 0.51763300  |
| H | -4.78625700  | -3.12427200 | -0.36479500 |
| H | -4.66146800  | -2.86813700 | 1.37049500  |
| C | -7.67332700  | -2.77650200 | 0.62509800  |
| H | -8.69513500  | -3.08856700 | 0.79386100  |
| C | -6.59863700  | -3.58232100 | 0.72607700  |
| H | -6.61130700  | -4.64193000 | 0.95279400  |
| C | -10.24884600 | -1.56518800 | -0.60938700 |
| H | -9.60448300  | -2.38681500 | -0.90187200 |
| C | 10.23827600  | -1.56671200 | 0.63001400  |
| H | 9.59415200   | -2.39100600 | 0.91592500  |
| C | 11.57513300  | -1.77357500 | 0.84638600  |
| H | 11.83663400  | -2.75270400 | 1.24192800  |
| C | 12.68586500  | -0.89573500 | 0.63415200  |
| H | 13.66715700  | -1.33292800 | 0.80045300  |
| C | -11.58754900 | -1.77656800 | -0.81539500 |
| H | -11.84840200 | -2.75627400 | -1.20987900 |
| C | -12.69865100 | -0.90415200 | -0.59255700 |
| H | -13.67982600 | -1.34404500 | -0.75215600 |
| C | -11.52263700 | 1.24896800  | -0.03175100 |
| H | -11.73821000 | 2.30162400  | 0.14121200  |
| C | -12.66411900 | 0.42367700  | -0.25624100 |

|   |              |             |             |
|---|--------------|-------------|-------------|
| H | -13.62385700 | 0.92886200  | -0.17409700 |
| C | 11.50630400  | 1.25464500  | 0.06734800  |
| H | 11.72025000  | 2.30814000  | -0.10257000 |
| C | 12.64947200  | 0.43180100  | 0.30055300  |
| H | 13.60808100  | 0.94045800  | 0.22657900  |
| H | -0.01908500  | -2.17202600 | -0.00620600 |

**M052X**

**Neutral**

**Allene 1 M052X/6-31G\***

|     |             |             |             |
|-----|-------------|-------------|-------------|
| 0 1 |             |             |             |
| C   | 0.69550400  | 1.27831200  | 0.21442100  |
| C   | 1.60074200  | 0.26468500  | 0.18654200  |
| C   | 1.22053800  | -1.03604500 | -0.35973100 |
| C   | -0.69564900 | 1.27823900  | -0.21440300 |
| C   | 0.00004200  | -1.39023700 | -0.00008400 |
| C   | -1.60079200 | 0.26453100  | -0.18655900 |
| C   | -1.22039800 | -1.03613600 | 0.35980000  |
| H   | 1.06229000  | 2.24823500  | 0.53618400  |
| H   | 2.61892100  | 0.45786400  | 0.51087800  |
| H   | 1.84258900  | -1.57590100 | -1.06363100 |
| H   | -1.06251100 | 2.24811400  | -0.53623400 |
| H   | -2.61895900 | 0.45756400  | -0.51101700 |
| H   | -1.84224100 | -1.57596100 | 1.06390600  |

**Allene 2 M052X/6-31G\***

|     |             |             |             |
|-----|-------------|-------------|-------------|
| 0 1 |             |             |             |
| C   | 0.36457900  | -0.61066000 | -0.10409600 |
| C   | 0.54038500  | 0.75632800  | -0.11387400 |
| C   | -0.56871700 | 1.64729500  | -0.42917800 |
| C   | -0.82816300 | -1.39029100 | -0.33625300 |
| C   | -1.70600600 | 1.23015600  | 0.10159200  |
| C   | -2.12362600 | -1.04807300 | -0.09002100 |
| C   | -2.44274000 | 0.22658500  | 0.54721700  |
| H   | -0.47403900 | 2.47050600  | -1.12782400 |
| H   | -0.65111100 | -2.39793500 | -0.70293200 |
| H   | -2.90449000 | -1.77068100 | -0.30638600 |
| H   | -3.14085800 | 0.29575000  | 1.37374600  |
| C   | 1.95741600  | 1.06548000  | 0.10436100  |
| H   | 2.35730700  | 2.06894600  | 0.14744500  |
| C   | 2.64943100  | -0.07907900 | 0.22666300  |
| H   | 3.71308700  | -0.17278300 | 0.39293100  |
| C   | 1.71912300  | -1.25060400 | 0.09446900  |
| H   | 1.74520900  | -1.89544100 | 0.97976200  |
| H   | 1.98479700  | -1.88118800 | -0.76202300 |

**Allene 3 M052X/6-31G\***

0 1

|   |             |             |             |
|---|-------------|-------------|-------------|
| C | -0.75859700 | -0.03502400 | -0.18586000 |
| C | -1.42836900 | 1.15805600  | -0.02781000 |
| C | -2.86110000 | 1.25312000  | -0.27818600 |
| C | -1.27875700 | -1.33521000 | -0.53475800 |
| C | -3.51084700 | 0.19494500  | 0.17566600  |
| C | -2.51364500 | -1.85294600 | -0.27891200 |
| C | -3.49345600 | -1.09049600 | 0.48791700  |
| H | -3.29832700 | 2.04222000  | -0.87903200 |
| H | -0.56788400 | -2.00566100 | -1.00976900 |
| H | -2.72602800 | -2.87093100 | -0.59139800 |
| H | -4.06139600 | -1.53521000 | 1.29723300  |
| C | -0.46388400 | 2.21270700  | 0.29593900  |
| H | -0.73305500 | 3.24434800  | 0.47634300  |
| C | 0.77146500  | 1.68974300  | 0.32226300  |
| H | 1.68289400  | 2.23248000  | 0.52930900  |
| C | 0.73170600  | 0.21452700  | -0.00188200 |
| C | 1.51517600  | -0.07701400 | -1.30364000 |
| H | 1.13080600  | 0.56223300  | -2.10194400 |
| H | 1.33086200  | -1.11582600 | -1.59836900 |
| C | 1.30113900  | -0.64669200 | 1.14728700  |
| H | 0.76632600  | -0.40793500 | 2.06945200  |
| H | 1.09582600  | -1.69825900 | 0.91802400  |
| C | 3.02340300  | 0.11277600  | -1.12390300 |
| H | 3.53453200  | -0.13478300 | -2.05755900 |
| H | 3.24291200  | 1.16423000  | -0.91397400 |
| C | 2.80955800  | -0.45993600 | 1.32159100  |
| H | 3.16820500  | -1.11441600 | 2.11985900  |
| H | 3.02214100  | 0.56672200  | 1.63699500  |
| C | 3.55243900  | -0.75741000 | 0.01764700  |
| H | 3.40843000  | -1.81257800 | -0.24230300 |
| H | 4.62636500  | -0.60351300 | 0.14697500  |

**Allene 4 M052X/6-31G\***

0 1

|   |             |             |             |
|---|-------------|-------------|-------------|
| C | -0.53144900 | 0.64463600  | 0.27348100  |
| C | -0.44533700 | -0.78080500 | -0.01724700 |
| C | 0.70891500  | -1.38198200 | 0.26581300  |
| C | 0.52767500  | 1.47431900  | 0.08191500  |
| C | 2.00221100  | -1.17054500 | 0.45386300  |
| C | 1.85906300  | 1.12451600  | -0.38148800 |
| C | 2.54574400  | -0.04717800 | -0.30578700 |
| H | 2.60203600  | -1.69884500 | 1.18819300  |
| H | 3.53589800  | -0.09888600 | -0.74929000 |
| C | -1.77645900 | -1.20277800 | -0.46949400 |
| H | -2.00601600 | -2.18470000 | -0.85700000 |
| C | -2.65566100 | -0.21773600 | -0.23176700 |
| H | -3.72184500 | -0.28061900 | -0.40067800 |
| C | -1.99680200 | 1.00689800  | 0.37751200  |
| H | -2.33150200 | 1.14690000  | 1.41213500  |
| H | -2.22288700 | 1.92856800  | -0.16365900 |



|   |            |            |             |
|---|------------|------------|-------------|
| H | 0.33560800 | 2.54117800 | 0.14512900  |
| H | 2.38129400 | 1.95034000 | -0.85563800 |

**Allene 5 M052X/6-31G\***

|     |             |             |             |
|-----|-------------|-------------|-------------|
| 0 1 |             |             |             |
| C   | -0.68232500 | -0.17379200 | 0.03869500  |
| C   | -1.38961200 | 1.06236700  | -0.27241300 |
| C   | -2.62174600 | 1.19319600  | 0.21426600  |
| C   | -1.33667900 | -1.36361700 | 0.09407200  |
| C   | -3.67106800 | 0.51860500  | 0.65712700  |
| C   | -2.75387000 | -1.61233400 | -0.11505700 |
| C   | -3.83305200 | -0.80246200 | 0.05423000  |
| H   | -0.73254100 | -2.26242400 | 0.16379400  |
| H   | -4.29984900 | 0.84614200  | 1.47889700  |
| H   | -2.96801600 | -2.62260900 | -0.45153700 |
| H   | -4.81803600 | -1.19033300 | -0.18868900 |
| C   | -0.44022400 | 1.91797300  | -0.99150100 |
| H   | -0.69604700 | 2.85934700  | -1.45613900 |
| C   | 0.78815800  | 1.38992100  | -0.88810600 |
| H   | 1.68672400  | 1.85263900  | -1.27266400 |
| C   | 0.81030000  | 0.08307000  | -0.09722100 |
| C   | 1.55052200  | -1.04554900 | -0.83393000 |
| H   | 1.10310200  | -1.18955000 | -1.82027200 |
| H   | 1.41084000  | -1.97619000 | -0.27265500 |
| C   | 1.46328200  | 0.30086100  | 1.28937700  |
| H   | 0.94972900  | 1.11815800  | 1.80130900  |
| H   | 1.30387100  | -0.60774800 | 1.88086500  |
| C   | 3.05351400  | -0.77445100 | -0.94468300 |
| H   | 3.22846000  | 0.10850500  | -1.56776800 |
| H   | 3.53853500  | -1.61377700 | -1.44888100 |
| C   | 3.67397000  | -0.55583500 | 0.43694900  |
| C   | 2.96442300  | 0.57600100  | 1.18288300  |
| H   | 3.13081400  | 1.52198300  | 0.65753900  |
| H   | 3.38712300  | 0.69405600  | 2.18352600  |
| H   | 4.74151100  | -0.34229600 | 0.34506400  |
| H   | 3.58021200  | -1.47963300 | 1.01948200  |

**Allene 6 M052X/6-31G\***

|     |             |             |             |
|-----|-------------|-------------|-------------|
| 0 1 |             |             |             |
| C   | -0.70384700 | -0.45203600 | -0.05376200 |
| C   | -1.58189400 | 0.58999800  | 0.17095100  |
| C   | -1.12445000 | 1.89574800  | 0.60235300  |
| C   | 0.73542700  | -0.43890900 | 0.01705200  |
| C   | -0.00606100 | 2.27647400  | -0.00072100 |
| C   | 1.60126700  | 0.61548900  | -0.18296200 |
| C   | 1.11863200  | 1.92511800  | -0.60322900 |
| H   | -1.59965600 | 2.43739400  | 1.41344800  |
| H   | 1.58107100  | 2.47501500  | -1.41558400 |
| C   | -2.99536900 | 0.08980100  | 0.04633300  |
| H   | -3.56663800 | 0.26283000  | 0.96585800  |

|   |             |             |             |
|---|-------------|-------------|-------------|
| C | -2.81494400 | -1.37253800 | -0.24783800 |
| H | -3.63243900 | -2.06145200 | -0.40440800 |
| C | -1.50678000 | -1.66616500 | -0.29582800 |
| H | -1.08247400 | -2.64069400 | -0.49571000 |
| C | 1.56092800  | -1.67716800 | 0.27924600  |
| H | 1.31107600  | -2.14555200 | 1.23733600  |
| H | 1.39422500  | -2.43554200 | -0.49473000 |
| C | 2.98103800  | 0.14216600  | -0.02717400 |
| H | 3.85091100  | 0.77623400  | -0.12828000 |
| C | 2.97556200  | -1.17321400 | 0.24220000  |
| H | 3.84019000  | -1.80198300 | 0.39953400  |
| H | -3.53332100 | 0.60515900  | -0.75718900 |

### Allene 7 M052X/6-31G\*

0 1

|   |             |             |             |
|---|-------------|-------------|-------------|
| C | 1.20506600  | 0.83527800  | -0.10242200 |
| C | 1.50461200  | 2.18360500  | -0.08935600 |
| C | 0.50098900  | 3.20893300  | -0.35421300 |
| C | -0.10504700 | 0.22285000  | -0.19894500 |
| C | -0.63059300 | 2.96490400  | 0.28128700  |
| C | -1.32023600 | 0.76048900  | 0.19175400  |
| C | -1.43779600 | 2.05953900  | 0.81790800  |
| H | 0.65544700  | 4.00312600  | -1.07586300 |
| H | -2.04697500 | 2.22875600  | 1.69961000  |
| C | 2.93704400  | 2.36528000  | 0.14957200  |
| H | 3.41796700  | 3.33130500  | 0.21924400  |
| C | 3.52250900  | 1.16564300  | 0.26209200  |
| H | 4.57568400  | 0.98756600  | 0.42620700  |
| C | 2.51625600  | 0.05969200  | 0.03592000  |
| C | 2.90556600  | -0.65225600 | -1.28963700 |
| H | 3.00513600  | 0.10458400  | -2.07120900 |
| H | 2.10552900  | -1.32543400 | -1.59830300 |
| C | 2.47644700  | -0.94586600 | 1.20469200  |
| H | 2.27741800  | -0.40060600 | 2.13036200  |
| H | 1.63734700  | -1.63185800 | 1.05107600  |
| C | 4.19183300  | -1.47141000 | -1.15040700 |
| H | 4.38964700  | -1.99307900 | -2.09017400 |
| H | 5.04398900  | -0.80787200 | -0.97448100 |
| C | 3.76811400  | -1.75875400 | 1.31619300  |
| H | 3.67287000  | -2.48357800 | 2.12844800  |
| H | 4.60208700  | -1.09977200 | 1.57878400  |
| C | 4.08106100  | -2.47324400 | 0.00041000  |
| H | 3.27650700  | -3.18508500 | -0.21977800 |
| H | 5.00359400  | -3.05177100 | 0.09035600  |
| C | -2.44333200 | -0.22566900 | -0.02180900 |
| C | -0.38924000 | -1.16543700 | -0.63121900 |
| H | 0.35229800  | -1.86965400 | -0.97404400 |
| C | -1.70126100 | -1.42654200 | -0.54487700 |
| H | -2.17250800 | -2.36243600 | -0.81044300 |
| C | -3.44575800 | 0.33744000  | -1.05621800 |
| H | -2.92009100 | 0.51917900  | -1.99643400 |

|   |             |             |             |
|---|-------------|-------------|-------------|
| C | -3.18351500 | -0.53054900 | 1.29862200  |
| H | -2.47779100 | -0.95595300 | 2.01595800  |
| C | -4.37935700 | -1.46158500 | 1.08513700  |
| H | -4.02925300 | -2.43935800 | 0.73884800  |
| H | -4.88726700 | -1.62847600 | 2.03826100  |
| C | -4.64313800 | -0.59094700 | -1.26498000 |
| H | -5.33751500 | -0.13763600 | -1.97675600 |
| H | -4.30587600 | -1.53349800 | -1.70877100 |
| C | -5.35255200 | -0.87691400 | 0.05983000  |
| H | -5.76607000 | 0.05876500  | 0.45325900  |
| H | -6.19297600 | -1.55733400 | -0.09715000 |
| H | -3.79813300 | 1.30739200  | -0.68816100 |
| H | -3.54709400 | 0.41583700  | 1.71516200  |

### Allene 8 M052X/6-31G\*

0 1

|   |             |             |             |
|---|-------------|-------------|-------------|
| C | -0.80217600 | -0.46175700 | -0.33891000 |
| C | -1.50762900 | 0.74887800  | 0.05371500  |
| C | -0.93923100 | 1.92354800  | -0.22381400 |
| C | 0.55697600  | -0.54005100 | -0.26384500 |
| C | 0.22884300  | 2.49831700  | -0.47396000 |
| C | 1.51060100  | 0.50763700  | 0.13885400  |
| C | 1.39683700  | 1.85952500  | 0.12359700  |
| H | 0.35221800  | 3.32167400  | -1.17144200 |
| H | 2.24236000  | 2.45414100  | 0.46161300  |
| C | -2.80306400 | 0.32709200  | 0.60178700  |
| H | -3.51493100 | 0.99794200  | 1.06058800  |
| C | -2.98868100 | -0.97657000 | 0.34963200  |
| H | -3.88651600 | -1.53453700 | 0.57720100  |
| C | -1.80055700 | -1.59931100 | -0.36004200 |
| H | -2.07667300 | -1.91969500 | -1.37168200 |
| H | -1.41648000 | -2.47872800 | 0.16344700  |
| C | 2.80855200  | -0.19251000 | 0.51867300  |
| H | 3.67751800  | 0.26209100  | 0.03526100  |
| H | 2.97888500  | -0.13629300 | 1.59990800  |
| C | 1.32597100  | -1.79103100 | -0.34576100 |
| H | 0.90264100  | -2.72431700 | -0.69097700 |
| C | 2.58022300  | -1.61411200 | 0.08556500  |
| H | 3.34099000  | -2.38021700 | 0.14313300  |

### Allene 9 M052X/6-31G\*

0 1

|   |             |            |             |
|---|-------------|------------|-------------|
| C | -1.16471600 | 0.77810200 | -0.11337100 |
| C | -1.31278300 | 2.12091200 | 0.43002300  |
| C | -0.46486100 | 3.07126900 | 0.03170800  |
| C | 0.07054400  | 0.29164900 | -0.44861300 |
| C | 0.74034000  | 3.27211200 | -0.47312000 |
| C | 1.38642200  | 0.93252500 | -0.23720100 |
| C | 1.72656500  | 2.24236400 | -0.15219200 |
| H | 0.97283000  | 4.05590500 | -1.18801000 |

|   |             |             |             |
|---|-------------|-------------|-------------|
| H | 2.76241900  | 2.50915400  | 0.03705600  |
| C | -2.54793200 | 2.14459200  | 1.21578700  |
| H | -2.87595800 | 2.98938800  | 1.80451700  |
| C | -3.23590900 | 1.02069800  | 0.98146500  |
| H | -4.22129800 | 0.81140100  | 1.37399000  |
| C | -2.49070300 | 0.03823200  | 0.08317500  |
| C | 0.37387100  | -1.08433600 | -0.87925500 |
| H | -0.36580300 | -1.76800900 | -1.26832300 |
| C | 1.67565400  | -1.35669900 | -0.74647000 |
| H | 2.13862500  | -2.30033000 | -0.99972100 |
| C | 3.91742300  | -1.52882600 | 1.40002500  |
| H | 4.20087200  | -1.65021500 | 2.44843300  |
| H | 3.49512500  | -2.48509700 | 1.07402200  |
| C | 5.14697000  | -1.19670700 | 0.55239200  |
| H | 5.89118200  | -1.99281300 | 0.63088800  |
| H | 5.61122700  | -0.28347100 | 0.94225200  |
| C | 4.75867600  | -0.97168100 | -0.91027800 |
| H | 5.63777000  | -0.69425300 | -1.49699100 |
| H | 4.38297100  | -1.90720700 | -1.33650000 |
| C | 2.85969000  | -0.43037700 | 1.27778500  |
| H | 1.96847200  | -0.67601900 | 1.86051500  |
| H | 3.26359800  | 0.50622600  | 1.67843800  |
| C | 3.69888500  | 0.12711100  | -1.03141000 |
| H | 4.14154100  | 1.06402200  | -0.68012400 |
| H | 3.40700500  | 0.27886600  | -2.07345800 |
| C | 2.44395100  | -0.17965600 | -0.19187300 |
| C | -4.56381400 | -0.89398900 | -1.08377700 |
| H | -5.25171300 | -0.26303400 | -0.51181600 |
| H | -5.02444000 | -1.05437600 | -2.06155300 |
| C | -3.68887800 | -2.02336700 | 0.99339600  |
| H | -3.52627800 | -2.98590200 | 1.48459100  |
| H | -4.34638300 | -1.44536900 | 1.64977700  |
| C | -3.22571600 | -0.17343300 | -1.25893200 |
| H | -2.58019300 | -0.77207700 | -1.91166300 |
| H | -3.36456300 | 0.79547400  | -1.74433200 |
| C | -2.34336900 | -1.30909000 | 0.82581400  |
| H | -1.87400900 | -1.12753700 | 1.79577500  |
| H | -1.67778500 | -1.96933100 | 0.26832900  |
| C | -4.37361900 | -2.22809900 | -0.35991500 |
| H | -5.33444000 | -2.73115300 | -0.22751100 |
| H | -3.75090800 | -2.88408700 | -0.97956000 |

**Allene 10 M052X/6-31G\***

|     |             |             |             |
|-----|-------------|-------------|-------------|
| 0 1 |             |             |             |
| C   | -1.55595100 | 0.60179700  | 0.32903600  |
| C   | -1.23498000 | -0.73894600 | -0.13813100 |
| C   | 0.00000200  | -1.24800500 | 0.00001800  |
| C   | -0.68939600 | 1.64478000  | 0.21599200  |
| C   | 1.23498900  | -0.73894800 | 0.13813700  |
| C   | 0.68938600  | 1.64478200  | -0.21597300 |
| C   | 1.55594300  | 0.60180300  | -0.32902300 |

|   |             |             |             |
|---|-------------|-------------|-------------|
| H | -1.09600300 | 2.63353400  | 0.40794800  |
| H | 1.09598800  | 2.63353700  | -0.40793400 |
| C | -2.49774500 | -1.32682200 | -0.60601100 |
| H | -2.56713400 | -2.28377200 | -1.10298700 |
| C | -3.52357200 | -0.55068200 | -0.22527300 |
| H | -4.57026500 | -0.78086500 | -0.36939700 |
| C | -3.05498000 | 0.68864900  | 0.51241800  |
| H | -3.45727900 | 1.61411200  | 0.09338800  |
| H | -3.36228700 | 0.64822700  | 1.56428500  |
| C | 3.05497000  | 0.68866100  | -0.51243000 |
| H | 3.36225100  | 0.64825500  | -1.56430500 |
| H | 3.45727800  | 1.61411700  | -0.09339400 |
| C | 2.49775700  | -1.32679700 | 0.60603800  |
| H | 2.56715300  | -2.28373300 | 1.10304000  |
| C | 3.52358000  | -0.55069400 | 0.22521300  |
| H | 4.57027600  | -0.78089000 | 0.36929800  |

### Allene 11 M052X/6-31G\*

0 1

|   |             |             |             |
|---|-------------|-------------|-------------|
| C | -1.56456700 | -0.05185100 | 0.29278900  |
| C | -1.20858800 | -1.39330600 | -0.15199500 |
| C | 0.03093900  | -1.88973500 | -0.00902500 |
| C | -0.70957400 | 0.99872000  | 0.19542900  |
| C | 1.26006400  | -1.36307900 | 0.14044200  |
| C | 0.70030900  | 1.01344800  | -0.20803600 |
| C | 1.58707000  | -0.02089300 | -0.30678000 |
| C | -2.45478000 | -2.01800700 | -0.61845600 |
| H | -2.49512600 | -2.98755600 | -1.09372600 |
| C | -3.50228900 | -1.26089900 | -0.26255900 |
| H | -4.54222900 | -1.51836400 | -0.40914100 |
| C | -3.06938600 | 0.01127900  | 0.43969500  |
| H | -3.48325500 | 0.90821900  | -0.02887800 |
| H | -3.40138900 | 0.01658700  | 1.48486700  |
| C | 3.09224600  | 0.08401900  | -0.42993800 |
| H | 3.44475500  | 0.10074000  | -1.46820800 |
| H | 3.47212600  | 0.98791700  | 0.05344800  |
| C | 2.51508900  | -1.96076700 | 0.61827700  |
| H | 2.57289500  | -2.92987100 | 1.09270500  |
| C | 3.54787900  | -1.17796700 | 0.27483100  |
| H | 4.59214200  | -1.41111000 | 0.43117500  |
| C | 1.06857900  | 2.42766400  | -0.37796200 |
| H | 2.04381500  | 2.74715800  | -0.71778200 |
| C | 0.05300000  | 3.23406900  | -0.05053800 |
| H | 0.06931400  | 4.31456800  | -0.08319500 |
| C | -1.14981000 | 2.44151300  | 0.37773300  |
| H | -2.03160900 | 2.68230000  | -0.22515100 |
| H | -1.41852500 | 2.64416900  | 1.42044500  |

### Allene 12 M052X/6-31G\*

0 1

|   |             |             |             |
|---|-------------|-------------|-------------|
| C | 1.58695200  | 0.01569000  | -0.31075400 |
| C | 1.27250800  | -1.32270200 | 0.14216000  |
| C | 0.04286700  | -1.83933600 | -0.00426100 |
| C | 0.68557900  | 1.05336500  | -0.21311400 |
| C | -1.20297600 | -1.36890700 | -0.14403100 |
| C | -0.70466800 | 1.02672200  | 0.21229400  |
| C | -1.56049100 | -0.03688900 | 0.30816000  |
| C | 2.56271900  | -1.96089000 | 0.62220200  |
| H | 2.68279500  | -2.96662900 | 0.21721900  |
| C | 3.60392100  | -0.99115800 | 0.11111700  |
| H | 4.66652000  | -1.15655700 | 0.22675200  |
| C | 3.04777600  | 0.10201600  | -0.43515300 |
| C | -3.02402100 | 0.00042100  | 0.44095900  |
| C | -2.47390900 | -2.04146500 | -0.62956700 |
| H | -2.52212600 | -2.11442700 | -1.72300700 |
| C | -3.54426800 | -1.10796800 | -0.10944700 |
| H | -4.60124200 | -1.30958800 | -0.22007300 |
| H | -2.56546700 | -3.05426200 | -0.23465900 |
| H | 2.61256700  | -2.04356100 | 1.71497300  |
| H | 3.59037800  | 0.94886900  | -0.83169700 |
| H | -3.58918400 | 0.82716100  | 0.84905400  |
| C | 1.04339100  | 2.46819900  | -0.38878300 |
| H | 2.01564100  | 2.79556000  | -0.72927200 |
| C | 0.02292900  | 3.26816100  | -0.05715500 |
| H | 0.02937700  | 4.34854900  | -0.09161500 |
| C | -1.16485500 | 2.46325800  | 0.38808700  |
| H | -2.05738600 | 2.68219100  | -0.20724100 |
| H | -1.42259900 | 2.67159500  | 1.43293200  |

### Allene 13 M052X/6-31G\*

0 1

|   |             |             |             |
|---|-------------|-------------|-------------|
| C | 0.47311900  | 2.26452800  | 0.54747300  |
| C | 1.22665100  | 1.23382000  | 1.01020200  |
| C | 1.20087600  | -0.06755700 | 0.35113300  |
| C | -0.47343300 | 2.26460000  | -0.54713100 |
| C | 0.00008700  | -0.54636900 | -0.00033300 |
| C | -1.22681900 | 1.23392100  | -1.01015100 |
| C | -1.20087700 | -0.06756300 | -0.35125000 |
| H | 0.62919200  | 3.23246900  | 1.01339200  |
| H | 1.91777100  | 1.41506100  | 1.82928100  |
| H | -0.62957200 | 3.23262600  | -1.01285800 |
| H | -1.91783700 | 1.41522800  | -1.82930000 |
| N | 2.40462700  | -0.75937800 | 0.18857600  |
| N | -2.40444900 | -0.75947700 | -0.18838200 |
| C | 3.58533000  | 0.01294000  | -0.16188200 |
| H | 4.47600600  | -0.57885300 | 0.05509400  |
| H | 3.59874800  | 0.28319700  | -1.22702300 |
| H | 3.63232100  | 0.92801900  | 0.42319200  |
| C | 2.30834600  | -2.00126900 | -0.55188300 |
| H | 3.24889800  | -2.54506900 | -0.45057200 |
| H | 1.49255600  | -2.59495000 | -0.14108000 |

|   |             |             |             |
|---|-------------|-------------|-------------|
| H | 2.10666100  | -1.83817600 | -1.61903900 |
| C | -3.58548900 | 0.01254500  | 0.16150700  |
| H | -3.63239400 | 0.92763900  | -0.42354300 |
| H | -4.47593000 | -0.57943800 | -0.05591800 |
| H | -3.59949000 | 0.28275500  | 1.22665000  |
| C | -2.30800000 | -2.00130900 | 0.55213100  |
| H | -3.24843000 | -2.54530700 | 0.45074700  |
| H | -1.49203400 | -2.59482500 | 0.14142700  |
| H | -2.10646300 | -1.83812300 | 1.61929700  |

**Allene 14 M052X/6-31G\***

|     |             |             |             |
|-----|-------------|-------------|-------------|
| O 1 |             |             |             |
| C   | 0.31335600  | 1.61231200  | -0.31275000 |
| C   | 1.39435700  | 0.75490500  | -0.39372600 |
| C   | 1.38662400  | -0.56221300 | 0.21423700  |
| C   | -0.97108600 | 1.37148900  | 0.28193100  |
| C   | 0.24204300  | -1.26284200 | 0.14306100  |
| C   | -1.61030800 | 0.17277100  | 0.49330100  |
| C   | -1.07242200 | -1.07642800 | -0.02400100 |
| C   | 2.57488400  | 1.51380000  | -0.94508000 |
| H   | 3.39538800  | 1.51867800  | -0.21811800 |
| C   | 2.02642900  | 2.89102100  | -1.18301100 |
| H   | 2.60112300  | 3.70386400  | -1.60305200 |
| C   | 0.73976500  | 2.93290000  | -0.81020100 |
| H   | 0.08805000  | 3.79439700  | -0.86565800 |
| C   | -1.86330500 | 2.47541400  | 0.80297200  |
| H   | -1.35824900 | 3.08714000  | 1.55823800  |
| H   | -2.16625300 | 3.15584400  | -0.00167900 |
| C   | -2.88604000 | 0.41674000  | 1.17782000  |
| H   | -3.56755600 | -0.36973900 | 1.47117800  |
| C   | -3.04525400 | 1.73669800  | 1.36536200  |
| H   | -3.88471900 | 2.22250300  | 1.84164300  |
| H   | 2.96430800  | 1.06724300  | -1.86665900 |
| N   | 2.54183500  | -0.99039800 | 0.92729400  |
| N   | -1.93560400 | -2.00333800 | -0.61552600 |
| C   | 3.59288900  | -1.47199000 | 0.03484200  |
| H   | 4.49387500  | -1.67426200 | 0.61668800  |
| H   | 3.28846700  | -2.39368700 | -0.48331100 |
| H   | 3.83206900  | -0.72118500 | -0.71591300 |
| C   | 2.22170000  | -2.01105800 | 1.91054400  |
| H   | 1.81685300  | -2.92085100 | 1.44279100  |
| H   | 3.12877900  | -2.26321800 | 2.46177700  |
| H   | 1.47765900  | -1.62623100 | 2.60660900  |
| C   | -1.29390100 | -3.19164700 | -1.14428500 |
| H   | -0.62497000 | -3.59864000 | -0.38700000 |
| H   | -2.06349400 | -3.92425100 | -1.39279700 |
| H   | -0.70193900 | -2.98244400 | -2.04539600 |
| C   | -2.96002400 | -1.47982200 | -1.50787300 |
| H   | -2.54488300 | -1.20239700 | -2.48656600 |
| H   | -3.72175400 | -2.24594800 | -1.66020600 |
| H   | -3.43460900 | -0.60296500 | -1.07378900 |

Allene 15 M052X/6-31G\*

0 1

|   |             |             |             |
|---|-------------|-------------|-------------|
| C | 1.59569300  | 0.08307800  | -0.30068600 |
| C | 1.19558600  | -1.25805200 | 0.11923900  |
| C | -0.02300900 | -1.78632900 | -0.13612600 |
| C | 0.71962500  | 1.14369000  | -0.30903300 |
| C | -1.23814200 | -1.23909100 | -0.36758000 |
| C | -0.70637000 | 1.15717600  | 0.00008800  |
| C | -1.59201000 | 0.09983800  | 0.09255200  |
| C | 2.37046600  | -1.89001700 | 0.68131600  |
| H | 2.35529800  | -2.87520800 | 1.12105300  |
| C | 3.47255400  | -1.12267100 | 0.44252000  |
| C | 3.06784700  | 0.11109700  | -0.27837600 |
| C | -3.05619500 | 0.13837000  | 0.19001700  |
| C | -2.45272600 | -1.83329000 | -0.88877000 |
| C | -3.52493000 | -1.05681800 | -0.55601100 |
| C | -1.10564400 | 2.57343200  | 0.06459000  |
| H | -2.11773800 | 2.89973000  | 0.23957600  |
| C | -0.07269600 | 3.38108800  | -0.19232700 |
| H | -0.10876700 | 4.46068300  | -0.23343400 |
| C | 1.16203000  | 2.58554800  | -0.48486700 |
| H | 2.00144400  | 2.83573100  | 0.17199000  |
| H | 1.49297500  | 2.77830600  | -1.51165800 |
| C | 3.85989100  | 1.05832100  | -0.85209900 |
| H | 3.35866900  | 1.82996000  | -1.42206100 |
| C | 5.28213400  | 1.16966000  | -0.83566000 |
| C | 6.22264500  | 0.35896300  | -0.24131100 |
| C | 4.82758400  | -1.47516000 | 0.80922000  |
| C | 6.00715900  | -0.83725800 | 0.51557600  |
| H | -2.48588600 | -2.80493400 | -1.35707400 |
| C | -4.90640100 | -1.36549300 | -0.85316900 |
| C | -6.05257300 | -0.74943100 | -0.41435300 |
| C | -3.78616300 | 1.02349300  | 0.92429800  |
| H | -3.22354500 | 1.73378500  | 1.51998200  |
| C | -5.20208600 | 1.12331700  | 1.05386900  |
| C | -6.19499900 | 0.36600100  | 0.47154700  |
| C | -5.28994500 | -2.47608400 | -1.73672400 |
| H | -4.58050100 | -3.12101300 | -2.23377100 |
| C | -6.62589500 | -2.54376400 | -1.83601300 |
| H | -7.19162700 | -3.25417300 | -2.42105600 |
| C | -7.49368400 | 0.89038800  | 0.91618400  |
| H | -8.44635000 | 0.48142700  | 0.60905800  |
| C | -7.31136800 | 1.92915400  | 1.74712400  |
| H | -8.08502900 | 2.50797200  | 2.23019300  |
| C | 5.13813200  | -2.66658300 | 1.61314600  |
| H | 4.39205300  | -3.34863800 | 1.99291300  |
| C | 6.46255400  | -2.76034100 | 1.80351100  |
| H | 6.97866900  | -3.53037600 | 2.35827200  |
| C | 7.55291100  | 0.92262400  | -0.50990300 |
| H | 8.47634600  | 0.48418500  | -0.15761100 |



|   |             |             |             |
|---|-------------|-------------|-------------|
| C | 7.43972800  | 2.03903300  | -1.24710200 |
| H | 8.24969200  | 2.66239800  | -1.59670400 |
| C | 7.14796500  | -1.61461400 | 1.12581300  |
| H | 7.85569900  | -1.95806100 | 0.36217800  |
| H | 7.72045700  | -1.00450300 | 1.83430700  |
| C | 5.99273500  | 2.30630700  | -1.52855200 |
| H | 5.67362700  | 3.28000900  | -1.13867300 |
| H | 5.78185200  | 2.31541400  | -2.60449800 |
| C | -5.84445200 | 2.17925400  | 1.91957300  |
| H | -5.53425600 | 2.08208800  | 2.96676800  |
| H | -5.56157900 | 3.18970500  | 1.60204100  |
| C | -7.24501200 | -1.46227700 | -1.00494200 |
| H | -7.89565900 | -1.87322100 | -0.22406600 |
| H | -7.86348600 | -0.78660400 | -1.60718300 |

**Allene 16 M052X/6-31G\***

0 1

|   |             |             |             |
|---|-------------|-------------|-------------|
| C | -1.58773600 | 0.25742500  | 0.34552600  |
| C | -1.26976700 | -1.13901300 | -0.09389000 |
| C | 0.00964700  | -1.46709400 | -0.08934500 |
| C | -0.65579100 | 1.33234600  | 0.17355400  |
| C | 1.28570800  | -1.12392300 | -0.05417000 |
| C | 0.66168800  | 1.35029000  | -0.27874300 |
| C | 1.61743000  | 0.28144300  | -0.43359700 |
| C | -2.50308900 | -1.83910400 | -0.42053300 |
| H | -2.56098200 | -2.86756800 | -0.74063000 |
| C | -3.50667200 | -0.98865100 | -0.05916900 |
| C | -2.97152600 | 0.30175100  | 0.36494600  |
| C | 3.00033600  | 0.33070600  | -0.38577800 |
| C | 2.50684300  | -1.84108100 | 0.28667600  |
| H | 2.55088700  | -2.88111600 | 0.57011800  |
| C | 3.52229900  | -0.98021200 | -0.00072900 |
| C | 1.05255200  | 2.75733800  | -0.46404900 |
| H | 2.02118400  | 3.05879100  | -0.83378400 |
| C | 0.04912000  | 3.57701400  | -0.12510500 |
| H | 0.06047100  | 4.65669400  | -0.15625800 |
| C | -1.12991100 | 2.76150900  | 0.31069000  |
| H | -2.00533900 | 2.94740400  | -0.32156000 |
| H | -1.42941100 | 2.98354500  | 1.34145700  |
| C | -4.08285300 | 1.19258900  | 0.53372800  |
| H | -4.03660600 | 2.22789700  | 0.83848300  |
| C | 4.12092900  | 1.22617900  | -0.44913400 |
| H | 4.09646200  | 2.27976900  | -0.68315900 |
| C | 5.28137900  | 0.52863600  | -0.20601400 |
| C | 4.97571500  | -0.89626900 | 0.07241800  |
| C | -4.96233900 | -0.89987900 | -0.06427600 |
| C | -5.25507300 | 0.50821700  | 0.30676800  |
| C | 5.81302700  | -1.92431400 | 0.34788300  |
| H | 5.34520500  | -2.88950600 | 0.51183000  |
| C | 6.59456400  | 1.11018800  | -0.22648600 |
| H | 6.61188700  | 2.17311900  | -0.44601300 |

|   |             |             |             |
|---|-------------|-------------|-------------|
| C | -5.81279300 | -1.91176400 | -0.35901500 |
| H | -5.35403400 | -2.86601300 | -0.59652900 |
| C | -6.56555200 | 1.08301400  | 0.42593300  |
| H | -6.57215900 | 2.13065600  | 0.71054800  |
| C | 7.24748600  | -1.90706600 | 0.45366900  |
| H | 7.70025200  | -2.86383300 | 0.68695300  |
| C | 8.09488800  | -0.85861000 | 0.30075500  |
| H | 9.14990500  | -1.07416800 | 0.42644500  |
| C | 7.79432600  | 0.51695100  | -0.00873200 |
| H | 8.66136200  | 1.16427500  | -0.07503900 |
| C | -7.25068000 | -1.89017900 | -0.40117500 |
| H | -7.71442400 | -2.83192600 | -0.67098400 |
| C | -8.08906900 | -0.85393800 | -0.14860900 |
| H | -9.14881600 | -1.06362300 | -0.24063200 |
| C | -7.77477600 | 0.50130400  | 0.22971300  |
| H | -8.63771500 | 1.14078700  | 0.37649600  |

### Allene 17 M052X/6-31G\*

0 1

|   |             |             |             |
|---|-------------|-------------|-------------|
| C | 1.58289900  | -0.71734900 | 0.35366800  |
| C | 1.27003500  | 0.67794400  | -0.08036600 |
| C | -0.00785100 | 1.01665000  | -0.08952100 |
| C | 0.65414500  | -1.79068300 | 0.15937600  |
| C | -1.28244100 | 0.66184300  | -0.07364200 |
| C | -0.65644900 | -1.80492200 | -0.31448500 |
| C | -1.60921000 | -0.73463900 | -0.47562700 |
| C | 2.50921300  | 1.38261100  | -0.38143600 |
| H | 2.55968800  | 2.41500900  | -0.68567100 |
| C | 3.51264300  | 0.53182300  | -0.01123200 |
| C | 2.96676000  | -0.76278900 | 0.39947400  |
| C | -2.99376000 | -0.78418100 | -0.46033500 |
| C | -2.51021900 | 1.37775800  | 0.25247800  |
| H | -2.54681900 | 2.41588500  | 0.53923700  |
| C | -3.52614900 | 0.52348100  | -0.06313700 |
| C | -1.04371500 | -3.21070100 | -0.51587700 |
| H | -2.00721000 | -3.50926600 | -0.90109300 |
| C | -0.04565100 | -4.03324200 | -0.16763200 |
| H | -0.05689500 | -5.11273800 | -0.20669300 |
| C | 1.12603400  | -3.22093000 | 0.29350800  |
| H | 2.01300100  | -3.40136400 | -0.32421400 |
| H | 1.40802000  | -3.45053900 | 1.32762700  |
| C | 4.06829000  | -1.65403000 | 0.59449700  |
| H | 4.01348500  | -2.68880500 | 0.89921300  |
| C | -4.10718200 | -1.67653700 | -0.57567200 |
| H | -4.07629700 | -2.72389600 | -0.83525700 |
| C | -5.27702900 | -0.98260300 | -0.35140800 |
| C | -4.98062900 | 0.43203300  | -0.02876200 |
| C | 4.96736800  | 0.43568200  | 0.01603500  |
| C | 5.24898500  | -0.96912100 | 0.39704500  |
| C | -5.83629900 | 1.44362600  | 0.25724900  |
| C | -6.58246800 | -1.57123100 | -0.42684100 |

|   |              |             |             |
|---|--------------|-------------|-------------|
| H | -6.58619600  | -2.63061200 | -0.67067100 |
| C | 5.83599300   | 1.43728900  | -0.26654400 |
| C | 6.54939500   | -1.55323100 | 0.54914100  |
| H | 6.54184700   | -2.60347000 | 0.83008600  |
| C | -7.28963400  | 1.43646500  | 0.30889100  |
| C | -8.13481000  | 0.38307200  | 0.09454200  |
| C | -7.79220100  | -0.99313200 | -0.23692300 |
| C | 7.29031300   | 1.42818200  | -0.25857400 |
| C | 8.12406200   | 0.38255300  | 0.02630500  |
| C | 7.76694500   | -0.98177600 | 0.39060800  |
| C | -9.59718100  | 0.44956800  | 0.16695200  |
| H | -10.14670100 | 1.35140200  | 0.39418400  |
| C | -10.14439200 | -0.74743900 | -0.08306100 |
| H | -11.20337500 | -0.96449600 | -0.08981500 |
| C | 7.72228000   | 2.78231100  | -0.61880800 |
| H | 8.75691800   | 3.08457100  | -0.69080400 |
| C | 6.66717600   | 3.57661200  | -0.84215300 |
| H | 6.71321700   | 4.61937900  | -1.12325600 |
| C | 9.58823600   | 0.44734700  | 0.01281400  |
| H | 10.14763400  | 1.34099700  | -0.22261000 |
| C | 10.12351100  | -0.73976300 | 0.32784000  |
| H | 11.18111200  | -0.95556400 | 0.38713600  |
| C | -9.08813500  | -1.77888700 | -0.35922700 |
| H | -9.19814100  | -2.22043300 | -1.35515400 |
| H | -9.12664100  | -2.60463300 | 0.35910700  |
| C | 9.05592200   | -1.76180400 | 0.59504700  |
| H | 9.12462100   | -2.61204900 | -0.09183800 |
| H | 9.12413300   | -2.16843700 | 1.60951300  |
| C | 5.37726700   | 2.82684700  | -0.65783300 |
| H | 4.73937300   | 3.26889200  | 0.11634500  |
| H | 4.78168200   | 2.80095800  | -1.57770600 |
| C | -5.36178500  | 2.84417700  | 0.58540400  |
| H | -4.73252900  | 2.84714200  | 1.48286200  |
| H | -4.75330400  | 3.26006300  | -0.22598100 |
| C | -7.70655200  | 2.80244700  | 0.64115000  |
| H | -8.73737000  | 3.10833500  | 0.74462700  |
| C | -6.64306300  | 3.60201900  | 0.79502900  |
| H | -6.67726500  | 4.65357000  | 1.04308900  |

### Allene 18 M052X/6-31G\*

|     |             |             |             |
|-----|-------------|-------------|-------------|
| 0 1 |             |             |             |
| C   | -1.56951500 | -0.85471200 | -0.40631300 |
| C   | -1.26632700 | 0.52684500  | 0.08824900  |
| C   | 0.01034600  | 0.87026900  | 0.12403000  |
| C   | -0.64306200 | -1.92756000 | -0.23701200 |
| C   | 1.28286200  | 0.50052200  | 0.11430800  |
| C   | 0.65823400  | -1.96899700 | 0.26810500  |
| C   | 1.60349700  | -0.90305600 | 0.47621400  |
| C   | -2.51423100 | 1.21073000  | 0.39978900  |
| H   | -2.57410100 | 2.23028200  | 0.74287300  |
| C   | -3.50856000 | 0.37206600  | -0.02612700 |

|   |              |             |             |
|---|--------------|-------------|-------------|
| C | -2.95320000  | -0.89942100 | -0.48998000 |
| C | 2.99106500   | -0.95799800 | 0.47500000  |
| C | 2.51811300   | 1.22433600  | -0.17324000 |
| H | 2.55697100   | 2.27192700  | -0.42465200 |
| C | 3.53164900   | 0.36197300  | 0.12689700  |
| C | 1.03640300   | -3.36820900 | 0.47348100  |
| H | 1.98342400   | -3.67029900 | 0.88960900  |
| C | 0.03099700   | -4.18615200 | 0.08007900  |
| C | -1.13008400  | -3.35035500 | -0.39205400 |
| H | -2.02703800  | -3.51465800 | 0.21549100  |
| H | -1.39282600  | -3.58326600 | -1.42976100 |
| C | -4.04951000  | -1.77895800 | -0.75840300 |
| H | -3.98649600  | -2.79530600 | -1.11983300 |
| C | 4.09675800   | -1.85610600 | 0.56780800  |
| H | 4.05933000   | -2.91221800 | 0.78785100  |
| C | 5.27460800   | -1.15670200 | 0.37656300  |
| C | 4.98664500   | 0.26449800  | 0.10194000  |
| C | -4.96292100  | 0.27332000  | -0.08828100 |
| C | -5.23636300  | -1.10583800 | -0.55112700 |
| C | 5.85157500   | 1.27977800  | -0.14633100 |
| C | 6.57792000   | -1.74354400 | 0.44266100  |
| H | 6.58536600   | -2.80961600 | 0.65586900  |
| C | -5.83990500  | 1.25610400  | 0.23352600  |
| C | -6.53630200  | -1.66963200 | -0.76380800 |
| H | -6.53174000  | -2.70241600 | -1.10457600 |
| C | 7.30054200   | 1.28884600  | -0.20092500 |
| C | 8.14784200   | 0.22278800  | -0.01644900 |
| C | 7.78691300   | -1.15361600 | 0.27407300  |
| C | -7.29178400  | 1.26970900  | 0.20080900  |
| C | -8.12551700  | 0.24295400  | -0.16383700 |
| C | -7.75142900  | -1.09515700 | -0.59990900 |
| C | 9.60023100   | 0.29071900  | -0.07931800 |
| H | 10.14679000  | 1.20033300  | -0.27058600 |
| C | 10.15095900  | -0.93231900 | 0.12949100  |
| C | -7.72148300  | 2.59744200  | 0.61999100  |
| H | -8.75455400  | 2.90200400  | 0.67603500  |
| C | -6.65253200  | 3.37584600  | 0.92362000  |
| C | -9.57914400  | 0.31199900  | -0.17146800 |
| H | -10.13595100 | 1.18876500  | 0.11908500  |
| C | -10.11815500 | -0.86148400 | -0.58931500 |
| C | 9.07274200   | -1.95394100 | 0.39212600  |
| H | 9.16509700   | -2.39840500 | 1.38822900  |
| H | 9.11221400   | -2.77115100 | -0.33528000 |
| C | -9.03089700  | -1.86688500 | -0.87633200 |
| H | -9.10779000  | -2.74547900 | -0.22725900 |
| H | -9.07999500  | -2.22104600 | -1.91126000 |
| C | -5.36854400  | 2.61488000  | 0.70193300  |
| H | -4.72357400  | 3.08091100  | -0.05178000 |
| H | -4.78047600  | 2.53854700  | 1.62373300  |
| C | 5.36337600   | 2.68123700  | -0.43871200 |
| H | 4.74429700   | 2.69020100  | -1.34277000 |
| H | 4.74678000   | 3.07286900  | 0.37812600  |

|   |              |             |             |
|---|--------------|-------------|-------------|
| C | 7.71684400   | 2.65178600  | -0.49884900 |
| H | 8.74640700   | 2.95317200  | -0.60731000 |
| C | 6.63821900   | 3.46810200  | -0.61722100 |
| N | 0.01698100   | -5.56435300 | 0.01993200  |
| C | 1.14199700   | -6.22630900 | 0.64456000  |
| H | 2.06716100   | -5.86145200 | 0.19700900  |
| H | 1.18406300   | -6.04440300 | 1.72764800  |
| H | 1.07104200   | -7.29912300 | 0.46628200  |
| C | -1.26197200  | -6.22713600 | 0.19867600  |
| H | -1.63599300  | -6.15726100 | 1.22947700  |
| H | -2.00239400  | -5.79015100 | -0.46958300 |
| H | -1.15304400  | -7.28038500 | -0.06141600 |
| N | -11.44269300 | -1.15414600 | -0.80667800 |
| N | -6.65052500  | 4.65309600  | 1.43142200  |
| N | 6.62182600   | 4.82588600  | -0.81349300 |
| N | 11.47596400  | -1.28542400 | 0.06447900  |
| C | 7.89716100   | 5.44904200  | -1.09749800 |
| H | 7.76632100   | 6.52989800  | -1.13447700 |
| H | 8.60060200   | 5.21349700  | -0.29817600 |
| H | 8.32299800   | 5.10715800  | -2.05027900 |
| C | 5.47482900   | 5.41900200  | -1.47789200 |
| H | 4.55333400   | 5.03005500  | -1.04906300 |
| H | 5.49218800   | 6.49678500  | -1.31612900 |
| H | 5.46793800   | 5.22763800  | -2.55895600 |
| C | -12.39854200 | -0.15527900 | -0.37693300 |
| H | -12.16265400 | 0.79841100  | -0.84999100 |
| H | -13.39686200 | -0.45800100 | -0.69073000 |
| H | -12.39249400 | -0.01599600 | 0.71253400  |
| C | -11.87874000 | -2.53180000 | -0.66475300 |
| H | -12.86984600 | -2.63499600 | -1.10654400 |
| H | -11.20197100 | -3.19455400 | -1.20076900 |
| H | -11.92903700 | -2.85351300 | 0.38404200  |
| C | -5.51620900  | 5.51059600  | 1.13710200  |
| H | -5.54968400  | 6.37744100  | 1.79711600  |
| H | -4.58648400  | 4.97842400  | 1.32969000  |
| H | -5.51062400  | 5.86314100  | 0.09708400  |
| C | -7.93372100  | 5.32041700  | 1.48516700  |
| H | -8.63334600  | 4.71253000  | 2.05991300  |
| H | -7.81712800  | 6.27997700  | 1.98771900  |
| H | -8.35709000  | 5.48901000  | 0.48569500  |
| C | 12.42341100  | -0.19944900 | -0.07496800 |
| H | 12.16850700  | 0.39173500  | -0.95494400 |
| H | 12.42875800  | 0.46223300  | 0.80146800  |
| H | 13.42169100  | -0.61250700 | -0.21418100 |
| C | 11.93408300  | -2.41406200 | 0.85505300  |
| H | 12.00557700  | -2.17870700 | 1.92519500  |
| H | 11.25907700  | -3.25826900 | 0.72767800  |
| H | 12.91935600  | -2.71596000 | 0.50004000  |

Allene 19 M052X/6-31G\*

0 1

|   |              |             |             |
|---|--------------|-------------|-------------|
| C | -1.58590600  | 0.83952300  | 0.69708300  |
| C | -1.22483200  | -0.52324900 | 0.26168500  |
| C | 0.04268500   | -0.93370500 | 0.32017300  |
| C | -0.75433500  | 1.90317900  | 0.52250600  |
| C | 1.27330500   | -0.41891500 | 0.37523700  |
| C | 0.63007000   | 1.95202200  | 0.03392800  |
| C | 1.54299400   | 0.94147300  | -0.12097200 |
| C | -2.46463900  | -1.21750000 | -0.11357900 |
| H | -2.47729100  | -2.20881600 | -0.54190000 |
| C | -3.51867700  | -0.45184500 | 0.26932000  |
| C | -3.03572800  | 0.82913600  | 0.82161000  |
| C | 2.99093500   | 1.01491700  | -0.26268200 |
| C | 2.55483700   | -1.01863900 | 0.77417100  |
| H | 2.62996500   | -1.99002900 | 1.23973600  |
| C | 3.55550900   | -0.20860900 | 0.34567100  |
| C | 0.94491400   | 3.37101800  | -0.16778500 |
| H | 1.89965200   | 3.71224600  | -0.53928900 |
| C | -0.08349800  | 4.15051200  | 0.18748900  |
| H | -0.09937500  | 5.23047900  | 0.14290500  |
| C | -1.23975200  | 3.32879900  | 0.68212800  |
| H | -2.15868400  | 3.49990000  | 0.10922400  |
| H | -1.47540000  | 3.55204900  | 1.72860100  |
| C | -4.11465700  | 1.58367200  | 1.13797100  |
| H | -4.13504000  | 2.57362200  | 1.57173300  |
| C | 4.02474600   | 1.80352500  | -0.64190600 |
| H | 3.99167200   | 2.76659900  | -1.13124000 |
| C | 5.28209500   | 1.11586500  | -0.31107800 |
| C | 5.00576900   | -0.10957800 | 0.28581900  |
| C | -4.97351600  | -0.42288100 | 0.28887500  |
| C | -5.32683000  | 0.81269400  | 0.82118400  |
| C | 5.94514400   | -1.03884100 | 0.84009800  |
| C | 6.55785100   | 1.70540100  | -0.60035100 |
| H | 6.52305300   | 2.70727400  | -1.01770300 |
| C | -5.84945200  | -1.49743200 | -0.07442300 |
| C | -6.63821000  | 1.33733300  | 1.07614500  |
| H | -6.66405900  | 2.30432700  | 1.56954000  |
| C | 7.31368500   | -1.06720300 | 0.73353200  |
| C | 8.17794200   | -0.19209500 | -0.05368900 |
| C | 7.78470000   | 1.13964500  | -0.48602700 |
| C | -7.21786200  | -1.51074000 | -0.18564800 |
| C | -8.14973300  | -0.39627700 | -0.03480100 |
| C | -7.83339600  | 0.81299700  | 0.70949800  |
| C | 9.48585500   | -0.44133600 | -0.42788400 |
| C | 10.10134500  | 0.76805900  | -0.96050000 |
| C | -7.64103100  | -2.90293300 | -0.41581100 |
| H | -8.67266600  | -3.21766000 | -0.46919000 |
| C | -6.57018700  | -3.70698600 | -0.50151200 |
| H | -6.57761800  | -4.77469400 | -0.66356500 |
| C | -9.45829900  | -0.34643800 | -0.47948800 |
| C | -10.14763300 | 0.80134800  | 0.09799000  |
| C | 9.03852400   | 1.84527500  | -0.95045000 |
| H | 8.90762900   | 2.30380300  | -1.93276600 |

|   |              |             |             |
|---|--------------|-------------|-------------|
| H | 9.31374900   | 2.64100800  | -0.25087000 |
| C | -9.13505900  | 1.54619600  | 0.94060000  |
| H | -9.06480800  | 2.60043500  | 0.66490400  |
| H | -9.41805200  | 1.50135400  | 1.99715600  |
| C | -5.32764800  | -2.89206800 | -0.31730000 |
| H | -4.72029100  | -3.24427400 | 0.52340000  |
| H | -4.68789500  | -2.92221300 | -1.20737200 |
| C | 5.50551500   | -2.14952800 | 1.76182500  |
| H | 4.90489400   | -1.76509500 | 2.59319900  |
| H | 4.88196000   | -2.87679100 | 1.22784200  |
| C | 7.81692800   | -2.12013600 | 1.63232800  |
| H | 8.86525300   | -2.31339600 | 1.80464300  |
| C | 6.79428500   | -2.75594600 | 2.22421400  |
| H | 6.86386800   | -3.56692800 | 2.93399000  |
| C | 10.11989200  | -1.74871600 | -0.43923400 |
| H | 9.45046700   | -2.58045300 | -0.25621500 |
| C | -10.03372200 | -1.21488500 | -1.49241400 |
| H | -9.32154400  | -1.84942200 | -2.00566700 |
| C | -11.30997000 | -1.28916200 | -1.92625000 |
| H | -11.49531100 | -2.00301900 | -2.72160100 |
| C | -12.48172000 | -0.54450200 | -1.50074300 |
| H | -13.41910900 | -0.87611200 | -1.93233300 |
| C | 11.40179300  | -2.07171500 | -0.71245300 |
| H | 11.63531600  | -3.13068100 | -0.68698500 |
| C | 12.52450600  | -1.21575800 | -1.05172600 |
| H | 13.48357400  | -1.71721900 | -1.11178400 |
| C | 11.37224900  | 1.00697000  | -1.35004900 |
| H | 11.59107000  | 2.01674900  | -1.68244900 |
| C | 12.50368900  | 0.10240200  | -1.33922000 |
| H | 13.45191700  | 0.55763000  | -1.60385800 |
| C | -11.44186800 | 1.17845200  | 0.01817500  |
| H | -11.71815700 | 2.06779800  | 0.57556800  |
| C | -12.53048800 | 0.52353100  | -0.67768500 |
| H | -13.50743300 | 0.96358200  | -0.50922600 |

PROTONATED

Allene 1H M052X/6-31G\*

|     |             |             |            |
|-----|-------------|-------------|------------|
| 1 1 |             |             |            |
| C   | -1.44769700 | -0.69717400 | 0.00000000 |
| C   | -1.44769700 | 0.69717400  | 0.00000000 |
| C   | -0.35756400 | 1.56666700  | 0.00000000 |
| C   | -0.35756400 | -1.56666700 | 0.00000000 |
| C   | 1.00186200  | 1.25633000  | 0.00000000 |
| C   | 1.00186200  | -1.25633000 | 0.00000000 |
| C   | 1.60681000  | 0.00000000  | 0.00000000 |
| H   | -2.42404900 | -1.16733200 | 0.00000000 |
| H   | -2.42404900 | 1.16733200  | 0.00000000 |
| H   | -0.59873000 | 2.62307200  | 0.00000000 |

|   |             |             |            |
|---|-------------|-------------|------------|
| H | -0.59873000 | -2.62307200 | 0.00000000 |
| H | 1.67751800  | 2.10342900  | 0.00000000 |
| H | 1.67751900  | -2.10342900 | 0.00000000 |
| H | 2.69046100  | 0.00000000  | 0.00000000 |

**Allene 2H M052X/6-31G\***

|   |             |             |             |
|---|-------------|-------------|-------------|
| 1 | 1           |             |             |
| C | 0.50095200  | -0.69260600 | 0.00000100  |
| C | 0.49479700  | 0.73006800  | 0.00000700  |
| C | -0.61294200 | 1.58908200  | 0.00006300  |
| C | -0.56561700 | -1.56937400 | 0.00003000  |
| C | -1.95508200 | 1.24867900  | 0.00002300  |
| C | -1.93483500 | -1.26714300 | -0.00001800 |
| C | -2.54658600 | -0.02344100 | -0.00004400 |
| H | -0.38766800 | 2.64948000  | 0.00011400  |
| H | -0.31535300 | -2.62494600 | 0.00008300  |
| H | -2.64796800 | 2.08165500  | 0.00004100  |
| H | -2.60096200 | -2.12136700 | -0.00003700 |
| H | -3.62984000 | -0.03211400 | -0.00010100 |
| C | 1.87004600  | 1.19292800  | -0.00003200 |
| H | 2.15311500  | 2.23543800  | -0.00003500 |
| C | 2.70255600  | 0.13306700  | -0.00006400 |
| H | 3.78215900  | 0.17740400  | -0.00010400 |
| C | 1.93495900  | -1.14733700 | 0.00002400  |
| H | 2.15852300  | -1.76450800 | 0.87804300  |
| H | 2.15849900  | -1.76458100 | -0.87794800 |

**Allene 3H M052X/6-31G\***

|   |             |             |             |
|---|-------------|-------------|-------------|
| 1 | 1           |             |             |
| C | 0.66340500  | -0.14191100 | -0.00003200 |
| C | 1.39472500  | 1.07948700  | -0.00002200 |
| C | 2.78341900  | 1.26395900  | 0.00002000  |
| C | 1.15379300  | -1.43341100 | -0.00001000 |
| C | 2.48841200  | -1.86186100 | 0.00000700  |
| C | 3.64599500  | -1.09909400 | 0.00002200  |
| H | 3.12084900  | 2.29436600  | 0.00003600  |
| H | 0.41184000  | -2.22466600 | -0.00001200 |
| H | 2.63261000  | -2.93565800 | 0.00000900  |
| H | 4.57645400  | -1.65378700 | 0.00003000  |
| C | 0.44338500  | 2.17269100  | -0.00006400 |
| H | 0.72590800  | 3.21562800  | -0.00006900 |
| C | -0.80760100 | 1.67365800  | -0.00009900 |
| H | -1.71038900 | 2.26769200  | -0.00014500 |
| C | -0.81598000 | 0.17280400  | -0.00005600 |
| C | -1.51396800 | -0.39312600 | 1.26961400  |
| H | -1.04020100 | 0.02371000  | 2.16090300  |
| H | -1.35918200 | -1.47631700 | 1.28914500  |
| C | -1.51403900 | -0.39325900 | -1.26960600 |
| H | -1.04033200 | 0.02347600  | -2.16097500 |
| H | -1.35926000 | -1.47645400 | -1.28903600 |



|   |             |             |             |
|---|-------------|-------------|-------------|
| C | -3.01803500 | -0.11085600 | 1.26051600  |
| H | -3.46104600 | -0.55652800 | 2.15274900  |
| H | -3.19899800 | 0.96620200  | 1.32854500  |
| C | -3.01810700 | -0.11098800 | -1.26045000 |
| H | -3.46117000 | -0.55674800 | -2.15261200 |
| H | -3.19907000 | 0.96606400  | -1.32857800 |
| C | -3.67739700 | -0.67142100 | 0.00008000  |
| H | -3.58461800 | -1.76300200 | 0.00013500  |
| H | -4.74402100 | -0.44323500 | 0.00009900  |
| C | 3.77504300  | 0.29659100  | 0.00003400  |
| H | 4.79232100  | 0.66967100  | 0.00005500  |

**Allene 4H M052X/6-31G\***

1 1

|   |             |             |             |
|---|-------------|-------------|-------------|
| C | -0.50096500 | -0.69261900 | 0.00000000  |
| C | -0.49479100 | 0.73005600  | -0.00000100 |
| C | 0.61294800  | 1.58907500  | -0.00000100 |
| C | 0.56561700  | -1.56937200 | 0.00000000  |
| C | 1.95508400  | 1.24868200  | -0.00000100 |
| C | 1.93483300  | -1.26714300 | -0.00000100 |
| C | 2.54658300  | -0.02344500 | -0.00000100 |
| H | 2.64797800  | 2.08165000  | -0.00000200 |
| H | 3.62983700  | -0.03211600 | -0.00000200 |
| C | -1.87003100 | 1.19293300  | 0.00000200  |
| H | -2.15310000 | 2.23544300  | 0.00000500  |
| C | -2.70255200 | 0.13308100  | -0.00000400 |
| H | -3.78215500 | 0.17741300  | -0.00000400 |
| C | -1.93496800 | -1.14732600 | 0.00000400  |
| H | -2.15853600 | -1.76454500 | -0.87798000 |
| H | -2.15853500 | -1.76453600 | 0.87799600  |
| H | 0.38765300  | 2.64946900  | 0.00000000  |
| H | 0.31535300  | -2.62494500 | 0.00000100  |
| H | 2.60096000  | -2.12136700 | -0.00000100 |

**Allene 5H M052X/6-31G\***

1 1

|   |             |             |             |
|---|-------------|-------------|-------------|
| C | -0.66345500 | -0.14200800 | -0.00004400 |
| C | -1.39462000 | 1.07942700  | -0.00003000 |
| C | -2.78325600 | 1.26405000  | 0.00002900  |
| C | -1.15389700 | -1.43345800 | -0.00002100 |
| C | -3.77494600 | 0.29678000  | 0.00005200  |
| C | -2.48851200 | -1.86175900 | 0.00000000  |
| C | -3.64599900 | -1.09886700 | 0.00003000  |
| H | -0.41197100 | -2.22472500 | -0.00002700 |
| H | -4.79218000 | 0.66993200  | 0.00008800  |
| H | -2.63287600 | -2.93551800 | -0.00000400 |
| H | -4.57647900 | -1.65349500 | 0.00004400  |
| C | -0.44321000 | 2.17255100  | -0.00008800 |
| H | -0.72574000 | 3.21547300  | -0.00009500 |
| C | 0.80769100  | 1.67342700  | -0.00012700 |

|   |             |             |             |
|---|-------------|-------------|-------------|
| H | 1.71054900  | 2.26731600  | -0.00018500 |
| C | 0.81598700  | 0.17255500  | -0.00007000 |
| C | 1.51399600  | -0.39337600 | -1.26962100 |
| H | 1.04026700  | 0.02336200  | -2.16099300 |
| H | 1.35939900  | -1.47657300 | -1.28919600 |
| C | 1.51390200  | -0.39321000 | 1.26963100  |
| H | 1.04009700  | 0.02365200  | 2.16090400  |
| H | 1.35929400  | -1.47640300 | 1.28933200  |
| C | 3.01799200  | -0.11098400 | -1.26044200 |
| H | 3.19874800  | 0.96607200  | -1.32864000 |
| H | 3.46109800  | -0.55676700 | -2.15257200 |
| C | 3.67739600  | -0.67117300 | 0.00010500  |
| C | 3.01789700  | -0.11082400 | 1.26053200  |
| H | 3.19865300  | 0.96623900  | 1.32861000  |
| H | 3.46093500  | -0.55650000 | 2.15275000  |
| H | 4.74392700  | -0.44256600 | 0.00013100  |
| H | 3.58507400  | -1.76276800 | 0.00017100  |
| H | -3.12058700 | 2.29447600  | 0.00004900  |

**Allene 6H M052X/6-31G\***

|   |             |             |             |
|---|-------------|-------------|-------------|
| 1 | 1           |             |             |
| C | 0.67551500  | -0.56832000 | -0.00001500 |
| C | 1.56277600  | 0.55035000  | 0.00004500  |
| C | 1.27346400  | 1.89600100  | 0.00007100  |
| C | -0.71420100 | -0.54435000 | -0.00001700 |
| C | 0.01270500  | 2.52035100  | 0.00003400  |
| C | -1.57335900 | 0.57771400  | -0.00001000 |
| C | -1.24140200 | 1.94494400  | -0.00000500 |
| H | 2.12691700  | 2.56535900  | 0.00011300  |
| H | -2.08192200 | 2.62932400  | -0.00002300 |
| C | 2.97443600  | 0.02144300  | 0.00008400  |
| H | 3.53111400  | 0.36689500  | 0.87835100  |
| C | 2.78648300  | -1.46074700 | -0.00003200 |
| H | 3.60784700  | -2.16274700 | -0.00006200 |
| C | 1.48032500  | -1.78253800 | -0.00010300 |
| H | 1.07186100  | -2.78184100 | -0.00018100 |
| C | -1.56646100 | -1.78498800 | -0.00004000 |
| H | -1.36903200 | -2.40916200 | -0.87929500 |
| H | -1.36900800 | -2.40934000 | 0.87907400  |
| C | -2.94883500 | 0.10007400  | 0.00002900  |
| H | -3.80907100 | 0.75338700  | 0.00007400  |
| C | -2.96033800 | -1.24493200 | -0.00005400 |
| H | -3.83962900 | -1.87248500 | -0.00005100 |
| H | 0.03298100  | 3.60348800  | 0.00004500  |
| H | 3.53129600  | 0.36710400  | -0.87797700 |

**Allene 7H M052X/6-31G\***

|   |             |            |             |
|---|-------------|------------|-------------|
| 1 | 1           |            |             |
| C | -1.19547300 | 0.76961800 | -0.00002500 |
| C | -1.46906800 | 2.16197300 | -0.00015800 |

|   |             |             |             |
|---|-------------|-------------|-------------|
| C | -0.59347500 | 3.26079600  | -0.00026300 |
| C | 0.06306800  | 0.16434900  | 0.00002700  |
| C | 0.78439900  | 3.25712300  | -0.00029000 |
| C | 1.34277800  | 0.81078300  | -0.00006700 |
| C | 1.65052700  | 2.15309900  | -0.00021300 |
| H | -1.07169500 | 4.23374200  | -0.00033900 |
| H | 2.70724800  | 2.39591400  | -0.00027200 |
| C | -2.90927600 | 2.34879900  | -0.00017000 |
| H | -3.38537800 | 3.31880400  | -0.00026100 |
| C | -3.51443100 | 1.15105700  | -0.00005300 |
| H | -4.58286500 | 0.99181400  | -0.00003500 |
| C | -2.52320700 | 0.02259800  | 0.00005300  |
| C | -2.71494100 | -0.82992300 | 1.28790300  |
| H | -2.67821400 | -0.16638500 | 2.15500200  |
| H | -1.88602900 | -1.53169500 | 1.38982600  |
| C | -2.71495100 | -0.83019500 | -1.28761200 |
| H | -2.67823200 | -0.16684300 | -2.15485300 |
| H | -1.88603800 | -1.53198700 | -1.38939300 |
| C | -4.02600800 | -1.61967500 | 1.25911600  |
| H | -4.07710700 | -2.24223200 | 2.15420700  |
| H | -4.88081200 | -0.93846000 | 1.30547400  |
| C | -4.02601400 | -1.61994700 | -1.25865100 |
| H | -4.07711500 | -2.24269800 | -2.15360700 |
| H | -4.88082100 | -0.93874400 | -1.30515300 |
| C | -4.12409600 | -2.48178000 | 0.00032600  |
| H | -3.31134900 | -3.21762900 | 0.00040500  |
| H | -5.05953000 | -3.04308100 | 0.00038900  |
| C | 2.43783300  | -0.23878000 | -0.00000300 |
| C | 0.31820500  | -1.27481400 | 0.00017800  |
| H | -0.44203700 | -2.03663100 | 0.00027500  |
| C | 1.64104100  | -1.50677100 | 0.00016800  |
| H | 2.09171300  | -2.48888500 | 0.00026500  |
| C | 3.32738200  | -0.13002100 | 1.26822900  |
| H | 2.70292700  | -0.23231500 | 2.15865000  |
| C | 3.32720700  | -0.13029400 | -1.26839200 |
| H | 2.70262200  | -0.23278400 | -2.15870000 |
| C | 4.45315100  | -1.16685800 | -1.26148900 |
| H | 4.03524600  | -2.17592300 | -1.33024500 |
| H | 5.06691200  | -1.02417400 | -2.15279500 |
| C | 4.45332100  | -1.16659100 | 1.26139100  |
| H | 5.06720400  | -1.02372300 | 2.15258400  |
| H | 4.03542400  | -2.17564000 | 1.33041300  |
| C | 5.30878400  | -1.04275700 | -0.00012000 |
| H | 5.80864000  | -0.06790400 | -0.00025600 |
| H | 6.09262600  | -1.80163900 | -0.00009300 |
| H | 3.77166800  | 0.86976300  | 1.29234100  |
| H | 3.77148000  | 0.86948900  | -1.29277900 |
| H | 1.26298600  | 4.22911200  | -0.00038600 |

Allene 8H M052X/6-31G\*

|   |             |             |             |
|---|-------------|-------------|-------------|
| C | -0.71421800 | -0.54472300 | -0.00001300 |
| C | -1.57318100 | 0.57746100  | -0.00001500 |
| C | -1.24140200 | 1.94469700  | -0.00002800 |
| C | 0.67564800  | -0.56859000 | -0.00000900 |
| C | 0.01253800  | 2.52009800  | -0.00003700 |
| C | 1.56254600  | 0.55025300  | -0.00000300 |
| C | 1.27310700  | 1.89593700  | -0.00002100 |
| H | 0.03271600  | 3.60366400  | -0.00005900 |
| H | 2.12701200  | 2.56536300  | -0.00002600 |
| C | -2.94862100 | 0.09999500  | 0.00001500  |
| H | -3.80933400 | 0.75286800  | 0.00003600  |
| C | -2.95993700 | -1.24499700 | -0.00001400 |
| H | -3.83952500 | -1.87256000 | -0.00000900 |
| C | -1.56641000 | -1.78467000 | 0.00002200  |
| H | -1.36861900 | -2.40847600 | -0.87928100 |
| H | -1.36863200 | -2.40842100 | 0.87936900  |
| C | 2.97374500  | 0.02174700  | 0.00003700  |
| H | 3.52994700  | 0.36759300  | -0.87822400 |
| H | 3.52991100  | 0.36758800  | 0.87832400  |
| C | 1.48069900  | -1.78256800 | 0.00003000  |
| H | 1.07338400  | -2.78241200 | 0.00004500  |
| C | 2.78666300  | -1.46003900 | 0.00001000  |
| H | 3.60842700  | -2.16194400 | 0.00002700  |
| H | -2.08235400 | 2.62914200  | -0.00003700 |

**Allene 9H M052X/6-31G\***

1 1

|   |             |             |             |
|---|-------------|-------------|-------------|
| C | -1.19547400 | 0.76962000  | -0.00002200 |
| C | -1.46906900 | 2.16197400  | -0.00010300 |
| C | 0.06306700  | 0.16435000  | 0.00001400  |
| C | 0.78439700  | 3.25712200  | -0.00016700 |
| C | 1.34277500  | 0.81078200  | -0.00003300 |
| C | 1.65052400  | 2.15309900  | -0.00011300 |
| H | 1.26298400  | 4.22911200  | -0.00022100 |
| H | 2.70724600  | 2.39591200  | -0.00013700 |
| C | -2.90927900 | 2.34879900  | -0.00012000 |
| H | -3.38538000 | 3.31880400  | -0.00017800 |
| C | -3.51443300 | 1.15105700  | -0.00005300 |
| H | -4.58286700 | 0.99181300  | -0.00004900 |
| C | -2.52320600 | 0.02259800  | 0.00001900  |
| C | 0.31820200  | -1.27481400 | 0.00009900  |
| H | -0.44204300 | -2.03662800 | 0.00015100  |
| C | 1.64103600  | -1.50677200 | 0.00010200  |
| H | 2.09170900  | -2.48888700 | 0.00015900  |
| C | 4.45327300  | -1.16664800 | 1.26143500  |
| H | 5.06712400  | -1.02381800 | 2.15265600  |
| H | 4.03537700  | -2.17570300 | 1.33039600  |
| C | 5.30877900  | -1.04275200 | -0.00004000 |
| H | 6.09262300  | -1.80163200 | -0.00002100 |
| H | 5.80863300  | -0.06789700 | -0.00011300 |
| C | 4.45319000  | -1.16679600 | -1.26144500 |

|   |             |             |             |
|---|-------------|-------------|-------------|
| H | 5.06698200  | -1.02406800 | -2.15272300 |
| H | 4.03529100  | -2.17585900 | -1.33026200 |
| C | 3.32732900  | -0.13008300 | 1.26828300  |
| H | 2.70283800  | -0.23242700 | 2.15867400  |
| H | 3.77161000  | 0.86970200  | 1.29246500  |
| C | 3.32724500  | -0.13023400 | -1.26833900 |
| H | 3.77152000  | 0.86955100  | -1.29266800 |
| H | 2.70269100  | -0.23268400 | -2.15867300 |
| C | 2.43783000  | -0.23878100 | 0.00001100  |
| C | -4.02599400 | -1.61990200 | -1.25876400 |
| H | -4.88080800 | -0.93870700 | -1.30523700 |
| H | -4.07708500 | -2.24261500 | -2.15374700 |
| C | -4.02600600 | -1.61973500 | 1.25900300  |
| H | -4.07710900 | -2.24233000 | 2.15406700  |
| H | -4.88082000 | -0.93853300 | 1.30537600  |
| C | -2.71493800 | -0.83013600 | -1.28768700 |
| H | -1.88601900 | -1.53191600 | -1.38950400 |
| H | -2.67822500 | -0.16673900 | -2.15489400 |
| C | -2.71494900 | -0.82996900 | 1.28783500  |
| H | -2.67824200 | -0.16645800 | 2.15495600  |
| H | -1.88603200 | -1.53173700 | 1.38975200  |
| C | -4.12406900 | -2.48179000 | 0.00017600  |
| H | -5.05949500 | -3.04310600 | 0.00020800  |
| H | -3.31131100 | -3.21762800 | 0.00022900  |
| C | -0.59347800 | 3.26079700  | -0.00016200 |
| H | -1.07169700 | 4.23374300  | -0.00021400 |

**Allene 10H M052X/6-31G\***

1 1

|   |             |             |             |
|---|-------------|-------------|-------------|
| C | -1.55584600 | -0.68156200 | 0.00000500  |
| C | -1.24903600 | 0.71383300  | 0.00004200  |
| C | 0.00000000  | 1.32923500  | 0.00000000  |
| C | -0.70361500 | -1.76167300 | -0.00001300 |
| C | 1.24903600  | 0.71383300  | -0.00004200 |
| C | 0.70361500  | -1.76167300 | 0.00001300  |
| C | 1.55584600  | -0.68156200 | -0.00000500 |
| H | -1.17212200 | -2.74003300 | 0.00001000  |
| H | 1.17212200  | -2.74003300 | -0.00001000 |
| C | -2.50379400 | 1.45044300  | -0.00016100 |
| H | -2.56331600 | 2.52904800  | -0.00030500 |
| C | -3.53781400 | 0.58977600  | 0.00001600  |
| H | -4.58410500 | 0.85956900  | -0.00002600 |
| C | -3.05616500 | -0.82486300 | 0.00007900  |
| H | -3.40492000 | -1.37938200 | 0.87845500  |
| H | -3.40504700 | -1.37965400 | -0.87806600 |
| C | 3.05616500  | -0.82486300 | -0.00007900 |
| H | 3.40504600  | -1.37965400 | 0.87806700  |
| H | 3.40492000  | -1.37938300 | -0.87845500 |
| C | 2.50379400  | 1.45044300  | 0.00016100  |
| H | 2.56331600  | 2.52904800  | 0.00030500  |
| C | 3.53781400  | 0.58977600  | -0.00001600 |

|   |            |            |            |
|---|------------|------------|------------|
| H | 4.58410500 | 0.85956900 | 0.00002600 |
| H | 0.00000000 | 2.41404300 | 0.00000000 |

**Allene 11H M052X/6-31G\***

|     |             |             |             |
|-----|-------------|-------------|-------------|
| 1 1 |             |             |             |
| C   | -1.55996900 | 0.00686700  | 0.00003600  |
| C   | -1.22012500 | -1.38365000 | -0.00004900 |
| C   | 0.03476100  | -1.97408700 | -0.00008400 |
| C   | -0.72349600 | 1.09249900  | 0.00002000  |
| C   | 1.27999000  | -1.33932900 | -0.00002300 |
| C   | 0.70772400  | 1.12142900  | -0.00002900 |
| C   | 1.58134600  | 0.04733500  | -0.00000500 |
| C   | -2.46296500 | -2.14739500 | -0.00002900 |
| H   | -2.49738500 | -3.22713700 | -0.00007500 |
| C   | -3.51453500 | -1.31285100 | 0.00002900  |
| H   | -4.55475400 | -1.60492700 | 0.00003100  |
| C   | -3.06540800 | 0.11619600  | 0.00003700  |
| H   | -3.43084500 | 0.65899500  | -0.87854700 |
| H   | -3.43079700 | 0.65892100  | 0.87868800  |
| C   | 3.08107900  | 0.19960700  | 0.00000800  |
| H   | 3.43091200  | 0.75213900  | -0.87934700 |
| H   | 3.43095700  | 0.75233500  | 0.87921000  |
| C   | 2.53892700  | -2.07520000 | 0.00004600  |
| H   | 2.59864400  | -3.15385300 | 0.00006100  |
| C   | 3.57023800  | -1.21392100 | 0.00006400  |
| H   | 4.61772000  | -1.47847200 | 0.00012900  |
| C   | 1.12644400  | 2.52086800  | -0.00002200 |
| H   | 2.15663900  | 2.84426600  | -0.00002700 |
| C   | 0.04827600  | 3.32061000  | -0.00007000 |
| H   | 0.06350000  | 4.40090500  | -0.00012700 |
| C   | -1.21688800 | 2.51937900  | 0.00004200  |
| H   | -1.83551800 | 2.73265700  | -0.87838700 |
| H   | -1.83524700 | 2.73262700  | 0.87868500  |
| H   | 0.05377500  | -3.05859600 | -0.00012100 |

**Allene 12H M052X/6-31G\***

|     |             |             |             |
|-----|-------------|-------------|-------------|
| 1 1 |             |             |             |
| C   | -1.59468300 | 0.07887000  | -0.00002900 |
| C   | -1.28021400 | -1.29440600 | 0.00004900  |
| C   | -0.04066300 | -1.93053600 | 0.00006400  |
| C   | -0.69513600 | 1.16774000  | -0.00002600 |
| C   | 1.21450600  | -1.35109600 | 0.00000600  |
| C   | 0.71249800  | 1.12694900  | -0.00002100 |
| C   | 1.56633700  | 0.02314600  | -0.00003000 |
| C   | -2.57064100 | -2.07070100 | 0.00011800  |
| H   | -2.64348600 | -2.72217700 | 0.87851600  |
| C   | -3.61647400 | -1.00573000 | -0.00004300 |
| H   | -4.67700300 | -1.21031200 | -0.00008900 |
| C   | -3.04819500 | 0.21311200  | -0.00005100 |
| C   | 3.02345200  | 0.11589700  | -0.00001600 |

|   |             |             |             |
|---|-------------|-------------|-------------|
| C | 2.48622300  | -2.16044600 | -0.00000700 |
| H | 2.54632200  | -2.81266600 | 0.87836200  |
| C | 3.55733700  | -1.11788700 | -0.00006000 |
| H | 4.61255700  | -1.34947400 | -0.00008600 |
| H | 2.54630000  | -2.81282900 | -0.87824600 |
| H | -2.64349200 | -2.72270900 | -0.87785900 |
| H | -3.57610600 | 1.15370700  | -0.00008700 |
| H | 3.57244200  | 1.04553000  | 0.00000500  |
| C | -1.11041200 | 2.56795800  | -0.00002600 |
| H | -2.13615400 | 2.90172200  | -0.00001900 |
| C | -0.02633400 | 3.36182600  | -0.00002300 |
| H | -0.03104600 | 4.44196700  | -0.00002200 |
| C | 1.22315700  | 2.54388800  | -0.00001000 |
| H | 1.84561000  | 2.74607700  | 0.87920200  |
| H | 1.84567900  | 2.74611000  | -0.87916100 |
| H | -0.06616100 | -3.01645800 | 0.00010300  |

### Allene 13H M052X/6-31G\*

1 1

|   |             |             |             |
|---|-------------|-------------|-------------|
| C | -0.66817600 | 2.49712100  | -0.25686300 |
| C | -1.51317500 | 1.45164800  | -0.39661700 |
| C | -1.27671000 | 0.05865400  | -0.06416800 |
| C | 0.66814900  | 2.49713500  | 0.25687900  |
| C | 0.00001700  | -0.52959500 | 0.00001500  |
| C | 1.51317100  | 1.45168100  | 0.39663500  |
| C | 1.27673200  | 0.05867700  | 0.06419300  |
| H | -1.06231800 | 3.46965000  | -0.52603000 |
| H | -2.49163400 | 1.68486800  | -0.78951600 |
| H | 1.06226800  | 3.46967300  | 0.52604900  |
| H | 2.49161600  | 1.68492700  | 0.78954800  |
| N | -2.36303900 | -0.72347900 | 0.07349800  |
| N | 2.36305100  | -0.72346700 | -0.07350000 |
| C | -3.72048700 | -0.17655800 | 0.00069500  |
| H | -4.00210400 | 0.06779200  | -1.02569500 |
| H | -4.41163400 | -0.92413800 | 0.37594600  |
| H | -3.81174300 | 0.70948200  | 0.62759100  |
| C | -2.22315300 | -2.15845300 | 0.30395300  |
| H | -1.76188700 | -2.65100800 | -0.55543100 |
| H | -1.62406600 | -2.34818700 | 1.19663500  |
| H | -3.20796400 | -2.58804100 | 0.45232500  |
| C | 3.72052300  | -0.17659000 | -0.00077800 |
| H | 3.81179200  | 0.70941300  | -0.62772300 |
| H | 4.00219200  | 0.06779500  | 1.02558900  |
| H | 4.41162400  | -0.92421800 | -0.37602100 |
| C | 2.22311000  | -2.15844000 | -0.30391900 |
| H | 1.76188900  | -2.65096600 | 0.55550600  |
| H | 1.62395100  | -2.34817000 | -1.19655500 |
| H | 3.20789800  | -2.58805900 | -0.45235200 |
| H | 0.00003400  | -1.60387500 | 0.00000200  |

### Allene 14H M052X/6-31G\*

1 1

|   |             |             |             |
|---|-------------|-------------|-------------|
| C | 0.66692000  | 1.67335000  | 0.15260000  |
| C | 1.58314000  | 0.62535700  | 0.11201600  |
| C | 1.30129600  | -0.76292600 | -0.05704200 |
| C | -0.74549200 | 1.64836300  | 0.01422700  |
| C | 0.01102300  | -1.34539000 | -0.05959500 |
| C | -1.60718800 | 0.57734600  | -0.10340400 |
| C | -1.28166500 | -0.82674600 | -0.00005800 |
| C | 2.96886700  | 1.23107300  | 0.04837400  |
| H | 3.47665800  | 0.92638300  | -0.87421400 |
| C | 2.71598300  | 2.70166000  | 0.09829600  |
| H | 3.50467500  | 3.43980600  | 0.09655000  |
| C | 1.40065200  | 2.94196300  | 0.17901300  |
| H | 0.93109700  | 3.91190200  | 0.24165800  |
| C | -1.53788100 | 2.91745700  | -0.17448300 |
| H | -1.50318700 | 3.54814200  | 0.72165300  |
| H | -1.14086200 | 3.51943900  | -0.99922000 |
| C | -2.94492500 | 1.08649600  | -0.43137500 |
| H | -3.79658300 | 0.46274800  | -0.65095800 |
| C | -2.91681500 | 2.42782400  | -0.46819100 |
| H | -3.74815100 | 3.07735800  | -0.69877700 |
| H | 0.04638500  | -2.41952400 | 0.01863600  |
| H | 3.62237500  | 0.94572100  | 0.87436800  |
| N | -2.33122000 | -1.69527500 | 0.09947100  |
| N | 2.34458100  | -1.63805000 | -0.19192600 |
| C | -2.16684600 | -3.11018200 | -0.19583500 |
| H | -1.68541500 | -3.65564700 | 0.62399600  |
| H | -3.15799400 | -3.53398200 | -0.35094600 |
| H | -1.59358500 | -3.24075500 | -1.11237300 |
| C | 2.15713500  | -2.92373500 | -0.85071400 |
| H | 3.11793800  | -3.23120400 | -1.26252400 |
| H | 1.81517800  | -3.70406400 | -0.16092700 |
| H | 1.45056200  | -2.82524200 | -1.67245900 |
| C | 3.54776800  | -1.58254300 | 0.64060800  |
| H | 3.77851000  | -2.59940400 | 0.96046700  |
| H | 4.41047900  | -1.18825600 | 0.10154200  |
| H | 3.36479800  | -0.99445600 | 1.53577900  |
| C | -3.45035400 | -1.43764100 | 1.01085800  |
| H | -4.40454100 | -1.52536500 | 0.48951000  |
| H | -3.42212400 | -2.17835500 | 1.81449000  |
| H | -3.36946400 | -0.45233200 | 1.45916600  |

### Allene 15H M052X/6-31G\*

1 1

|   |             |             |            |
|---|-------------|-------------|------------|
| C | -1.58224700 | -0.11966600 | 0.22655600 |
| C | -1.24150500 | 1.29713800  | 0.19663400 |
| C | 0.00372500  | 1.90922700  | 0.24542400 |
| C | -0.69744900 | -1.16028500 | 0.50805100 |
| C | 1.26827200  | 1.32823200  | 0.24116500 |
| C | 0.72633000  | -1.12226800 | 0.61530300 |
| C | 1.60632000  | -0.07653400 | 0.30714300 |



|   |             |             |             |
|---|-------------|-------------|-------------|
| C | -2.44122400 | 2.05078900  | 0.10655000  |
| H | -2.46658500 | 3.12859100  | 0.08323500  |
| C | -3.52005000 | 1.20069000  | 0.03160300  |
| C | -3.03286100 | -0.18223600 | 0.07113400  |
| C | 3.04504800  | -0.15734800 | 0.14465100  |
| C | 2.46974100  | 2.07964800  | 0.17332600  |
| C | 3.54655400  | 1.21804200  | 0.11434500  |
| C | 1.16729500  | -2.41819900 | 1.15236800  |
| H | 2.17828900  | -2.62573500 | 1.46292500  |
| C | 0.12464800  | -3.23955000 | 1.31125900  |
| H | 0.15289000  | -4.23679200 | 1.72539300  |
| C | -1.13066800 | -2.57644600 | 0.84390600  |
| H | -1.92417300 | -2.60014800 | 1.59515300  |
| H | -1.50075900 | -3.09728900 | -0.04618600 |
| C | -3.78379600 | -1.32957300 | -0.10301700 |
| H | -3.24534900 | -2.26363000 | -0.13169000 |
| C | -5.16483000 | -1.47894900 | -0.27706400 |
| C | -6.17261700 | -0.51313400 | -0.31185200 |
| C | -4.88337400 | 1.63913400  | -0.06608300 |
| C | -6.03934600 | 0.88963500  | -0.20549300 |
| H | 2.50423400  | 3.15707300  | 0.13768400  |
| C | 4.91626300  | 1.62837200  | 0.03066200  |
| C | 6.05184700  | 0.85369200  | -0.15547000 |
| C | 3.74791400  | -1.31496700 | -0.14691800 |
| H | 3.16064700  | -2.21886700 | -0.25240600 |
| C | 5.11508600  | -1.48616800 | -0.37368000 |
| C | 6.14636400  | -0.53990800 | -0.35845300 |
| C | 5.32982900  | 3.02894000  | 0.14083300  |
| H | 4.65084600  | 3.85204400  | 0.30226500  |
| C | 6.66538300  | 3.11835000  | 0.03159200  |
| H | 7.25020100  | 4.02505000  | 0.08468100  |
| C | 7.40601100  | -1.23434300 | -0.62436000 |
| H | 8.36909900  | -0.74685900 | -0.66517700 |
| C | 7.17402400  | -2.54524800 | -0.81023900 |
| H | 7.91915700  | -3.29733700 | -1.02575400 |
| C | -5.25931900 | 3.05482000  | -0.02629500 |
| H | -4.55918700 | 3.86842100  | 0.08312900  |
| C | -6.59241100 | 3.17497000  | -0.13564200 |
| H | -7.15179600 | 4.09898800  | -0.13223400 |
| C | -7.45394300 | -1.19340500 | -0.49873600 |
| H | -8.40587100 | -0.68629600 | -0.55847800 |
| C | -7.25661400 | -2.52028900 | -0.58486700 |
| H | -8.02285200 | -3.26873700 | -0.72575100 |
| C | -7.22041000 | 1.82465000  | -0.26281100 |
| H | -7.77325200 | 1.72200900  | -1.20354200 |
| H | -7.93362700 | 1.62959200  | 0.54613200  |
| C | -5.80097100 | -2.83674400 | -0.45850000 |
| H | -5.60368000 | -3.49877100 | 0.39232200  |
| H | -5.42112400 | -3.34748900 | -1.35087900 |
| C | 5.71382300  | -2.83845800 | -0.67994400 |
| H | 5.51586200  | -3.56549000 | 0.11559000  |
| H | 5.30379000  | -3.26256300 | -1.60369000 |

|   |             |            |             |
|---|-------------|------------|-------------|
| C | 7.25665600  | 1.76065700 | -0.17285400 |
| H | 7.97196600  | 1.50415300 | 0.61684100  |
| H | 7.79811000  | 1.69571600 | -1.12344500 |
| H | -0.01182800 | 2.99476500 | 0.23252300  |

**Allene 16H M052X/6-31G\***

1 1

|   |             |             |             |
|---|-------------|-------------|-------------|
| C | -1.57147900 | 0.35326600  | -0.00001500 |
| C | -1.24058800 | -1.09105300 | -0.00002700 |
| C | 0.01958500  | -1.68348600 | -0.00004000 |
| C | -0.73633000 | 1.41832100  | -0.00001100 |
| C | 1.25976700  | -1.06228800 | -0.00003900 |
| C | 0.72743900  | 1.44154500  | -0.00001800 |
| C | 1.58980200  | 0.38223900  | -0.00002400 |
| C | -2.43979400 | -1.82437800 | -0.00003000 |
| H | -2.48440100 | -2.90533300 | -0.00003900 |
| C | -3.52186900 | -0.93474700 | -0.00002200 |
| C | -3.02951400 | 0.40789600  | -0.00001100 |
| C | 3.04450100  | 0.43726000  | -0.00002500 |
| C | 2.46724700  | -1.79767400 | -0.00006000 |
| H | 2.51259500  | -2.87851200 | -0.00007500 |
| C | 3.53761400  | -0.90943400 | -0.00005200 |
| C | 1.12097700  | 2.85010200  | -0.00002100 |
| H | 2.14412000  | 3.18787500  | -0.00003200 |
| C | 0.04270400  | 3.64550600  | -0.00001300 |
| H | 0.06218400  | 4.72610800  | -0.00001600 |
| C | -1.22908300 | 2.84888500  | -0.00000200 |
| H | -1.84517000 | 3.05936900  | -0.88075300 |
| H | -1.84515300 | 3.05936300  | 0.88076100  |
| C | -4.09340300 | 1.29678900  | 0.00001900  |
| H | -4.06942500 | 2.37525200  | 0.00003300  |
| C | 4.12316500  | 1.31515900  | 0.00002500  |
| H | 4.11842300  | 2.39337100  | 0.00005600  |
| C | 5.31514400  | 0.54719000  | 0.00002700  |
| C | 4.96269900  | -0.88130700 | -0.00001400 |
| C | -4.94078700 | -0.90033400 | 0.00000200  |
| C | -5.29270100 | 0.53141900  | 0.00001400  |
| C | 5.80217800  | -1.97693700 | -0.00002600 |
| H | 5.31242900  | -2.94518400 | -0.00006800 |
| C | -5.79052800 | -1.99418900 | 0.00000300  |
| H | -5.30551600 | -2.96484700 | -0.00001400 |
| C | -7.18622000 | -2.01267100 | 0.00001700  |
| H | -7.64175000 | -2.99519800 | 0.00001400  |
| C | -8.06811700 | -0.93682000 | 0.00003200  |
| H | -9.11937400 | -1.20077500 | 0.00004100  |
| C | 7.20280000  | -2.00350800 | 0.00000700  |
| H | 7.65168600  | -2.98911300 | -0.00000700 |
| C | 8.08664800  | -0.93561200 | 0.00005300  |
| H | 9.13716600  | -1.20223000 | 0.00007200  |
| C | 6.60177600  | 1.09646000  | 0.00006600  |
| H | 6.64321400  | 2.18064800  | 0.00009200  |

|   |             |             |             |
|---|-------------|-------------|-------------|
| C | 7.82268600  | 0.44220700  | 0.00007800  |
| H | 8.69661100  | 1.08205700  | 0.00011200  |
| C | -6.57227600 | 1.08469400  | 0.00003000  |
| H | -6.60923900 | 2.16912200  | 0.00004100  |
| C | -7.80081500 | 0.43514100  | 0.00003800  |
| H | -8.67113400 | 1.07977600  | 0.00005200  |
| H | 0.03334000  | -2.76958900 | -0.00005000 |

**Allene 17H M052X/6-31G\***

1 1

|   |             |             |             |
|---|-------------|-------------|-------------|
| C | 1.57435600  | -0.83160200 | 0.00001300  |
| C | 1.24264100  | 0.61082200  | 0.00003900  |
| C | -0.01721900 | 1.20062800  | 0.00004000  |
| C | 0.73724400  | -1.89653100 | -0.00000200 |
| C | -1.25850500 | 0.58092200  | 0.00002100  |
| C | -0.72449000 | -1.92016100 | -0.00000500 |
| C | -1.58899500 | -0.86185300 | 0.00000200  |
| C | 2.44527800  | 1.34361500  | 0.00005600  |
| H | 2.47905800  | 2.42419200  | 0.00008000  |
| C | 3.52998600  | 0.45952800  | 0.00004600  |
| C | 3.03017500  | -0.88658700 | 0.00001500  |
| C | -3.04341000 | -0.91716700 | -0.00001000 |
| C | -2.46768500 | 1.31561100  | 0.00002200  |
| H | -2.50102300 | 2.39602500  | 0.00003300  |
| C | -3.54307600 | 0.43348700  | -0.00000500 |
| C | -1.11761600 | -3.32994500 | -0.00001900 |
| H | -2.14097100 | -3.66716200 | -0.00002300 |
| C | -0.03962300 | -4.12526300 | -0.00002600 |
| H | -0.05854500 | -5.20591700 | -0.00003500 |
| C | 1.23131500  | -3.32657900 | -0.00002800 |
| H | 1.84887200  | -3.53545600 | -0.88036500 |
| H | 1.84890300  | -3.53548400 | 0.88028000  |
| C | 4.08693800  | -1.77781100 | -0.00002600 |
| H | 4.05883700  | -2.85627300 | -0.00005500 |
| C | -4.11418900 | -1.79644100 | -0.00002500 |
| H | -4.10645400 | -2.87474100 | -0.00003300 |
| C | -5.31416100 | -1.03126700 | 0.00001700  |
| C | -4.97228200 | 0.39419200  | -0.00002600 |
| C | 4.95449000  | 0.41225700  | 0.00002500  |
| C | 5.29358200  | -1.01649600 | -0.00002300 |
| C | -5.83631900 | 1.47463800  | -0.00004800 |
| C | -6.59058600 | -1.60106300 | 0.00004700  |
| H | -6.61509100 | -2.68727300 | 0.00005900  |
| C | 5.82846800  | 1.48950300  | 0.00004700  |
| C | 6.56430200  | -1.59105500 | -0.00005800 |
| H | 6.58387900  | -2.67741600 | -0.00008900 |
| C | -7.25366000 | 1.50001200  | -0.00003300 |
| C | -8.13382800 | 0.41424000  | 0.00001100  |
| C | -7.81872000 | -0.96990000 | 0.00005000  |
| C | 7.24210600  | 1.50686400  | 0.00002700  |
| C | 8.11879700  | 0.41389400  | -0.00002400 |

|   |              |             |             |
|---|--------------|-------------|-------------|
| C | 7.79838900   | -0.96543100 | -0.00006000 |
| C | -9.59318300  | 0.53691600  | 0.00002400  |
| H | -10.12400400 | 1.47655900  | 0.00000500  |
| C | -10.16030400 | -0.67969600 | 0.00006700  |
| H | -11.22152200 | -0.88219200 | 0.00008300  |
| C | 7.67367400   | 2.90998000  | 0.00006500  |
| H | 8.70524700   | 3.22788800  | 0.00006000  |
| C | 6.60835900   | 3.72234900  | 0.00010700  |
| H | 6.63142500   | 4.80215100  | 0.00014200  |
| C | 9.57864300   | 0.53142900  | -0.00005800 |
| H | 10.11320000  | 1.46892700  | -0.00004400 |
| C | 10.14073200  | -0.68775500 | -0.00009600 |
| H | 11.20098000  | -0.89523400 | -0.00012500 |
| C | -9.11420800  | -1.74906900 | 0.00008500  |
| H | -9.19136800  | -2.39818100 | -0.87897000 |
| H | -9.19134800  | -2.39811000 | 0.87919600  |
| C | 9.08924800   | -1.75128500 | -0.00010400 |
| H | 9.16344100   | -2.40081100 | -0.87919800 |
| H | 9.16347300   | -2.40083600 | 0.87897000  |
| C | 5.34188600   | 2.91935300  | 0.00010200  |
| H | 4.72424300   | 3.12277700  | 0.88133900  |
| H | 4.72422100   | 3.12283300  | -0.88110700 |
| C | -5.34237600  | 2.90239300  | -0.00007100 |
| H | -4.72390900  | 3.10322000  | 0.88118800  |
| H | -4.72389400  | 3.10318500  | -0.88132600 |
| C | -7.67559300  | 2.90552000  | -0.00007400 |
| H | -8.70508700  | 3.23005400  | -0.00007800 |
| C | -6.60530300  | 3.71129200  | -0.00009700 |
| H | -6.62261100  | 4.79124500  | -0.00012400 |
| H | -0.03160900  | 2.28708600  | 0.00005700  |

**Allene 18H M052X/6-31G\***

|     |             |             |             |
|-----|-------------|-------------|-------------|
| 1 1 |             |             |             |
| C   | -1.57283700 | -1.00705300 | -0.01547800 |
| C   | -1.24478800 | 0.43645300  | -0.01730200 |
| C   | 0.02357100  | 1.02334600  | -0.02066500 |
| C   | -0.73429900 | -2.06882800 | -0.01926600 |
| C   | 1.25617700  | 0.40062000  | -0.01974200 |
| C   | 0.72805200  | -2.10951100 | -0.02269200 |
| C   | 1.59160900  | -1.03618800 | -0.01554600 |
| C   | -2.44643400 | 1.16053800  | -0.01806700 |
| H   | -2.48149200 | 2.24156400  | -0.02079700 |
| C   | -3.53569200 | 0.27402900  | -0.01615600 |
| C   | -3.03087000 | -1.06840000 | -0.01472600 |
| C   | 3.03284100  | -1.09210200 | -0.00580400 |
| C   | 2.47506900  | 1.14166100  | -0.01927500 |
| H   | 2.50400600  | 2.22241400  | -0.02183900 |
| C   | 3.54114200  | 0.26232200  | -0.01138700 |
| C   | 1.11852800  | -3.49236000 | -0.04220200 |
| H   | 2.14067300  | -3.82465000 | -0.07758300 |
| C   | 0.01905100  | -4.30978700 | -0.03174400 |

|   |              |             |             |
|---|--------------|-------------|-------------|
| C | -1.24605800  | -3.48986900 | -0.02652000 |
| H | -1.86100300  | -3.69729600 | 0.85558200  |
| H | -1.86368600  | -3.68300300 | -0.90994700 |
| C | -4.08670000  | -1.96205700 | -0.01393500 |
| H | -4.05836200  | -3.04101400 | -0.01226900 |
| C | 4.10833800   | -1.97083600 | 0.01302400  |
| H | 4.09850000   | -3.04931600 | 0.02921700  |
| C | 5.30944500   | -1.20984500 | 0.01647400  |
| C | 4.98018900   | 0.21113400  | 0.00003500  |
| C | -4.95974000  | 0.22058500  | -0.01609800 |
| C | -5.29632400  | -1.20286900 | -0.01429800 |
| C | 5.84691200   | 1.28426800  | -0.00507000 |
| C | 6.59297000   | -1.77432200 | 0.03420600  |
| H | 6.62216700   | -2.86072800 | 0.04860300  |
| C | -5.84222600  | 1.29493200  | -0.01577500 |
| C | -6.57094200  | -1.77077300 | -0.01119600 |
| H | -6.59583100  | -2.85765700 | -0.00739700 |
| C | 7.26504700   | 1.33275800  | 0.00081400  |
| C | 8.15199200   | 0.24246700  | 0.02132200  |
| C | 7.81326100   | -1.13981900 | 0.03548400  |
| C | -7.24981000  | 1.33480600  | -0.01363300 |
| C | -8.13841300  | 0.23365100  | -0.01432900 |
| C | -7.79960500  | -1.14204700 | -0.01273500 |
| C | 9.58854600   | 0.37031900  | 0.03969500  |
| H | 10.11360300  | 1.31065000  | 0.05456900  |
| C | 10.17148600  | -0.86902000 | 0.04859800  |
| C | -7.68596000  | 2.71883300  | -0.00285700 |
| H | -8.71675000  | 3.03100200  | 0.01567100  |
| C | -6.60212300  | 3.54622800  | -0.01343600 |
| C | -9.57190300  | 0.36528700  | -0.00925000 |
| H | -10.09655300 | 1.30562100  | 0.00581600  |
| C | -10.15618200 | -0.87610500 | -0.01835900 |
| C | 9.10363800   | -1.93116600 | 0.06167200  |
| H | 9.16310700   | -2.55596200 | 0.95850000  |
| H | 9.18354700   | -2.59321700 | -0.80614900 |
| C | -9.08721300  | -1.93636900 | -0.00676200 |
| H | -9.15711000  | -2.57110500 | 0.88247400  |
| H | -9.15991800  | -2.58847600 | -0.88284100 |
| C | -5.34049100  | 2.71967400  | -0.00818400 |
| H | -4.72030900  | 2.92276200  | -0.88663500 |
| H | -4.72878800  | 2.90644900  | 0.88014700  |
| C | 5.33704300   | 2.70657000  | -0.03147600 |
| H | 4.72778800   | 2.88077200  | -0.92405500 |
| H | 4.71222100   | 2.91654800  | 0.84219000  |
| C | 7.68586800   | 2.71852100  | -0.02599400 |
| H | 8.71401000   | 3.03938300  | -0.04792400 |
| C | 6.59519400   | 3.53850100  | -0.03079700 |
| H | 0.03979100   | 2.11019100  | -0.02329900 |
| N | 0.00245700   | -5.65810100 | -0.00153900 |
| C | 1.26864200   | -6.36031500 | -0.09673600 |
| H | 1.09989200   | -7.42195800 | 0.07144800  |
| H | 1.73296400   | -6.22311900 | -1.07895000 |

|   |              |             |             |
|---|--------------|-------------|-------------|
| H | 1.95044000   | -5.99106700 | 0.67030900  |
| C | -1.20159900  | -6.41038300 | -0.30690200 |
| H | -1.16542700  | -7.36684500 | 0.21366700  |
| H | -2.07849400  | -5.86977300 | 0.04130300  |
| H | -1.30514500  | -6.59921300 | -1.38083000 |
| N | -11.47260600 | -1.17019000 | -0.06120500 |
| N | -6.57938600  | 4.90382400  | -0.06667500 |
| N | 6.56543800   | 4.89520000  | 0.00376000  |
| N | 11.49028800  | -1.16598300 | 0.01709800  |
| C | -12.41855100 | -0.07420800 | 0.03686800  |
| H | -12.38189000 | 0.40478000  | 1.02123800  |
| H | -12.19448300 | 0.67187100  | -0.72650200 |
| H | -13.42308700 | -0.45443400 | -0.13614400 |
| C | -11.95156100 | -2.50453800 | 0.25422300  |
| H | -11.26863300 | -3.25125200 | -0.14524900 |
| H | -12.05542900 | -2.66064000 | 1.33361000  |
| H | -12.92309200 | -2.65276100 | -0.21481000 |
| C | -7.84838300  | 5.59345900  | 0.05879400  |
| H | -7.69552100  | 6.65696200  | -0.11453900 |
| H | -8.54155000  | 5.21763100  | -0.69458500 |
| H | -8.29478100  | 5.45237600  | 1.05014700  |
| C | -5.39191300  | 5.62531200  | 0.35359800  |
| H | -4.50196200  | 5.14657900  | -0.05123000 |
| H | -5.43634500  | 6.63881100  | -0.04267800 |
| H | -5.29915000  | 5.67941800  | 1.44495200  |
| C | 5.37416000   | 5.60985500  | -0.41762100 |
| H | 5.40936500   | 6.62183100  | -0.01639500 |
| H | 5.28633900   | 5.66846600  | -1.50898500 |
| H | 4.48613700   | 5.12246700  | -0.01934300 |
| C | 7.83072900   | 5.59266100  | -0.11785500 |
| H | 8.28466100   | 5.44688900  | -1.10489800 |
| H | 7.66900600   | 6.65637400  | 0.04574000  |
| H | 8.52114400   | 5.22761700  | 0.64330000  |
| C | 11.96395100  | -2.48959500 | 0.38164600  |
| H | 11.28806400  | -3.24896500 | -0.00594600 |
| H | 12.94300200  | -2.65138300 | -0.06705800 |
| H | 12.05085800  | -2.61352800 | 1.46696200  |
| C | 12.43338700  | -0.06835100 | 0.11625100  |
| H | 13.43982800  | -0.44765600 | -0.04841600 |
| H | 12.21304500  | 0.67289800  | -0.65284500 |
| H | 12.38999300  | 0.41699700  | 1.09761100  |

**Allene 19H M052X/6-31G\***

1 1

|   |             |             |             |
|---|-------------|-------------|-------------|
| C | 1.56449600  | 0.93858500  | -0.09950800 |
| C | 1.22562300  | -0.49549400 | -0.07754000 |
| C | 0.00281100  | -1.09468500 | -0.01770000 |
| C | 0.69880800  | 2.01722400  | -0.05739900 |
| C | -1.27959400 | -0.48948700 | 0.04235300  |
| C | -0.71745900 | 2.03369300  | 0.01418800  |
| C | -1.61651100 | 0.95827900  | 0.05856900  |

|   |              |             |             |
|---|--------------|-------------|-------------|
| C | 2.47524700   | -1.23934700 | -0.13701600 |
| H | 2.51083300   | -2.32012200 | -0.13472600 |
| C | 3.51687600   | -0.36259300 | -0.19373100 |
| C | 2.98607400   | 0.99337300  | -0.17335300 |
| C | -3.02252200  | 1.02290900  | 0.12416400  |
| C | -2.44931900  | -1.22698900 | 0.09737200  |
| H | -2.48816400  | -2.30584700 | 0.09589500  |
| C | -3.54126200  | -0.31409900 | 0.14666900  |
| C | -1.13351300  | 3.43837700  | 0.03379600  |
| H | -2.15983600  | 3.76125700  | 0.08471300  |
| C | -0.06366300  | 4.24556400  | -0.02039100 |
| H | -0.08562400  | 5.32600000  | -0.01995500 |
| C | 1.19803100   | 3.44131200  | -0.08450900 |
| H | 1.86043400   | 3.65351900  | 0.76229600  |
| H | 1.76778600   | 3.65194700  | -0.99664500 |
| C | 4.06297800   | 1.85998400  | -0.24003900 |
| H | 4.04534100   | 2.94022600  | -0.25796300 |
| C | -4.12869200  | 1.93518200  | 0.18530000  |
| H | -4.10082300  | 3.01311600  | 0.20402000  |
| C | -5.29137000  | 1.20539500  | 0.22775900  |
| C | -4.94136800  | -0.26274800 | 0.20540900  |
| C | 4.96090000   | -0.28491800 | -0.26361600 |
| C | 5.27291200   | 1.09863000  | -0.29438300 |
| C | -5.81444400  | -1.33795500 | 0.30303700  |
| C | -6.59208800  | 1.75898300  | 0.30680000  |
| H | -6.62355300  | 2.84358300  | 0.36314500  |
| C | 5.84986000   | -1.38016400 | -0.36493000 |
| C | 6.57253300   | 1.70470500  | -0.39722200 |
| H | 6.57026900   | 2.78644700  | -0.48986200 |
| C | -7.22656900  | -1.36916500 | 0.31662300  |
| C | -8.12122600  | -0.27814500 | 0.17077800  |
| C | -7.79706700  | 1.12453400  | 0.27978900  |
| C | 7.23830900   | -1.39645600 | -0.34557200 |
| C | 8.14801600   | -0.29235100 | -0.14768200 |
| C | 7.78342400   | 1.10604100  | -0.33922900 |
| C | -9.52103200  | -0.39799400 | -0.08351100 |
| C | -10.15829400 | 0.87863300  | 0.07562400  |
| C | 7.67224300   | -2.76945000 | -0.63574700 |
| H | 8.70110800   | -3.06280300 | -0.77350500 |
| C | 6.60603400   | -3.57571600 | -0.76612900 |
| H | 6.62827200   | -4.63073100 | -0.99696400 |
| C | 9.50236000   | -0.38704300 | 0.16860000  |
| C | 10.14278400  | 0.90542100  | 0.00788000  |
| C | -9.08896200  | 1.90801200  | 0.31714000  |
| H | -9.23390700  | 2.39562200  | 1.28645200  |
| H | -9.12829500  | 2.68893000  | -0.44754300 |
| C | 9.07048500   | 1.89899400  | -0.37772700 |
| H | 9.04492100   | 2.75397500  | 0.30112200  |
| H | 9.25649000   | 2.28524800  | -1.38471800 |
| C | 5.35026400   | -2.78700600 | -0.57744400 |
| H | 4.68907100   | -2.85878600 | -1.44755400 |
| H | 4.78056300   | -3.13916700 | 0.29078600  |

|   |              |             |             |
|---|--------------|-------------|-------------|
| C | -5.30229600  | -2.75234800 | 0.44427600  |
| H | -4.75515900  | -3.06395200 | -0.45275900 |
| H | -4.61267500  | -2.84958800 | 1.28875200  |
| C | -7.62726200  | -2.75880600 | 0.57428000  |
| H | -8.63986700  | -3.08057100 | 0.76029900  |
| C | -6.54763800  | -3.55315900 | 0.64765200  |
| H | -6.55573100  | -4.61270000 | 0.85844900  |
| C | -10.16800300 | -1.55293800 | -0.61250800 |
| H | -9.51094200  | -2.34341400 | -0.94706000 |
| C | 10.15215200  | -1.54449200 | 0.73973300  |
| H | 9.48681600   | -2.33678900 | 1.05793600  |
| C | 11.46872500  | -1.74835100 | 0.99061000  |
| H | 11.71436200  | -2.70226000 | 1.44386400  |
| C | 12.60045200  | -0.88595900 | 0.75991100  |
| H | 13.56887500  | -1.33129300 | 0.95304800  |
| C | -11.50571600 | -1.78485700 | -0.79572500 |
| H | -11.75210100 | -2.75440400 | -1.21327100 |
| C | -12.62326000 | -0.95313000 | -0.52029400 |
| H | -13.59445500 | -1.40788400 | -0.67129500 |
| C | -11.48851600 | 1.20350000  | 0.06123500  |
| H | -11.71738600 | 2.24517300  | 0.26027900  |
| C | -12.61187900 | 0.36395500  | -0.14793900 |
| H | -13.57713400 | 0.84184300  | -0.03103400 |
| C | 11.45078900  | 1.25090100  | 0.09735400  |
| H | 11.68291600  | 2.29056000  | -0.10913000 |
| C | 12.58655200  | 0.41616100  | 0.38618200  |
| H | 13.54851100  | 0.90896900  | 0.30498100  |
| H | -0.00220500  | -2.18112700 | -0.01549500 |

## M062X

### Neutral

#### Allene 1 M062X/6-31G\*

|     |             |             |             |
|-----|-------------|-------------|-------------|
| 0 1 |             |             |             |
| C   | 0.69616300  | 1.27978000  | 0.21371900  |
| C   | 1.60088900  | 0.26531900  | 0.18670400  |
| C   | 1.22076500  | -1.03739000 | -0.35877200 |
| C   | -0.69628400 | 1.27971800  | -0.21373400 |
| C   | 0.00004100  | -1.39328800 | -0.00003900 |
| C   | -1.60092700 | 0.26518700  | -0.18672400 |
| C   | -1.22065400 | -1.03745800 | 0.35883600  |
| H   | 1.06518100  | 2.25242900  | 0.53554300  |
| H   | 2.62245600  | 0.45932000  | 0.51132800  |
| H   | 1.84606500  | -1.57715400 | -1.06459700 |
| H   | -1.06536900 | 2.25232700  | -0.53560500 |
| H   | -2.62249100 | 0.45906800  | -0.51142600 |
| H   | -1.84580200 | -1.57719800 | 1.06481400  |

#### Allene 2 M062X/6-31G\*



|   |   |             |             |             |
|---|---|-------------|-------------|-------------|
| 0 | 1 |             |             |             |
| C |   | 0.36605700  | -0.61130500 | -0.10342900 |
| C |   | 0.54041600  | 0.75629200  | -0.11309900 |
| C |   | -0.57057200 | 1.64798300  | -0.42887200 |
| C |   | -0.82768900 | -1.39251400 | -0.33439500 |
| C |   | -1.70941500 | 1.23164800  | 0.10034100  |
| C |   | -2.12388100 | -1.05009700 | -0.08992100 |
| C |   | -2.44577900 | 0.22686300  | 0.54522700  |
| H |   | -0.47402200 | 2.47252000  | -1.13052300 |
| H |   | -0.65002600 | -2.40378500 | -0.70087500 |
| H |   | -2.90623300 | -1.77643500 | -0.30536700 |
| H |   | -3.14619200 | 0.29509900  | 1.37395800  |
| C |   | 1.95770000  | 1.06679400  | 0.10597800  |
| H |   | 2.35721800  | 2.07384600  | 0.15020500  |
| C |   | 2.65153000  | -0.07752300 | 0.22655900  |
| H |   | 3.71838900  | -0.17157700 | 0.39197200  |
| C |   | 1.72204000  | -1.24973600 | 0.09300400  |
| H |   | 1.74977800  | -1.89908900 | 0.97845700  |
| H |   | 1.98864000  | -1.88101500 | -0.76618700 |

**Allene 3 M062X/6-31G\***

|   |   |             |             |             |
|---|---|-------------|-------------|-------------|
| 0 | 1 |             |             |             |
| C |   | -0.75893100 | -0.03434500 | -0.18879100 |
| C |   | -1.42973900 | 1.15799000  | -0.03019000 |
| C |   | -2.86514000 | 1.25231400  | -0.27666100 |
| C |   | -1.27972100 | -1.33690000 | -0.53493600 |
| C |   | -3.51614500 | 0.19489000  | 0.17827800  |
| C |   | -2.51417800 | -1.85462400 | -0.27706300 |
| C |   | -3.49547700 | -1.09087800 | 0.48979800  |
| H |   | -3.30294600 | 2.04448000  | -0.87865800 |
| H |   | -0.56616800 | -2.01091600 | -1.00924000 |
| H |   | -2.72732900 | -2.87652500 | -0.58752800 |
| H |   | -4.06129800 | -1.53923500 | 1.30262500  |
| C |   | -0.46490700 | 2.21456100  | 0.29073900  |
| H |   | -0.73586000 | 3.24875700  | 0.47228400  |
| C |   | 0.77107100  | 1.69245000  | 0.31424400  |
| H |   | 1.68644400  | 2.23615300  | 0.51961700  |
| C |   | 0.73179500  | 0.21566900  | -0.00592500 |
| C |   | 1.51853100  | -0.08364200 | -1.30516200 |
| H |   | 1.13605500  | 0.55262700  | -2.11105700 |
| H |   | 1.32934600  | -1.12586200 | -1.59724300 |
| C |   | 1.30095300  | -0.63951300 | 1.14980700  |
| H |   | 0.76328900  | -0.39601400 | 2.07286300  |
| H |   | 1.09365600  | -1.69573400 | 0.92793000  |
| C |   | 3.02725600  | 0.10317100  | -1.12567300 |
| H |   | 3.54105400  | -0.15246500 | -2.05903800 |
| H |   | 3.24909700  | 1.15974900  | -0.92634500 |
| C |   | 2.80926600  | -0.45384500 | 1.32578500  |
| H |   | 3.16807700  | -1.10533600 | 2.13032600  |
| H |   | 3.02234300  | 0.57668500  | 1.64001100  |
| C |   | 3.55711300  | -0.75480900 | 0.02499200  |

|   |            |             |             |
|---|------------|-------------|-------------|
| H | 3.42084100 | -1.81583000 | -0.22818000 |
| H | 4.63291600 | -0.59547700 | 0.15618000  |

**Allene 4 M062X/6-31G\***

|   |             |             |             |
|---|-------------|-------------|-------------|
| 0 | 1           |             |             |
| C | -0.53120100 | 0.64524600  | 0.27331300  |
| C | -0.44552100 | -0.78263900 | -0.01812600 |
| C | 0.70859900  | -1.38498300 | 0.26558800  |
| C | 0.52804000  | 1.47543000  | 0.08183700  |
| C | 2.00195700  | -1.17214800 | 0.45370000  |
| C | 1.86144800  | 1.12577900  | -0.38071500 |
| C | 2.54694100  | -0.04683500 | -0.30535100 |
| H | 2.60397800  | -1.70054600 | 1.19082900  |
| H | 3.53985100  | -0.10011900 | -0.75064300 |
| C | -1.77826600 | -1.20273300 | -0.46984200 |
| H | -2.00870100 | -2.18735300 | -0.85874100 |
| C | -2.65686000 | -0.21691100 | -0.23111800 |
| H | -3.72629100 | -0.27808500 | -0.39951200 |
| C | -1.99697300 | 1.00730600  | 0.37736900  |
| H | -2.33340000 | 1.14982100  | 1.41424800  |
| H | -2.22451000 | 1.93202400  | -0.16426600 |
| H | 0.33473100  | 2.54544600  | 0.14471000  |
| H | 2.38535200  | 1.95374100  | -0.85655100 |

**Allene 5 M062X/6-31G\***

|   |             |             |             |
|---|-------------|-------------|-------------|
| 0 | 1           |             |             |
| C | -0.68376000 | -0.17326200 | 0.03814600  |
| C | -1.39238000 | 1.06515800  | -0.27340000 |
| C | -2.62474100 | 1.19602600  | 0.21385800  |
| C | -1.33669700 | -1.36410400 | 0.09212600  |
| C | -3.67243200 | 0.51867500  | 0.65725400  |
| C | -2.75546300 | -1.61511100 | -0.11420900 |
| C | -3.83432900 | -0.80503600 | 0.05596700  |
| H | -0.72875000 | -2.26487700 | 0.15902000  |
| H | -4.30231700 | 0.84427900  | 1.48307300  |
| H | -2.97005000 | -2.62892500 | -0.45006600 |
| H | -4.82270000 | -1.19440500 | -0.18573200 |
| C | -0.44083500 | 1.91986300  | -0.99239200 |
| H | -0.69714700 | 2.86317200  | -1.46012900 |
| C | 0.78738800  | 1.39133700  | -0.88752700 |
| H | 1.69037100  | 1.85298300  | -1.27317900 |
| C | 0.80957500  | 0.08387700  | -0.09646700 |
| C | 1.55102100  | -1.04383300 | -0.83600900 |
| H | 1.10394300  | -1.18612100 | -1.82632300 |
| H | 1.40613600  | -1.98004300 | -0.27887100 |
| C | 1.46463300  | 0.29991500  | 1.29096800  |
| H | 0.95119400  | 1.11837400  | 1.80779200  |
| H | 1.30214200  | -0.61081300 | 1.88433900  |
| C | 3.05480100  | -0.77608300 | -0.94487200 |
| H | 3.23135100  | 0.10793000  | -1.57209000 |

|   |            |             |             |
|---|------------|-------------|-------------|
| H | 3.54142100 | -1.61697500 | -1.45105800 |
| C | 3.67830700 | -0.55405700 | 0.43521300  |
| C | 2.96637800 | 0.57303500  | 1.18633100  |
| H | 3.13384100 | 1.52492500  | 0.66474800  |
| H | 3.39086800 | 0.68962500  | 2.18949500  |
| H | 4.74760700 | -0.33592200 | 0.34011800  |
| H | 3.59329200 | -1.48161200 | 1.01894700  |

**Allene 6 M062X/6-31G\***

|     |             |             |             |
|-----|-------------|-------------|-------------|
| 0 1 |             |             |             |
| C   | -0.70477100 | -0.45229600 | -0.05527100 |
| C   | -1.58281100 | 0.59041900  | 0.16603500  |
| C   | -1.12644000 | 1.89867300  | 0.59667000  |
| C   | 0.73635300  | -0.43905200 | 0.01596100  |
| C   | -0.00559900 | 2.28270900  | -0.00046100 |
| C   | 1.60271000  | 0.61580500  | -0.17901300 |
| C   | 1.12130400  | 1.92840400  | -0.59777400 |
| H   | -1.60846400 | 2.43899700  | 1.40883900  |
| H   | 1.59092100  | 2.47805200  | -1.41032700 |
| C   | -2.99610900 | 0.08920400  | 0.04403600  |
| H   | -3.56977500 | 0.26887300  | 0.96427400  |
| C   | -2.81641900 | -1.37473700 | -0.24288100 |
| H   | -3.63663300 | -2.06604100 | -0.39436500 |
| C   | -1.50771400 | -1.66782700 | -0.29090100 |
| H   | -1.07993500 | -2.64585000 | -0.48467800 |
| C   | 1.56119400  | -1.67854400 | 0.27258100  |
| H   | 1.30870100  | -2.15589100 | 1.22910400  |
| H   | 1.39313400  | -2.43615600 | -0.50614000 |
| C   | 2.98264600  | 0.14113500  | -0.02271700 |
| H   | 3.85498300  | 0.77781800  | -0.11904100 |
| C   | 2.97617100  | -1.17610400 | 0.24007700  |
| H   | 3.84145900  | -1.80916300 | 0.39660500  |
| H   | -3.53748800 | 0.60262300  | -0.76231600 |

**Allene 7 M062X/6-31G\***

|     |             |            |             |
|-----|-------------|------------|-------------|
| 0 1 |             |            |             |
| C   | 1.20964700  | 0.84290800 | -0.10528800 |
| C   | 1.51366700  | 2.18976200 | -0.08352400 |
| C   | 0.51386800  | 3.22064500 | -0.35263900 |
| C   | -0.10213900 | 0.23181800 | -0.20780000 |
| C   | -0.62507900 | 2.98175600 | 0.27223200  |
| C   | -1.31843700 | 0.77230200 | 0.17516000  |
| C   | -1.43849200 | 2.07434900 | 0.79747900  |
| H   | 0.67885300  | 4.01610100 | -1.07528200 |
| H   | -2.05911300 | 2.24309700 | 1.67562900  |
| C   | 2.94642600  | 2.36411300 | 0.16695500  |
| H   | 3.43088000  | 3.33098700 | 0.24768000  |
| C   | 3.52633100  | 1.16100200 | 0.27462700  |
| H   | 4.58071700  | 0.97387000 | 0.44447600  |
| C   | 2.51609300  | 0.06048700 | 0.03577600  |

|   |             |             |             |
|---|-------------|-------------|-------------|
| C | 2.90799700  | -0.64956600 | -1.29130900 |
| H | 3.02113100  | 0.11075300  | -2.07187100 |
| H | 2.09895200  | -1.31213000 | -1.61186200 |
| C | 2.46283400  | -0.95083200 | 1.20093400  |
| H | 2.26374500  | -0.40739500 | 2.13144800  |
| H | 1.61319900  | -1.62810500 | 1.04189500  |
| C | 4.18419700  | -1.48397300 | -1.14863900 |
| H | 4.38498600  | -2.00308100 | -2.09249700 |
| H | 5.04431400  | -0.82725100 | -0.96440500 |
| C | 3.74368200  | -1.78027400 | 1.31555000  |
| H | 3.63581300  | -2.51067700 | 2.12504500  |
| H | 4.58596800  | -1.13135100 | 1.59040500  |
| C | 4.06053200  | -2.48966600 | -0.00237100 |
| H | 3.25195700  | -3.19900000 | -0.23140100 |
| H | 4.98070000  | -3.07691800 | 0.09018000  |
| C | -2.44087100 | -0.21806800 | -0.02949100 |
| C | -0.38403900 | -1.16066800 | -0.62941100 |
| H | 0.36270600  | -1.86921100 | -0.96372100 |
| C | -1.69610900 | -1.42232100 | -0.54284400 |
| H | -2.17005100 | -2.36300700 | -0.80077700 |
| C | -3.45171600 | 0.32859200  | -1.06598100 |
| H | -2.93142100 | 0.50453400  | -2.01391800 |
| C | -3.17506700 | -0.51571400 | 1.29759800  |
| H | -2.46249900 | -0.93124900 | 2.01871500  |
| C | -4.36873500 | -1.45336400 | 1.10047700  |
| H | -4.01468300 | -2.43750100 | 0.76567600  |
| H | -4.87317400 | -1.61258800 | 2.05997500  |
| C | -4.64602000 | -0.60745300 | -1.25947700 |
| H | -5.34794900 | -0.16573800 | -1.97541300 |
| H | -4.30462100 | -1.55464900 | -1.69861800 |
| C | -5.34895700 | -0.88875000 | 0.07007100  |
| H | -5.77432400 | 0.04823700  | 0.45625600  |
| H | -6.18550600 | -1.58024700 | -0.07856100 |
| H | -3.80797700 | 1.30448100  | -0.70785300 |
| H | -3.54028400 | 0.43553600  | 1.71028700  |

**Allene 8 M062X/6-31G\***

|     |             |             |             |
|-----|-------------|-------------|-------------|
| 0 1 |             |             |             |
| C   | -0.80172500 | -0.46070200 | -0.33880200 |
| C   | -1.51068200 | 0.75025600  | 0.05509400  |
| C   | -0.94396200 | 1.92657400  | -0.22195100 |
| C   | 0.55784200  | -0.53966900 | -0.26316500 |
| C   | 0.22515100  | 2.50000700  | -0.47223000 |
| C   | 1.51337400  | 0.50913600  | 0.13809700  |
| C   | 1.39641000  | 1.86123900  | 0.12303400  |
| H   | 0.34993900  | 3.32487900  | -1.17261300 |
| H   | 2.24426800  | 2.45953800  | 0.45965200  |
| C   | -2.80557600 | 0.32354300  | 0.60218400  |
| H   | -3.52105000 | 0.99465600  | 1.06210800  |
| C   | -2.98813600 | -0.98090600 | 0.34854100  |
| H   | -3.88597600 | -1.54427100 | 0.57685400  |

|   |             |             |             |
|---|-------------|-------------|-------------|
| C | -1.79839900 | -1.59939600 | -0.36194200 |
| H | -2.07407300 | -1.92094800 | -1.37665400 |
| H | -1.41155600 | -2.48331200 | 0.15874500  |
| C | 2.81163100  | -0.19215300 | 0.51524700  |
| H | 3.68319800  | 0.26264400  | 0.02953500  |
| H | 2.98725700  | -0.13235000 | 1.59847700  |
| C | 1.32618900  | -1.79162400 | -0.34303600 |
| H | 0.89945800  | -2.72769800 | -0.68690200 |
| C | 2.58181400  | -1.61475900 | 0.08628500  |
| H | 3.34495000  | -2.38242200 | 0.14666000  |

**Allene 9 M062X/6-31G\***

0 1

|   |             |             |             |
|---|-------------|-------------|-------------|
| C | -1.16293600 | 0.77271500  | -0.10543900 |
| C | -1.31264500 | 2.11949100  | 0.43400200  |
| C | -0.46810300 | 3.07044400  | 0.02840200  |
| C | 0.07122500  | 0.28475300  | -0.44270200 |
| C | 0.73514100  | 3.26876500  | -0.48282700 |
| C | 1.38870300  | 0.92896700  | -0.24081400 |
| C | 1.72553000  | 2.24040300  | -0.16284800 |
| H | 0.96484100  | 4.05045300  | -1.20568800 |
| H | 2.76485300  | 2.51177900  | 0.02255300  |
| C | -2.54719300 | 2.14183000  | 1.22235600  |
| H | -2.87464200 | 2.98934500  | 1.81305800  |
| C | -3.23426000 | 1.01656600  | 0.99029200  |
| H | -4.22102400 | 0.80412100  | 1.38749700  |
| C | -2.49043300 | 0.03391400  | 0.08965200  |
| C | 0.37443300  | -1.09483700 | -0.86397400 |
| H | -0.36947100 | -1.78323300 | -1.24632200 |
| C | 1.67715800  | -1.36547400 | -0.73240900 |
| H | 2.14385700  | -2.31312200 | -0.97938000 |
| C | 3.93828900  | -1.51038600 | 1.40823900  |
| H | 4.22932600  | -1.61956100 | 2.45888700  |
| H | 3.51640500  | -2.47572700 | 1.09721200  |
| C | 5.16152100  | -1.18743900 | 0.54730900  |
| H | 5.90953800  | -1.98349400 | 0.62962700  |
| H | 5.63113800  | -0.26837100 | 0.92558400  |
| C | 4.76346800  | -0.97641400 | -0.91503200 |
| H | 5.64030200  | -0.70449600 | -1.51285300 |
| H | 4.38675900  | -1.92033400 | -1.33066900 |
| C | 2.87394700  | -0.41907700 | 1.27887100  |
| H | 1.98571000  | -0.66324900 | 1.87255400  |
| H | 3.27453200  | 0.52640200  | 1.67068700  |
| C | 3.69858100  | 0.11668000  | -1.04293500 |
| H | 4.14012800  | 1.06369900  | -0.70736600 |
| H | 3.40013100  | 0.25613600  | -2.08822100 |
| C | 2.44774100  | -0.18262000 | -0.19144000 |
| C | -4.56782600 | -0.87755000 | -1.09149400 |
| H | -5.25484600 | -0.23804300 | -0.52144000 |
| H | -5.02777100 | -1.03128700 | -2.07381800 |
| C | -3.70798900 | -2.02366100 | 0.98647600  |

|   |             |             |             |
|---|-------------|-------------|-------------|
| H | -3.55680900 | -2.99226700 | 1.47566100  |
| H | -4.36074200 | -1.43994800 | 1.64818600  |
| C | -3.22247900 | -0.16826900 | -1.25698500 |
| H | -2.57591900 | -0.77154700 | -1.91035800 |
| H | -3.35033500 | 0.80493500  | -1.74397900 |
| C | -2.35544700 | -1.32043600 | 0.82424700  |
| H | -1.88210100 | -1.15242500 | 1.79830200  |
| H | -1.69388600 | -1.98567400 | 0.26137700  |
| C | -4.39757400 | -2.21446500 | -0.36706700 |
| H | -5.36805900 | -2.70509700 | -0.23481900 |
| H | -3.78502600 | -2.88239900 | -0.98955400 |

**Allene 10 M062X/6-31G\***

|     |             |             |             |
|-----|-------------|-------------|-------------|
| 0 1 |             |             |             |
| C   | -1.55687900 | 0.60235300  | 0.32884200  |
| C   | -1.23546800 | -0.74050500 | -0.13934600 |
| C   | 0.00000100  | -1.24993800 | 0.00000500  |
| C   | -0.69017400 | 1.64586400  | 0.21524300  |
| C   | 1.23547300  | -0.74050600 | 0.13934300  |
| C   | 0.69017100  | 1.64586600  | -0.21523200 |
| C   | 1.55687700  | 0.60235700  | -0.32883600 |
| H   | -1.09906100 | 2.63759400  | 0.40589200  |
| H   | 1.09905400  | 2.63759700  | -0.40588500 |
| C   | -2.49980900 | -1.32726100 | -0.60645000 |
| H   | -2.57050800 | -2.28696000 | -1.10484700 |
| C   | -3.52538900 | -0.55056800 | -0.22466500 |
| H   | -4.57547900 | -0.77952300 | -0.36897300 |
| C   | -3.05615400 | 0.68859100  | 0.51211300  |
| H   | -3.45995700 | 1.61718200  | 0.09333600  |
| H   | -3.36537100 | 0.65061900  | 1.56657200  |
| C   | 3.05615100  | 0.68859600  | -0.51211700 |
| H   | 3.36535700  | 0.65063700  | -1.56657900 |
| H   | 3.45996000  | 1.61718200  | -0.09333300 |
| C   | 2.49981200  | -1.32724400 | 0.60647200  |
| H   | 2.57051000  | -2.28693300 | 1.10488800  |
| C   | 3.52539200  | -0.55058100 | 0.22463000  |
| H   | 4.57548300  | -0.77954500 | 0.36891800  |

**Allene 11 M062X/6-31G\***

|     |             |             |             |
|-----|-------------|-------------|-------------|
| 0 1 |             |             |             |
| C   | -1.56470400 | -0.05378800 | 0.29435000  |
| C   | -1.20769900 | -1.39649400 | -0.15299500 |
| C   | 0.03270400  | -1.89240600 | -0.00864900 |
| C   | -0.71074800 | 0.99846700  | 0.19635600  |
| C   | 1.26190200  | -1.36447700 | 0.14208200  |
| C   | 0.70032500  | 1.01485800  | -0.20748700 |
| C   | 1.58775100  | -0.01974700 | -0.30600000 |
| C   | -2.45544900 | -2.01989500 | -0.61938100 |
| H   | -2.49701900 | -2.99166600 | -1.09720300 |
| C   | -3.50287500 | -1.26205100 | -0.26296500 |

|   |             |             |             |
|---|-------------|-------------|-------------|
| H | -4.54618400 | -1.51759000 | -0.41112200 |
| C | -3.06950600 | 0.00875700  | 0.44026500  |
| H | -3.48370400 | 0.91009700  | -0.02747400 |
| H | -3.40481800 | 0.01615900  | 1.48753200  |
| C | 3.09284400  | 0.08597600  | -0.42987100 |
| H | 3.44703000  | 0.10619900  | -1.47071800 |
| H | 3.47410200  | 0.99337800  | 0.05325400  |
| C | 2.51954100  | -1.96019400 | 0.61763000  |
| H | 2.58019200  | -2.93225400 | 1.09282900  |
| C | 3.55102600  | -1.17515400 | 0.27357100  |
| H | 4.59899700  | -1.40552900 | 0.42993200  |
| C | 1.06638100  | 2.43025100  | -0.37752000 |
| H | 2.04439000  | 2.75164500  | -0.71823600 |
| C | 0.04882600  | 3.23575100  | -0.05177500 |
| H | 0.06202300  | 4.31916100  | -0.08540900 |
| C | -1.15233600 | 2.44087200  | 0.37716000  |
| H | -2.03948900 | 2.68082700  | -0.22424900 |
| H | -1.42341300 | 2.64522400  | 1.42223400  |

#### Allene 12 M062X/6-31G\*

|   |             |             |             |
|---|-------------|-------------|-------------|
| 0 | 1           |             |             |
| C | 1.58724600  | 0.01558000  | -0.31117000 |
| C | 1.27281700  | -1.32472800 | 0.14353500  |
| C | 0.04296300  | -1.84266600 | -0.00374100 |
| C | 0.68619200  | 1.05426400  | -0.21397600 |
| C | -1.20304100 | -1.37071100 | -0.14533700 |
| C | -0.70547400 | 1.02761400  | 0.21189800  |
| C | -1.56090400 | -0.03696400 | 0.30898100  |
| C | 2.56466900  | -1.96119000 | 0.62218800  |
| H | 2.68684100  | -2.96964100 | 0.21606200  |
| C | 3.60544200  | -0.99043400 | 0.11230100  |
| H | 4.67084400  | -1.15633500 | 0.22965200  |
| C | 3.04839700  | 0.10211300  | -0.43531400 |
| C | -3.02483500 | -0.00010300 | 0.44227100  |
| C | -2.47553800 | -2.04161600 | -0.62970600 |
| H | -2.52570800 | -2.11836600 | -1.72570700 |
| C | -3.54573900 | -1.10764700 | -0.11005100 |
| H | -4.60552000 | -1.31008700 | -0.22242300 |
| H | -2.56905000 | -3.05750700 | -0.23445200 |
| H | 2.61646500  | -2.04846200 | 1.71741200  |
| H | 3.59140300  | 0.95239500  | -0.83296700 |
| H | -3.59044100 | 0.82960400  | 0.85252200  |
| C | 1.04370600  | 2.46978800  | -0.38926300 |
| H | 2.01859000  | 2.79844600  | -0.73141300 |
| C | 0.02286800  | 3.27003600  | -0.05751400 |
| H | 0.02761600  | 4.35330900  | -0.09223400 |
| C | -1.16463500 | 2.46446500  | 0.38745500  |
| H | -2.06119400 | 2.68623500  | -0.20660800 |
| H | -1.42465300 | 2.67360700  | 1.43481700  |

#### Allene 13 M062X/6-31G\*

0 1

|   |             |             |             |
|---|-------------|-------------|-------------|
| C | 0.47868300  | 2.27155100  | 0.54350400  |
| C | 1.23496600  | 1.23965400  | 0.99974400  |
| C | 1.20306700  | -0.06423800 | 0.34230500  |
| C | -0.47874500 | 2.27156500  | -0.54343800 |
| C | 0.00001700  | -0.54705800 | -0.00006500 |
| C | -1.23500100 | 1.23967300  | -0.99973300 |
| C | -1.20306800 | -0.06424100 | -0.34233000 |
| H | 0.63961600  | 3.24233500  | 1.00905500  |
| H | 1.93543100  | 1.42157900  | 1.81528400  |
| H | -0.63969300 | 3.24236400  | -1.00895100 |
| H | -1.93544900 | 1.42161200  | -1.81528400 |
| N | 2.40668000  | -0.75928600 | 0.17545800  |
| N | -2.40664500 | -0.75930400 | -0.17541800 |
| C | 3.59984400  | 0.00341100  | -0.14790300 |
| H | 4.48486500  | -0.59416900 | 0.09071200  |
| H | 3.64241700  | 0.27386000  | -1.21565000 |
| H | 3.64093400  | 0.92194600  | 0.43773000  |
| C | 2.31211300  | -2.00326200 | -0.56060100 |
| H | 3.25042200  | -2.55439000 | -0.44741500 |
| H | 1.48575300  | -2.59271200 | -0.15653500 |
| H | 2.12310100  | -1.84462500 | -1.63416200 |
| C | -3.59987200 | 0.00333400  | 0.14782900  |
| H | -3.64094500 | 0.92187000  | -0.43780200 |
| H | -4.48484600 | -0.59428300 | -0.09087100 |
| H | -3.64255800 | 0.27377500  | 1.21557200  |
| C | -2.31204600 | -2.00327100 | 0.56065000  |
| H | -3.25033300 | -2.55443400 | 0.44745300  |
| H | -1.48565500 | -2.59268900 | 0.15660000  |
| H | -2.12305800 | -1.84461700 | 1.63421200  |

**Allene 14 M062X/6-31G\***

0 1

|   |             |             |             |
|---|-------------|-------------|-------------|
| C | 0.32661300  | 1.61268700  | -0.31657000 |
| C | 1.39953100  | 0.74466200  | -0.39808500 |
| C | 1.38155600  | -0.57385700 | 0.21050800  |
| C | -0.96175400 | 1.38099800  | 0.27694600  |
| C | 0.23335600  | -1.27024600 | 0.14404100  |
| C | -1.60958600 | 0.18659800  | 0.48955400  |
| C | -1.07998400 | -1.06942800 | -0.02466300 |
| C | 2.58806100  | 1.49353400  | -0.94540400 |
| H | 3.41134200  | 1.48423200  | -0.21681800 |
| C | 2.05514800  | 2.87732900  | -1.17910600 |
| H | 2.64164300  | 3.68703100  | -1.59637700 |
| C | 0.76776800  | 2.93094300  | -0.80862100 |
| H | 0.12298000  | 3.80199700  | -0.86030500 |
| C | -1.84724800 | 2.49138400  | 0.79527600  |
| H | -1.33745800 | 3.10557200  | 1.54971900  |
| H | -2.14422400 | 3.17522100  | -0.01279600 |
| C | -2.88427500 | 0.44122300  | 1.17379400  |
| H | -3.57290600 | -0.34277600 | 1.46964500  |



|   |             |             |             |
|---|-------------|-------------|-------------|
| C | -3.03449300 | 1.76296200  | 1.35885100  |
| H | -3.87165800 | 2.25838200  | 1.83580800  |
| H | 2.97707500  | 1.04513000  | -1.86987400 |
| N | 2.53924000  | -1.00825500 | 0.91966100  |
| N | -1.95126400 | -1.99362300 | -0.61330200 |
| C | 3.58708200  | -1.49509300 | 0.02855000  |
| H | 4.49123600  | -1.70081300 | 0.60992700  |
| H | 3.28026800  | -2.41971100 | -0.49052300 |
| H | 3.83052300  | -0.74566200 | -0.72702200 |
| C | 2.22105700  | -2.01459500 | 1.91744300  |
| H | 1.80959800  | -2.93288900 | 1.46439400  |
| H | 3.13056700  | -2.26444300 | 2.47132700  |
| H | 1.47853200  | -1.61791000 | 2.61326800  |
| C | -1.32293900 | -3.18813900 | -1.14289900 |
| H | -0.63551500 | -3.58913900 | -0.39459400 |
| H | -2.09879500 | -3.92574500 | -1.36869100 |
| H | -0.74776300 | -2.98983400 | -2.06130800 |
| C | -2.99509700 | -1.47429600 | -1.48348000 |
| H | -2.60211500 | -1.19179900 | -2.47355100 |
| H | -3.75842500 | -2.24542800 | -1.62393300 |
| H | -3.46950700 | -0.59826100 | -1.03960700 |

**Allene 15 M062X/6-31G\***

0 1

|   |             |             |             |
|---|-------------|-------------|-------------|
| C | 1.59546500  | 0.08194500  | -0.29040300 |
| C | 1.19677000  | -1.26057600 | 0.13378500  |
| C | -0.02133900 | -1.79138300 | -0.12241300 |
| C | 0.71915600  | 1.14262400  | -0.29835600 |
| C | -1.23666900 | -1.24411200 | -0.35753200 |
| C | -0.70859400 | 1.15537700  | 0.01140500  |
| C | -1.59326200 | 0.09675500  | 0.10140800  |
| C | 2.37617700  | -1.88892000 | 0.69325600  |
| H | 2.36506900  | -2.87600400 | 1.13744700  |
| C | 3.47689800  | -1.12132800 | 0.44856600  |
| C | 3.06843600  | 0.11176100  | -0.27302900 |
| C | -3.05859000 | 0.13534800  | 0.19536900  |
| C | -2.45191900 | -1.83824600 | -0.87960400 |
| C | -3.52542100 | -1.06173200 | -0.55030800 |
| C | -1.10772300 | 2.57236900  | 0.07721000  |
| H | -2.12269900 | 2.89956400  | 0.25525900  |
| C | -0.07444100 | 3.38068200  | -0.17948900 |
| H | -0.10929200 | 4.46325600  | -0.21922100 |
| C | 1.15964500  | 2.58514500  | -0.47489700 |
| H | 2.00621700  | 2.83725400  | 0.17758700  |
| H | 1.49050200  | 2.77887700  | -1.50495800 |
| C | 3.85806200  | 1.05984100  | -0.84993300 |
| H | 3.35194800  | 1.83462600  | -1.41873500 |
| C | 5.28199000  | 1.17264800  | -0.84011000 |
| C | 6.22584900  | 0.36221400  | -0.25014800 |
| C | 4.83537200  | -1.47275400 | 0.80942500  |
| C | 6.01372000  | -0.83543100 | 0.50921100  |

|   |             |             |             |
|---|-------------|-------------|-------------|
| H | -2.48543900 | -2.81276500 | -1.34985800 |
| C | -4.90755500 | -1.37110500 | -0.85078100 |
| C | -6.05518400 | -0.75270200 | -0.41874400 |
| C | -3.79136600 | 1.02363500  | 0.92380200  |
| H | -3.22814500 | 1.73884100  | 1.52000900  |
| C | -5.20939300 | 1.12618000  | 1.04772500  |
| C | -6.20074100 | 0.36780700  | 0.46346100  |
| C | -5.28844100 | -2.48512900 | -1.73214100 |
| H | -4.57384700 | -3.13479500 | -2.22308800 |
| C | -6.62430600 | -2.55198200 | -1.83747200 |
| H | -7.19141700 | -3.26517200 | -2.42316800 |
| C | -7.50122500 | 0.89605700  | 0.90007600  |
| H | -8.45548900 | 0.48618000  | 0.58707700  |
| C | -7.32158700 | 1.93795700  | 1.72837000  |
| H | -8.09776700 | 2.52163200  | 2.20796000  |
| C | 5.14953000  | -2.66397900 | 1.61300900  |
| H | 4.40153800  | -3.34701700 | 1.99694000  |
| C | 6.47516200  | -2.75823200 | 1.79741700  |
| H | 6.99665500  | -3.53013900 | 2.35008400  |
| C | 7.55498800  | 0.92663200  | -0.52517100 |
| H | 8.48240500  | 0.48685800  | -0.17434700 |
| C | 7.43811200  | 2.04348700  | -1.26194000 |
| H | 8.24725500  | 2.67025100  | -1.61630300 |
| C | 7.15688400  | -1.61325300 | 1.11442400  |
| H | 7.86365200  | -1.95815500 | 0.34616200  |
| H | 7.73820300  | -1.00111400 | 1.81862600  |
| C | 5.98954600  | 2.30937400  | -1.53596800 |
| H | 5.66949700  | 3.28577600  | -1.14539700 |
| H | 5.77125800  | 2.32077500  | -2.61336400 |
| C | -5.85502500 | 2.18584700  | 1.90609800  |
| H | -5.54776100 | 2.09463600  | 2.95771900  |
| H | -5.56742100 | 3.19774500  | 1.58724200  |
| C | -7.24516900 | -1.46695500 | -1.01251400 |
| H | -7.90347100 | -1.87482200 | -0.23226900 |
| H | -7.86432800 | -0.79150300 | -1.61978200 |

**Allene 16 M062X/6-31G\***

|     |             |             |             |
|-----|-------------|-------------|-------------|
| 0 1 |             |             |             |
| C   | -1.58529300 | 0.24871600  | 0.35028400  |
| C   | -1.27050100 | -1.15168600 | -0.08644000 |
| C   | 0.00989800  | -1.47917500 | -0.09203500 |
| C   | -0.65437900 | 1.32525100  | 0.17371000  |
| C   | 1.28713500  | -1.13658300 | -0.06607500 |
| C   | 0.66053300  | 1.34341600  | -0.28432600 |
| C   | 1.61596200  | 0.27320400  | -0.44189500 |
| C   | -2.50747000 | -1.84873700 | -0.40683000 |
| H   | -2.56724000 | -2.88120600 | -0.72393000 |
| C   | -3.50876000 | -0.99443300 | -0.04737500 |
| C   | -2.96819700 | 0.29626500  | 0.36986200  |
| C   | 2.99781100  | 0.32562400  | -0.39196700 |
| C   | 2.51189700  | -1.85061000 | 0.26935300  |

|   |             |             |             |
|---|-------------|-------------|-------------|
| H | 2.55778400  | -2.89465400 | 0.54926400  |
| C | 3.52519100  | -0.98555400 | -0.01440400 |
| C | 1.05039200  | 2.75088600  | -0.47233800 |
| H | 2.02022200  | 3.05369100  | -0.84833500 |
| C | 0.04745500  | 3.57068500  | -0.12993900 |
| H | 0.05644900  | 4.65316300  | -0.16160800 |
| C | -1.12919900 | 2.75389800  | 0.31068000  |
| H | -2.01046800 | 2.93886700  | -0.31957600 |
| H | -1.42975200 | 2.97822300  | 1.34390400  |
| C | -4.07701700 | 1.19331400  | 0.53225200  |
| H | -4.02556200 | 2.23321900  | 0.83247400  |
| C | 4.11543700  | 1.22756900  | -0.44476300 |
| H | 4.08536300  | 2.28606100  | -0.67129200 |
| C | 5.27865700  | 0.53506400  | -0.20250600 |
| C | 4.97900400  | -0.89506500 | 0.06407300  |
| C | -4.96503700 | -0.89909100 | -0.05556600 |
| C | -5.25215400 | 0.51375300  | 0.30746600  |
| C | 5.82022200  | -1.92186800 | 0.33465300  |
| H | 5.35462200  | -2.89367500 | 0.48837600  |
| C | 6.59178100  | 1.12222400  | -0.21176400 |
| H | 6.60584900  | 2.19019700  | -0.42387600 |
| C | -5.81961700 | -1.90906000 | -0.34742000 |
| H | -5.36278300 | -2.86984600 | -0.57827000 |
| C | -6.56272100 | 1.09385600  | 0.42106000  |
| H | -6.56607700 | 2.14588800  | 0.70242700  |
| C | 7.25549600  | -1.89943100 | 0.44776700  |
| H | 7.71270300  | -2.85928100 | 0.67479100  |
| C | 8.09878700  | -0.84555600 | 0.30856300  |
| H | 9.15736800  | -1.05747800 | 0.43868700  |
| C | 7.79317400  | 0.53260700  | 0.00846800  |
| H | 8.66037500  | 1.18600300  | -0.04690700 |
| C | -7.25866900 | -1.88177700 | -0.39495700 |
| H | -7.72670300 | -2.82577800 | -0.66267800 |
| C | -8.09359900 | -0.84052100 | -0.15031500 |
| H | -9.15719500 | -1.04616900 | -0.24546500 |
| C | -7.77414200 | 0.51631300  | 0.22372700  |
| H | -8.63740900 | 1.16179700  | 0.36600100  |

### Allene 17 M062X/6-31G\*

|     |             |             |             |
|-----|-------------|-------------|-------------|
| 0 1 |             |             |             |
| C   | 1.58041300  | -0.70689400 | 0.36933400  |
| C   | 1.27053900  | 0.69293000  | -0.06140900 |
| C   | -0.00862300 | 1.02880700  | -0.08095700 |
| C   | 0.65344400  | -1.78193800 | 0.16852500  |
| C   | -1.28414200 | 0.67490400  | -0.07599900 |
| C   | -0.65354500 | -1.79689200 | -0.31373300 |
| C   | -1.60634600 | -0.72571800 | -0.47823400 |
| C   | 2.51316800  | 1.39453600  | -0.35633400 |
| H   | 2.56716900  | 2.43168300  | -0.65605000 |
| C   | 3.51378900  | 0.53864900  | 0.01065700  |
| C   | 2.96355200  | -0.75586100 | 0.41516000  |

|   |              |             |             |
|---|--------------|-------------|-------------|
| C | -2.99002700  | -0.77937300 | -0.46558500 |
| C | -2.51662300  | 1.38633500  | 0.24315200  |
| H | -2.55792400  | 2.42857200  | 0.52723300  |
| C | -3.52845600  | 0.52712000  | -0.07345400 |
| C | -1.03798100  | -3.20318100 | -0.52032800 |
| H | -2.00174200  | -3.50368600 | -0.91346500 |
| C | -0.04017200  | -4.02531500 | -0.16807300 |
| H | -0.04807500  | -5.10756100 | -0.20886100 |
| C | 1.12709800   | -3.21135400 | 0.30177300  |
| H | 2.02226100   | -3.38840000 | -0.31113600 |
| H | 1.40719400   | -3.44431000 | 1.33892100  |
| C | 4.06360900   | -1.65274400 | 0.60366100  |
| H | 4.00453600   | -2.69171700 | 0.90518400  |
| C | -4.10140200  | -1.67722800 | -0.57912200 |
| H | -4.06498400  | -2.72836300 | -0.83646400 |
| C | -5.27431400  | -0.98798000 | -0.35803700 |
| C | -4.98266700  | 0.42946300  | -0.03850000 |
| C | 4.96824900   | 0.43602800  | 0.03151600  |
| C | 5.24662000   | -0.97208900 | 0.40620000  |
| C | -5.83902400  | 1.44056000  | 0.24875600  |
| C | -6.58149800  | -1.57784200 | -0.43151200 |
| H | -6.58456900  | -2.64075600 | -0.67568800 |
| C | 5.83680800   | 1.43678800  | -0.25605100 |
| C | 6.54892300   | -1.55813600 | 0.55031800  |
| H | 6.54145400   | -2.61208900 | 0.83091800  |
| C | -7.29318700  | 1.43223400  | 0.30309300  |
| C | -8.13683000  | 0.37634100  | 0.09290000  |
| C | -7.79251500  | -1.00148000 | -0.23910200 |
| C | 7.29204000   | 1.42505100  | -0.25928300 |
| C | 8.12539400   | 0.37625600  | 0.01709000  |
| C | 7.76751100   | -0.98923400 | 0.38389900  |
| C | -9.59948400  | 0.44010100  | 0.17130800  |
| H | -10.14965800 | 1.34452800  | 0.40275400  |
| C | -10.14608300 | -0.75820000 | -0.07628000 |
| H | -11.20721900 | -0.97961100 | -0.07826000 |
| C | 7.72299000   | 2.77995900  | -0.62027100 |
| H | 8.76118800   | 3.08063700  | -0.69800700 |
| C | 6.66675000   | 3.57660100  | -0.83406400 |
| H | 6.71053000   | 4.62281500  | -1.11396200 |
| C | 9.58999300   | 0.43676900  | -0.01126200 |
| H | 10.14967000  | 1.33217600  | -0.25464500 |
| C | 10.12553600  | -0.75241400 | 0.29773300  |
| H | 11.18563900  | -0.97378800 | 0.34511300  |
| C | -9.08871600  | -1.78767800 | -0.35623800 |
| H | -9.20274500  | -2.23349800 | -1.35318300 |
| H | -9.12430000  | -2.61709700 | 0.36280200  |
| C | 9.05734700   | -1.77097300 | 0.57620000  |
| H | 9.11783400   | -2.62601900 | -0.11045200 |
| H | 9.13529100   | -2.18065300 | 1.59209200  |
| C | 5.37754100   | 2.82722700  | -0.64283700 |
| H | 4.73864400   | 3.26956900  | 0.13523500  |
| H | 4.77269900   | 2.80336400  | -1.56091700 |

|   |             |            |             |
|---|-------------|------------|-------------|
| C | -5.36494200 | 2.84138600 | 0.57576500  |
| H | -4.73295000 | 2.84564200 | 1.47555100  |
| H | -4.74971500 | 3.25692900 | -0.23536600 |
| C | -7.70994300 | 2.79953500 | 0.63292100  |
| H | -8.74443000 | 3.10517400 | 0.73611600  |
| C | -6.64596000 | 3.60016800 | 0.78401300  |
| H | -6.67879300 | 4.65509900 | 1.03068700  |

**Allene 18 M062X/6-31G\***

0 1

|   |             |             |             |
|---|-------------|-------------|-------------|
| C | -1.56743100 | -0.83664500 | -0.44328000 |
| C | -1.26626000 | 0.55082800  | 0.04262900  |
| C | 0.01173700  | 0.88972400  | 0.09101800  |
| C | -0.64354400 | -1.91154600 | -0.26324300 |
| C | 1.28534200  | 0.52256700  | 0.09880700  |
| C | 0.65258500  | -1.95226000 | 0.25341000  |
| C | 1.59800200  | -0.88554500 | 0.46523000  |
| C | -2.51689300 | 1.23431800  | 0.34541800  |
| H | -2.57950400 | 2.26000500  | 0.68057800  |
| C | -3.50941400 | 0.38942600  | -0.07254900 |
| C | -2.95059000 | -0.88460000 | -0.52499800 |
| C | 2.98403700  | -0.94681200 | 0.47059500  |
| C | 2.52728300  | 1.23890000  | -0.17837600 |
| H | 2.57444700  | 2.29003000  | -0.42852400 |
| C | 3.53407100  | 0.37013400  | 0.12800300  |
| C | 1.02749600  | -3.35141300 | 0.46806200  |
| H | 1.97145400  | -3.65602100 | 0.89859400  |
| C | 0.02472400  | -4.16983200 | 0.06853400  |
| C | -1.13091200 | -3.33392900 | -0.41672200 |
| H | -2.03618600 | -3.49776100 | 0.18524100  |
| H | -1.39075800 | -3.57172700 | -1.45754800 |
| C | -4.04572100 | -1.77182000 | -0.77844500 |
| H | -3.97871800 | -2.79471700 | -1.13064200 |
| C | 4.08575600  | -1.85288700 | 0.56484900  |
| H | 4.03931200  | -2.91278700 | 0.78132200  |
| C | 5.26816500  | -1.16108600 | 0.38054500  |
| C | 4.98877700  | 0.26394000  | 0.10855400  |
| C | -4.96379800 | 0.28301000  | -0.12288700 |
| C | -5.23469500 | -1.10269900 | -0.57062200 |
| C | 5.85781900  | 1.27729500  | -0.13431700 |
| C | 6.57148400  | -1.75320200 | 0.44865900  |
| H | 6.57395600  | -2.82320700 | 0.66001200  |
| C | -5.84108400 | 1.26479100  | 0.20293100  |
| C | -6.53620900 | -1.67305100 | -0.76626200 |
| H | -6.53061100 | -2.71152500 | -1.10065400 |
| C | 7.30843000  | 1.28066700  | -0.18388400 |
| C | 8.15049600  | 0.21017500  | -0.00248900 |
| C | 7.78387400  | -1.16828200 | 0.28383600  |
| C | -7.29446300 | 1.27046900  | 0.18939800  |
| C | -8.12774600 | 0.23664700  | -0.15677700 |
| C | -7.75303200 | -1.10376300 | -0.59112000 |

|   |              |             |             |
|---|--------------|-------------|-------------|
| C | 9.60362600   | 0.27218100  | -0.06474200 |
| H | 10.15583700  | 1.18274800  | -0.25548400 |
| C | 10.14976300  | -0.95344400 | 0.14039500  |
| C | -7.72516800  | 2.59909400  | 0.60555100  |
| H | -8.76215900  | 2.90051900  | 0.67255100  |
| C | -6.65616800  | 3.38554600  | 0.88854400  |
| C | -9.58196300  | 0.29736200  | -0.14035100 |
| H | -10.14061300 | 1.17519000  | 0.15621000  |
| C | -10.12167000 | -0.88162900 | -0.54163600 |
| C | 9.06778600   | -1.97184600 | 0.39949300  |
| H | 9.16129400   | -2.42413300 | 1.39565000  |
| H | 9.10640700   | -2.79099500 | -0.33087100 |
| C | -9.03359900  | -1.88139500 | -0.84439100 |
| H | -9.09660100  | -2.76356400 | -0.19310500 |
| H | -9.09873900  | -2.24196100 | -1.87979700 |
| C | -5.37141600  | 2.62838700  | 0.65842300  |
| H | -4.72953100  | 3.09554200  | -0.10253200 |
| H | -4.77165100  | 2.56142300  | 1.57784900  |
| C | 5.37663400   | 2.68178300  | -0.42374700 |
| H | 4.75912000   | 2.69961400  | -1.33327000 |
| H | 4.75156200   | 3.07435000  | 0.39109200  |
| C | 7.73013500   | 2.64438800  | -0.47342500 |
| H | 8.76442500   | 2.94454000  | -0.57526000 |
| C | 6.65498400   | 3.46510900  | -0.59222000 |
| N | 0.00802600   | -5.55002900 | 0.01635000  |
| C | 1.12408700   | -6.21345100 | 0.65422200  |
| H | 2.05846200   | -5.84257300 | 0.22306000  |
| H | 1.15144800   | -6.03781000 | 1.74216500  |
| H | 1.05954300   | -7.28848100 | 0.46923900  |
| C | -1.27430000  | -6.21212700 | 0.16424500  |
| H | -1.68094800  | -6.13518900 | 1.18570100  |
| H | -1.99904700  | -5.78098600 | -0.52991300 |
| H | -1.15813900  | -7.27049700 | -0.08415200 |
| N | -11.45045400 | -1.18414300 | -0.73078600 |
| N | -6.65457300  | 4.66903800  | 1.38593800  |
| N | 6.64449500   | 4.82654800  | -0.78047700 |
| N | 11.47529600  | -1.31235900 | 0.07317000  |
| C | 7.92338600   | 5.44922900  | -1.04657900 |
| H | 7.79835400   | 6.53412300  | -1.06857300 |
| H | 8.62356200   | 5.19732100  | -0.24487800 |
| H | 8.35733500   | 5.11956000  | -2.00388000 |
| C | 5.50149000   | 5.43299500  | -1.43801700 |
| H | 4.57408500   | 5.04071000  | -1.01666500 |
| H | 5.52114000   | 6.51152900  | -1.26137100 |
| H | 5.49411600   | 5.25782600  | -2.52522300 |
| C | -12.40475700 | -0.19088000 | -0.28646300 |
| H | -12.18143300 | 0.76747200  | -0.76383500 |
| H | -13.40976300 | -0.49848400 | -0.58390700 |
| H | -12.38259200 | -0.04873900 | 0.80574300  |
| C | -11.87563100 | -2.56498300 | -0.59449800 |
| H | -12.87733800 | -2.67152300 | -1.01878000 |
| H | -11.20456400 | -3.22121800 | -1.15193700 |

|   |              |             |             |
|---|--------------|-------------|-------------|
| H | -11.90431500 | -2.90099400 | 0.45404300  |
| C | -5.52598800  | 5.52919500  | 1.08101000  |
| H | -5.55771900  | 6.40255100  | 1.73749100  |
| H | -4.58948000  | 5.00112200  | 1.27098300  |
| H | -5.52561100  | 5.87841200  | 0.03640200  |
| C | -7.94060900  | 5.32765400  | 1.46076700  |
| H | -8.62804600  | 4.71413700  | 2.05029000  |
| H | -7.82334500  | 6.29252700  | 1.95936600  |
| H | -8.38647300  | 5.49126700  | 0.46661900  |
| C | 12.42879200  | -0.23303300 | -0.07072300 |
| H | 12.16642200  | 0.36852200  | -0.94546500 |
| H | 12.45064900  | 0.42624000  | 0.81140500  |
| H | 13.42556900  | -0.65220800 | -0.22492200 |
| C | 11.93099700  | -2.45209400 | 0.84757500  |
| H | 12.01936500  | -2.22825700 | 1.92236000  |
| H | 11.24317400  | -3.29035300 | 0.72229100  |
| H | 12.91114900  | -2.76430000 | 0.47791500  |

**Allene 19 M062X/6-31G\***

0 1

|   |             |             |             |
|---|-------------|-------------|-------------|
| C | -1.59012600 | 0.84949600  | 0.75380600  |
| C | -1.22580300 | -0.52092100 | 0.33776000  |
| C | 0.04377300  | -0.92602700 | 0.40005400  |
| C | -0.76045200 | 1.91331400  | 0.56684900  |
| C | 1.27533600  | -0.41123000 | 0.44316100  |
| C | 0.62546300  | 1.95944400  | 0.07889000  |
| C | 1.53941700  | 0.94785500  | -0.06712500 |
| C | -2.46450600 | -1.22002100 | -0.03303200 |
| H | -2.47454100 | -2.22126000 | -0.44747000 |
| C | -3.52070300 | -0.44736400 | 0.33064400  |
| C | -3.04156200 | 0.84256600  | 0.86585400  |
| C | 2.98639000  | 1.02343400  | -0.21887700 |
| C | 2.56215100  | -1.00579300 | 0.83363400  |
| H | 2.64365000  | -1.97732400 | 1.30637500  |
| C | 3.55796500  | -0.19798900 | 0.38840200  |
| C | 0.93668300  | 3.37722100  | -0.14038600 |
| H | 1.89469800  | 3.71663600  | -0.51527700 |
| C | -0.09548300 | 4.15872400  | 0.20165600  |
| H | -0.11612600 | 5.24081100  | 0.14246500  |
| C | -1.25007100 | 3.33944800  | 0.70481000  |
| H | -2.17349800 | 3.49896300  | 0.12894300  |
| H | -1.49219500 | 3.57751200  | 1.74988900  |
| C | -4.12402600 | 1.60683800  | 1.14859200  |
| H | -4.14945900 | 2.60918300  | 1.56179100  |
| C | 4.01706700  | 1.81445800  | -0.60381500 |
| H | 3.97912800  | 2.78077500  | -1.09402300 |
| C | 5.27855100  | 1.12827300  | -0.28359000 |
| C | 5.00795500  | -0.09815600 | 0.31416100  |
| C | -4.97574300 | -0.41471200 | 0.32917700  |
| C | -5.33464400 | 0.83256400  | 0.82903800  |
| C | 5.95132800  | -1.03512200 | 0.85101200  |

|   |              |             |             |
|---|--------------|-------------|-------------|
| C | 6.55476200   | 1.71643800  | -0.58382600 |
| H | 6.51715000   | 2.72395600  | -0.99608900 |
| C | -5.84519800  | -1.49807100 | -0.02716000 |
| C | -6.65207900  | 1.36389200  | 1.04734300  |
| H | -6.68606700  | 2.34601700  | 1.51730900  |
| C | 7.31802700   | -1.07035800 | 0.72212400  |
| C | 8.17575400   | -0.19123100 | -0.06962700 |
| C | 7.78206600   | 1.14743500  | -0.48730600 |
| C | -7.21165300  | -1.51580400 | -0.15973600 |
| C | -8.14673600  | -0.39800800 | -0.04735000 |
| C | -7.84194100  | 0.83148400  | 0.67308000  |
| C | 9.47677300   | -0.44426900 | -0.46421700 |
| C | 10.09216200  | 0.76788000  | -0.99642600 |
| C | -7.62791200  | -2.91405400 | -0.37042000 |
| H | -8.66125600  | -3.23312500 | -0.43318300 |
| C | -6.55370300  | -3.71701800 | -0.42506700 |
| H | -6.55493100  | -4.79037700 | -0.56755800 |
| C | -9.44688100  | -0.35971000 | -0.51619600 |
| C | -10.14711700 | 0.80412200  | 0.01898200  |
| C | 9.03418400   | 1.84961900  | -0.96185500 |
| H | 8.89350600   | 2.32246600  | -1.93952600 |
| H | 9.32386500   | 2.64121100  | -0.25840300 |
| C | -9.14831000  | 1.56951000  | 0.86023000  |
| H | -9.07344000  | 2.62019500  | 0.56052200  |
| H | -9.45164600  | 1.55518800  | 1.91524200  |
| C | -5.31656600  | -2.89517200 | -0.23708000 |
| H | -4.71533500  | -3.23071200 | 0.61886900  |
| H | -4.65934900  | -2.93759300 | -1.11784800 |
| C | 5.51932800   | -2.15470500 | 1.76528800  |
| H | 4.93132500   | -1.77905600 | 2.61370100  |
| H | 4.87834800   | -2.87142600 | 1.23131700  |
| C | 7.82852200   | -2.13879200 | 1.59955800  |
| H | 8.88154900   | -2.34160600 | 1.75312600  |
| C | 6.81079700   | -2.77605000 | 2.19914000  |
| H | 6.88487200   | -3.59818600 | 2.89986500  |
| C | 10.10426900  | -1.75624300 | -0.49833800 |
| H | 9.42984000   | -2.58852100 | -0.31408500 |
| C | -10.00508600 | -1.25344600 | -1.51877900 |
| H | -9.28149300  | -1.90340300 | -2.00403200 |
| C | -11.27306400 | -1.33873900 | -1.97546500 |
| H | -11.44378900 | -2.07432300 | -2.75841900 |
| C | -12.45326600 | -0.58380500 | -1.58918400 |
| H | -13.38564800 | -0.92893400 | -2.02883200 |
| C | 11.38014700  | -2.08473300 | -0.79383900 |
| H | 11.60834800  | -3.14832300 | -0.78398500 |
| C | 12.50406700  | -1.23075300 | -1.13952600 |
| H | 13.46228300  | -1.73819200 | -1.21740100 |
| C | 11.35971400  | 1.00243100  | -1.40085600 |
| H | 11.58133500  | 2.01674400  | -1.72820000 |
| C | 12.48706400  | 0.09076100  | -1.41333900 |
| H | 13.43723300  | 0.54488200  | -1.68622900 |
| C | -11.44015100 | 1.17854800  | -0.09532200 |



|   |              |            |             |
|---|--------------|------------|-------------|
| H | -11.72774800 | 2.08442300 | 0.43544900  |
| C | -12.51705200 | 0.50489200 | -0.79402900 |
| H | -13.49990000 | 0.94929300 | -0.65316700 |

PROTONATED

**Allene 1H M062X/6-31G\***

|     |             |             |            |
|-----|-------------|-------------|------------|
| 1 1 |             |             |            |
| C   | -1.44898200 | -0.69769600 | 0.00000000 |
| C   | -1.44898200 | 0.69769600  | 0.00000000 |
| C   | -0.35792500 | 1.56785500  | 0.00000000 |
| C   | -0.35792500 | -1.56785500 | 0.00000000 |
| C   | 1.00280100  | 1.25733300  | 0.00000000 |
| C   | 1.00280100  | -1.25733300 | 0.00000000 |
| C   | 1.60843200  | 0.00000000  | 0.00000000 |
| H   | -2.42876800 | -1.16944100 | 0.00000000 |
| H   | -2.42876800 | 1.16944100  | 0.00000000 |
| H   | -0.60008200 | 2.62780900  | 0.00000000 |
| H   | -0.60008200 | -2.62780900 | 0.00000000 |
| H   | 1.68033300  | 2.10761800  | 0.00000000 |
| H   | 1.68033300  | -2.10761800 | 0.00000000 |
| H   | 2.69571500  | 0.00000000  | 0.00000000 |

**Allene 2H M062X/6-31G\***

|     |             |             |             |
|-----|-------------|-------------|-------------|
| 1 1 |             |             |             |
| C   | -0.50165500 | -0.69320400 | -0.00002000 |
| C   | -0.49522900 | 0.73067100  | -0.00000100 |
| C   | 0.61374600  | 1.59031800  | -0.00002000 |
| C   | 0.56611200  | -1.57075200 | -0.00004100 |
| C   | 1.95710500  | 1.24976300  | 0.00000100  |
| C   | 1.93644400  | -1.26835600 | -0.00000100 |
| C   | 2.54875700  | -0.02360800 | 0.00002900  |
| H   | 0.38749700  | 2.65433200  | -0.00004800 |
| H   | 0.31475800  | -2.62992900 | -0.00006300 |
| H   | 2.65221700  | 2.08567300  | -0.00000400 |
| H   | 2.60460500  | -2.12554500 | 0.00000700  |
| H   | 3.63559700  | -0.03247400 | 0.00006500  |
| C   | -1.87177900 | 1.19362900  | 0.00001600  |
| H   | -2.15463300 | 2.23959500  | 0.00003200  |
| C   | -2.70494500 | 0.13341000  | 0.00000500  |
| H   | -3.78795600 | 0.17734300  | 0.00002900  |
| C   | -1.93682000 | -1.14762200 | 0.00001900  |
| H   | -2.16126300 | -1.76724600 | -0.87960800 |
| H   | -2.16123700 | -1.76723600 | 0.87966000  |

**Allene 3H M062X/6-31G\***

|     |            |             |             |
|-----|------------|-------------|-------------|
| 1 1 |            |             |             |
| C   | 0.66362700 | -0.14054100 | -0.00001800 |

|   |             |             |             |
|---|-------------|-------------|-------------|
| C | 1.39748600  | 1.08085600  | -0.00003600 |
| C | 2.78764100  | 1.26259100  | -0.00001800 |
| C | 1.15275000  | -1.43337600 | 0.00000900  |
| C | 2.48720800  | -1.86457500 | 0.00002200  |
| C | 3.64685500  | -1.10302300 | 0.00002100  |
| H | 3.12753900  | 2.29586100  | -0.00002700 |
| H | 0.40640000  | -2.22609300 | 0.00001900  |
| H | 2.63009400  | -2.94199700 | 0.00003700  |
| H | 4.57907900  | -1.66136900 | 0.00003500  |
| C | 0.44631200  | 2.17559700  | -0.00007100 |
| H | 0.73181200  | 3.22083200  | -0.00009100 |
| C | -0.80549700 | 1.67743000  | -0.00007400 |
| H | -1.71105500 | 2.27405000  | -0.00010100 |
| C | -0.81614600 | 0.17594400  | -0.00002800 |
| C | -1.51546300 | -0.38973800 | 1.27065800  |
| H | -1.04211200 | 0.03027200  | 2.16464900  |
| H | -1.35372500 | -1.47521700 | 1.29402500  |
| C | -1.51550900 | -0.38984400 | -1.27063300 |
| H | -1.04219600 | 0.03008900  | -2.16467900 |
| H | -1.35377200 | -1.47532500 | -1.29391600 |
| C | -3.02086200 | -0.11409600 | 1.26118900  |
| H | -3.46370400 | -0.56167400 | 2.15615400  |
| H | -3.20533400 | 0.96554000  | 1.33262900  |
| C | -3.02090900 | -0.11420400 | -1.26113100 |
| H | -3.46378400 | -0.56185900 | -2.15604000 |
| H | -3.20538500 | 0.96542500  | -1.33265700 |
| C | -3.68105300 | -0.67222700 | 0.00006500  |
| H | -3.59277300 | -1.76718600 | 0.00011100  |
| H | -4.75010400 | -0.44175700 | 0.00007500  |
| C | 3.77845900  | 0.29331100  | 0.00000600  |
| H | 4.79961800  | 0.66576800  | 0.00001300  |

**Allene 4H M062X/6-31G\***

|     |             |             |             |
|-----|-------------|-------------|-------------|
| 1 1 |             |             |             |
| C   | -0.50166100 | -0.69321000 | 0.00000200  |
| C   | -0.49522600 | 0.73066600  | 0.00000100  |
| C   | 0.61375000  | 1.59031500  | -0.00000100 |
| C   | 0.56611100  | -1.57075200 | 0.00000100  |
| C   | 1.95710800  | 1.24976400  | -0.00000200 |
| C   | 1.93644200  | -1.26835700 | 0.00000000  |
| C   | 2.54875700  | -0.02361000 | -0.00000200 |
| H   | 2.65222300  | 2.08567200  | -0.00000300 |
| H   | 3.63559700  | -0.03247600 | -0.00000200 |
| C   | -1.87177300 | 1.19363200  | -0.00000100 |
| H   | -2.15462500 | 2.23959900  | -0.00000400 |
| C   | -2.70494400 | 0.13341700  | 0.00000400  |
| H   | -3.78795600 | 0.17735000  | 0.00000400  |
| C   | -1.93682500 | -1.14761700 | 0.00000000  |
| H   | -2.16126300 | -1.76724000 | -0.87963100 |
| H   | -2.16126200 | -1.76724000 | 0.87963100  |
| H   | 0.38749300  | 2.65432800  | -0.00000200 |

|   |            |             |            |
|---|------------|-------------|------------|
| H | 0.31475900 | -2.62993100 | 0.00000200 |
| H | 2.60460200 | -2.12554600 | 0.00000000 |

**Allene 5H M062X/6-31G\***

|   |             |             |             |
|---|-------------|-------------|-------------|
| 1 | 1           |             |             |
| C | -0.66363100 | -0.14054300 | -0.00002300 |
| C | -1.39748200 | 1.08085500  | -0.00004500 |
| C | -2.78763600 | 1.26259900  | -0.00002300 |
| C | -1.15275300 | -1.43338000 | 0.00000900  |
| C | -3.77845700 | 0.29332000  | 0.00000800  |
| C | -2.48721300 | -1.86457300 | 0.00002400  |
| C | -3.64685700 | -1.10301400 | 0.00002400  |
| H | -0.40640400 | -2.22609700 | 0.00002100  |
| H | -4.79961600 | 0.66577900  | 0.00001800  |
| H | -2.63010700 | -2.94199400 | 0.00004100  |
| H | -4.57908200 | -1.66135700 | 0.00004100  |
| C | -0.44630200 | 2.17559300  | -0.00008900 |
| H | -0.73180300 | 3.22082900  | -0.00011300 |
| C | 0.80550400  | 1.67742200  | -0.00009100 |
| H | 1.71106700  | 2.27403600  | -0.00012300 |
| C | 0.81614800  | 0.17593200  | -0.00003400 |
| C | 1.51551100  | -0.38986300 | -1.27063000 |
| H | 1.04220000  | 0.03005700  | -2.16468300 |
| H | 1.35379400  | -1.47534700 | -1.29390400 |
| C | 1.51545300  | -0.38973300 | 1.27066300  |
| H | 1.04209400  | 0.03028100  | 2.16464700  |
| H | 1.35373400  | -1.47521400 | 1.29403900  |
| C | 3.02091200  | -0.11421100 | -1.26112600 |
| H | 3.20537800  | 0.96541800  | -1.33266000 |
| H | 3.46379400  | -0.56187500 | -2.15602800 |
| C | 3.68105100  | -0.67221900 | 0.00008200  |
| C | 3.02085200  | -0.11407900 | 1.26120200  |
| H | 3.20531400  | 0.96555800  | 1.33263000  |
| H | 3.46369200  | -0.56164800 | 2.15617200  |
| H | 4.75010200  | -0.44174700 | 0.00009500  |
| H | 3.59277000  | -1.76717800 | 0.00013800  |
| H | -3.12753200 | 2.29586900  | -0.00003400 |

**Allene 6H M062X/6-31G\***

|   |             |             |             |
|---|-------------|-------------|-------------|
| 1 | 1           |             |             |
| C | -0.67586400 | -0.56836700 | 0.00002200  |
| C | -1.56427200 | 0.55065700  | -0.00004900 |
| C | -1.27469300 | 1.89782300  | -0.00008100 |
| C | 0.71506300  | -0.54413600 | 0.00002000  |
| C | -0.01316600 | 2.52319700  | -0.00005600 |
| C | 1.57501600  | 0.57878900  | -0.00000700 |
| C | 1.24197700  | 1.94738800  | -0.00002000 |
| H | -2.13143600 | 2.56894500  | -0.00012200 |
| H | 2.08527000  | 2.63414900  | -0.00000300 |
| C | -2.97594900 | 0.02032400  | -0.00006200 |

|   |             |             |             |
|---|-------------|-------------|-------------|
| H | -3.53492900 | 0.36700400  | -0.88003500 |
| C | -2.78745700 | -1.46285500 | 0.00004400  |
| H | -3.61180900 | -2.16664000 | 0.00007900  |
| C | -1.48043700 | -1.78390700 | 0.00005100  |
| H | -1.06853800 | -2.78576600 | 0.00009500  |
| C | 1.56688500  | -1.78586200 | 0.00008300  |
| H | 1.36672300  | -2.41201900 | 0.88097400  |
| H | 1.36666900  | -2.41219400 | -0.88066300 |
| C | 2.95118600  | 0.09912500  | 0.00003500  |
| H | 3.81430000  | 0.75406800  | 0.00004700  |
| C | 2.96168400  | -1.24672100 | 0.00000800  |
| H | 3.84285100  | -1.87733300 | 0.00000600  |
| H | -0.03387600 | 3.60989500  | -0.00007000 |
| H | -3.53504500 | 0.36715800  | 0.87977100  |

### Allene 7H M062X/6-31G\*

1 1

|   |             |             |             |
|---|-------------|-------------|-------------|
| C | -1.19849700 | 0.77451900  | -0.00000200 |
| C | -1.47270500 | 2.16763700  | -0.00015000 |
| C | -0.59480800 | 3.26594600  | -0.00029500 |
| C | 0.06024600  | 0.16734300  | 0.00004900  |
| C | 0.78393100  | 3.26112000  | -0.00035100 |
| C | 1.34182000  | 0.81258000  | -0.00008200 |
| C | 1.64975300  | 2.15595000  | -0.00026400 |
| H | -1.07307900 | 4.24284700  | -0.00038300 |
| H | 2.71059700  | 2.39868100  | -0.00034200 |
| C | -2.91446900 | 2.35263200  | -0.00011600 |
| H | -3.39210500 | 3.32545200  | -0.00019700 |
| C | -3.51831400 | 1.15368000  | 0.00002400  |
| H | -4.59022100 | 0.99159300  | 0.00007300  |
| C | -2.52537700 | 0.02555000  | 0.00007600  |
| C | -2.71405700 | -0.82980100 | 1.28808700  |
| H | -2.68024200 | -0.16605200 | 2.15904100  |
| H | -1.87675900 | -1.52716000 | 1.39106500  |
| C | -2.71410400 | -0.82995600 | -1.28782500 |
| H | -2.68031800 | -0.16631200 | -2.15886000 |
| H | -1.87681300 | -1.52732900 | -1.39074800 |
| C | -4.01938000 | -1.62930600 | 1.25992000  |
| H | -4.06667200 | -2.25343300 | 2.15757900  |
| H | -4.88095700 | -0.95141700 | 1.30928400  |
| C | -4.01942700 | -1.62945600 | -1.25952100 |
| H | -4.06675100 | -2.25368600 | -2.15710600 |
| H | -4.88100300 | -0.95156800 | -1.30893400 |
| C | -4.11650100 | -2.49061000 | 0.00025200  |
| H | -3.30091600 | -3.22794600 | 0.00028100  |
| H | -5.05236600 | -3.05681100 | 0.00030300  |
| C | 2.43602700  | -0.23863800 | -0.00000200 |
| C | 0.31379700  | -1.27298700 | 0.00025300  |
| H | -0.45072400 | -2.03579700 | 0.00040700  |
| C | 1.63695400  | -1.50642800 | 0.00022800  |
| H | 2.08917200  | -2.49215000 | 0.00035900  |

|   |            |             |             |
|---|------------|-------------|-------------|
| C | 3.32736300 | -0.13044000 | 1.26839900  |
| H | 2.70220500 | -0.23169500 | 2.16237600  |
| C | 3.32716200 | -0.13080500 | -1.26858100 |
| H | 2.70185800 | -0.23232400 | -2.16242500 |
| C | 4.45490800 | -1.16542400 | -1.26290300 |
| H | 4.03590000 | -2.17719800 | -1.33838700 |
| H | 5.07067200 | -1.02037600 | -2.15600600 |
| C | 4.45510600 | -1.16506400 | 1.26284000  |
| H | 5.07101100 | -1.01976100 | 2.15580500  |
| H | 4.03610600 | -2.17681300 | 1.33867600  |
| C | 5.31009000 | -1.04875900 | -0.00011500 |
| H | 5.82021800 | -0.07577500 | -0.00029500 |
| H | 6.09117600 | -1.81462800 | -0.00006700 |
| H | 3.76917800 | 0.87421600  | 1.29302700  |
| H | 3.76896600 | 0.87384600  | -1.29357200 |
| H | 1.26477200 | 4.23588300  | -0.00048300 |

**Allene 8H M062X/6-31G\***

1 1

|   |             |             |             |
|---|-------------|-------------|-------------|
| C | -0.71512800 | -0.54420100 | 0.00000600  |
| C | -1.57496800 | 0.57885100  | -0.00000700 |
| C | -1.24191600 | 1.94746200  | -0.00003000 |
| C | 0.67583400  | -0.56842100 | 0.00001400  |
| C | 0.01325400  | 2.52326400  | -0.00003900 |
| C | 1.56425900  | 0.55060000  | 0.00000500  |
| C | 1.27469800  | 1.89781400  | -0.00002100 |
| H | 0.03400000  | 3.60995300  | -0.00005700 |
| H | 2.13155300  | 2.56878100  | -0.00002600 |
| C | -2.95116100 | 0.09919700  | -0.00001600 |
| H | -3.81437200 | 0.75399600  | -0.00003400 |
| C | -2.96171300 | -1.24670600 | 0.00002200  |
| H | -3.84296800 | -1.87717100 | 0.00002700  |
| C | -1.56698200 | -1.78587600 | 0.00000100  |
| H | -1.36673600 | -2.41211600 | -0.88082700 |
| H | -1.36673100 | -2.41210800 | 0.88083300  |
| C | 2.97595900  | 0.02028400  | 0.00001000  |
| H | 3.53499700  | 0.36704700  | -0.87991300 |
| H | 3.53499600  | 0.36708000  | 0.87991800  |
| C | 1.48039500  | -1.78394000 | 0.00001500  |
| H | 1.06873700  | -2.78589100 | 0.00000900  |
| C | 2.78747300  | -1.46283300 | 0.00004900  |
| H | 3.61174300  | -2.16670300 | 0.00006300  |
| H | -2.08523300 | 2.63417100  | -0.00004200 |

**Allene 9H M062X/6-31G\***

1 1

|   |             |            |             |
|---|-------------|------------|-------------|
| C | -1.19849700 | 0.77451900 | -0.00001000 |
| C | -1.47270600 | 2.16763700 | -0.00010500 |
| C | 0.06024600  | 0.16734300 | 0.00003500  |
| C | 0.78393100  | 3.26112000 | -0.00023600 |

|   |             |             |             |
|---|-------------|-------------|-------------|
| C | 1.34182000  | 0.81258000  | -0.00004600 |
| C | 1.64975300  | 2.15595000  | -0.00017100 |
| H | 1.26477200  | 4.23588300  | -0.00032100 |
| H | 2.71059700  | 2.39868100  | -0.00021600 |
| C | -2.91447000 | 2.35263200  | -0.00005900 |
| H | -3.39210600 | 3.32545200  | -0.00009600 |
| C | -3.51831400 | 1.15367900  | 0.00004000  |
| H | -4.59022200 | 0.99159300  | 0.00008900  |
| C | -2.52537600 | 0.02555000  | 0.00002900  |
| C | 0.31379700  | -1.27298700 | 0.00020000  |
| H | -0.45072400 | -2.03579600 | 0.00031800  |
| C | 1.63695400  | -1.50642800 | 0.00019000  |
| H | 2.08917200  | -2.49215000 | 0.00029500  |
| C | 4.45506700  | -1.16510800 | 1.26289300  |
| H | 5.07094500  | -1.01983800 | 2.15588200  |
| H | 4.03606700  | -2.17686100 | 1.33868100  |
| C | 5.31009000  | -1.04875900 | -0.00003200 |
| H | 6.09117600  | -1.81462800 | 0.00001300  |
| H | 5.82021800  | -0.07577400 | -0.00016100 |
| C | 4.45494600  | -1.16537900 | -1.26284900 |
| H | 5.07073700  | -1.02029900 | -2.15592900 |
| H | 4.03594000  | -2.17714900 | -1.33838100 |
| C | 3.32732400  | -0.13048600 | 1.26845600  |
| H | 2.70213700  | -0.23177500 | 2.16240800  |
| H | 3.76913600  | 0.87417000  | 1.29313500  |
| C | 3.32720100  | -0.13075900 | -1.26852500 |
| H | 3.76900800  | 0.87389200  | -1.29346500 |
| H | 2.70192500  | -0.23224400 | -2.16239300 |
| C | 2.43602700  | -0.23863800 | 0.00002200  |
| C | -4.01944000 | -1.62938900 | -1.25964000 |
| H | -4.88101700 | -0.95149900 | -1.30900800 |
| H | -4.06677400 | -2.25357100 | -2.15725800 |
| C | -4.01936700 | -1.62937400 | 1.25980000  |
| H | -4.06664900 | -2.25354800 | 2.15742700  |
| H | -4.88094300 | -0.95148700 | 1.30920900  |
| C | -2.71411700 | -0.82988600 | -1.28791700 |
| H | -1.87682800 | -1.52725400 | -1.39089100 |
| H | -2.68034200 | -0.16619500 | -2.15891600 |
| C | -2.71404300 | -0.82986900 | 1.28799500  |
| H | -2.68021800 | -0.16616800 | 2.15898400  |
| H | -1.87674400 | -1.52723400 | 1.39092600  |
| C | -4.11650000 | -2.49061000 | 0.00008700  |
| H | -5.05236500 | -3.05681300 | 0.00011800  |
| H | -3.30091400 | -3.22794500 | 0.00006900  |
| C | -0.59480800 | 3.26594600  | -0.00020000 |
| H | -1.07307900 | 4.24284700  | -0.00025500 |

**Allene 10H M062X/6-31G\***

|     |             |            |             |
|-----|-------------|------------|-------------|
| 1 1 |             |            |             |
| C   | -0.00002800 | 1.55700300 | -0.68148900 |
| C   | 0.00001800  | 1.25037800 | 0.71517900  |

|   |             |             |             |
|---|-------------|-------------|-------------|
| C | 0.00000000  | 0.00000000  | 1.33093500  |
| C | -0.00001800 | 0.70392600  | -1.76280300 |
| C | -0.00001800 | -1.25037800 | 0.71517900  |
| C | 0.00001800  | -0.70392600 | -1.76280300 |
| C | 0.00002800  | -1.55700300 | -0.68148900 |
| H | -0.00000900 | 1.17422400  | -2.74451600 |
| H | 0.00000900  | -1.17422400 | -2.74451600 |
| C | -0.00010000 | 2.50705300  | 1.45119300  |
| H | -0.00017200 | 2.56650500  | 2.53311000  |
| C | 0.00002800  | 3.54117200  | 0.58943800  |
| H | 0.00004700  | 4.59105400  | 0.85870000  |
| C | -0.00002800 | 3.05808900  | -0.82545300 |
| H | -0.88007400 | 3.40698300  | -1.38304300 |
| H | 0.87991500  | 3.40702700  | -1.38316200 |
| C | 0.00002800  | -3.05808900 | -0.82545300 |
| H | -0.87991500 | -3.40702700 | -1.38316200 |
| H | 0.88007400  | -3.40698300 | -1.38304300 |
| C | 0.00010000  | -2.50705300 | 1.45119300  |
| H | 0.00017200  | -2.56650500 | 2.53311000  |
| C | -0.00002800 | -3.54117200 | 0.58943800  |
| H | -0.00004700 | -4.59105400 | 0.85870000  |
| H | 0.00000000  | 0.00000000  | 2.41941400  |

**Allene 11H M062X/6-31G\***

1 1

|   |             |             |             |
|---|-------------|-------------|-------------|
| C | -1.56148900 | 0.00699300  | 0.00000400  |
| C | -1.22248600 | -1.38494100 | -0.00002000 |
| C | 0.03349600  | -1.97635100 | -0.00002500 |
| C | -0.72348000 | 1.09372400  | -0.00000100 |
| C | 1.28055900  | -1.34207900 | 0.00001200  |
| C | 0.70845200  | 1.12126100  | -0.00001200 |
| C | 1.58214500  | 0.04550000  | 0.00001000  |
| C | -2.46758700 | -2.14747800 | -0.00005500 |
| H | -2.50248300 | -3.23052000 | -0.00009200 |
| C | -3.51878200 | -1.31128800 | -0.00001600 |
| H | -4.56272700 | -1.60226600 | -0.00001200 |
| C | -3.06740000 | 0.11789100  | 0.00006500  |
| H | -3.43281000 | 0.66406500  | -0.88022800 |
| H | -3.43274900 | 0.66394900  | 0.88045800  |
| C | 3.08239700  | 0.19866300  | 0.00001400  |
| H | 3.43208400  | 0.75464900  | -0.88099100 |
| H | 3.43212000  | 0.75477300  | 0.88091800  |
| C | 2.54146600  | -2.07735800 | 0.00002500  |
| H | 2.60132100  | -3.15930800 | 0.00001800  |
| C | 3.57293700  | -1.21502400 | 0.00006100  |
| H | 4.62398100  | -1.47898800 | 0.00009600  |
| C | 1.12895200  | 2.52140000  | -0.00008400 |
| H | 2.16334800  | 2.84337500  | -0.00013600 |
| C | 0.05117700  | 3.32278500  | -0.00003300 |
| H | 0.06672100  | 4.40641300  | -0.00006400 |
| C | -1.21518400 | 2.52199500  | 0.00003400  |

|   |             |             |             |
|---|-------------|-------------|-------------|
| H | -1.83605300 | 2.73711800  | -0.88011300 |
| H | -1.83585400 | 2.73708400  | 0.88033600  |
| H | 0.05206200  | -3.06450400 | -0.00006100 |

**Allene 12H M062X/6-31G\***

|   |             |             |             |
|---|-------------|-------------|-------------|
| 1 | 1           |             |             |
| C | -1.59481300 | 0.07737800  | -0.00001000 |
| C | -1.28050800 | -1.29678300 | 0.00005000  |
| C | -0.03941100 | -1.93192900 | 0.00006600  |
| C | -0.69560300 | 1.16777700  | -0.00002300 |
| C | 1.21642900  | -1.35145600 | 0.00002400  |
| C | 0.71278800  | 1.12897600  | -0.00002600 |
| C | 1.56768400  | 0.02428300  | -0.00002000 |
| C | -2.57175300 | -2.07258700 | 0.00009300  |
| H | -2.64401600 | -2.72709100 | 0.87985300  |
| C | -3.61801000 | -1.00742900 | -0.00000400 |
| H | -4.68143300 | -1.21391600 | -0.00002700 |
| C | -3.04939300 | 0.21183600  | -0.00002600 |
| C | 3.02599800  | 0.11702500  | -0.00003100 |
| C | 2.48902600  | -2.15995500 | 0.00002200  |
| H | 2.54847900  | -2.81514800 | 0.87984100  |
| C | 3.56032400  | -1.11719700 | -0.00003400 |
| H | 4.61839600  | -1.35066200 | -0.00005600 |
| H | 2.54844800  | -2.81524700 | -0.87972300 |
| H | -2.64401000 | -2.72736500 | -0.87945400 |
| H | -3.57675000 | 1.15683800  | -0.00006500 |
| H | 3.57569900  | 1.05029300  | -0.00004800 |
| C | -1.11316000 | 2.56822000  | -0.00003600 |
| H | -2.14349600 | 2.89900200  | -0.00003100 |
| C | -0.02988600 | 3.36400600  | -0.00004900 |
| H | -0.03507100 | 4.44731100  | -0.00005900 |
| C | 1.22115000  | 2.54712300  | -0.00004000 |
| H | 1.84639200  | 2.75091500  | 0.88050200  |
| H | 1.84641000  | 2.75090500  | -0.88057000 |
| H | -0.06422100 | -3.02155800 | 0.00010200  |

**Allene 13H M062X/6-31G\***

|   |             |             |             |
|---|-------------|-------------|-------------|
| 1 | 1           |             |             |
| C | 0.66440300  | 2.49536700  | 0.26806900  |
| C | 1.50781600  | 1.44864300  | 0.41336200  |
| C | 1.27670400  | 0.05620500  | 0.06711400  |
| C | -0.66451700 | 2.49531000  | -0.26801400 |
| C | 0.00007300  | -0.53424000 | 0.00003600  |
| C | -1.50783500 | 1.44851200  | -0.41331000 |
| C | -1.27661200 | 0.05610400  | -0.06705900 |
| H | 1.05465600  | 3.46936100  | 0.55061600  |
| H | 2.48373600  | 1.67852100  | 0.82391400  |
| H | -1.05486800 | 3.46927400  | -0.55052900 |
| H | -2.48381700 | 1.67829100  | -0.82378800 |
| N | 2.36708100  | -0.72282300 | -0.07584000 |



|   |             |             |             |
|---|-------------|-------------|-------------|
| N | -2.36703100 | -0.72287600 | 0.07583100  |
| C | 3.72229300  | -0.17141800 | -0.00214300 |
| H | 4.01116200  | 0.05700900  | 1.02935600  |
| H | 4.41782200  | -0.90873100 | -0.39780500 |
| H | 3.80412600  | 0.73039500  | -0.61281600 |
| C | 2.23305100  | -2.15693300 | -0.31284200 |
| H | 1.76696600  | -2.65610200 | 0.54416300  |
| H | 1.63455800  | -2.34649100 | -1.20989800 |
| H | 3.22167400  | -2.58591100 | -0.45945000 |
| C | -3.72214700 | -0.17128500 | 0.00188400  |
| H | -3.80389300 | 0.73064800  | 0.61239400  |
| H | -4.01084900 | 0.05702900  | -1.02968700 |
| H | -4.41784500 | -0.90842100 | 0.39757900  |
| C | -2.23322800 | -2.15699000 | 0.31296500  |
| H | -1.76706000 | -2.65629000 | -0.54391800 |
| H | -1.63493700 | -2.34657400 | 1.21014900  |
| H | -3.22193800 | -2.58581700 | 0.45942200  |
| H | 0.00014600  | -1.61193500 | -0.00000500 |

**Allene 14H M062X/6-31G\***

1 1

|   |             |             |             |
|---|-------------|-------------|-------------|
| C | 0.67040600  | 1.67081600  | 0.16031100  |
| C | 1.58666300  | 0.62175300  | 0.12446800  |
| C | 1.30154600  | -0.76682900 | -0.05406200 |
| C | -0.74212500 | 1.64903300  | 0.00661800  |
| C | 0.00760000  | -1.34533800 | -0.04546600 |
| C | -1.60714900 | 0.58007000  | -0.10831900 |
| C | -1.28496400 | -0.82510600 | 0.01285200  |
| C | 2.97317600  | 1.22872400  | 0.08081600  |
| H | 3.49802200  | 0.92568900  | -0.83627300 |
| C | 2.72169200  | 2.69910300  | 0.13212900  |
| H | 3.51428400  | 3.43744500  | 0.14289800  |
| C | 1.40501900  | 2.93935400  | 0.19762900  |
| H | 0.93137300  | 3.91122500  | 0.25826800  |
| C | -1.52885400 | 2.91908100  | -0.20094000 |
| H | -1.50105800 | 3.55944300  | 0.69219000  |
| H | -1.11783400 | 3.51710600  | -1.02567100 |
| C | -2.94022600 | 1.09118800  | -0.45342700 |
| H | -3.79441800 | 0.46550800  | -0.67466100 |
| C | -2.90662600 | 2.43231000  | -0.50494700 |
| H | -3.73484300 | 3.08468300  | -0.75194600 |
| H | 0.04172500  | -2.42224500 | 0.03775800  |
| H | 3.61653600  | 0.93715400  | 0.91693300  |
| N | -2.33652500 | -1.69302600 | 0.12332000  |
| N | 2.33881400  | -1.64880700 | -0.20524300 |
| C | -2.17456600 | -3.11063600 | -0.16010300 |
| H | -1.69245200 | -3.65194500 | 0.66621700  |
| H | -3.16740500 | -3.53812200 | -0.31430000 |
| H | -1.59692600 | -3.25027700 | -1.07637100 |
| C | 2.13460800  | -2.92930600 | -0.86998000 |
| H | 3.08572300  | -3.23745900 | -1.31045000 |

|   |             |             |             |
|---|-------------|-------------|-------------|
| H | 1.80741400  | -3.71681000 | -0.17621200 |
| H | 1.40370700  | -2.82452300 | -1.67341300 |
| C | 3.56775400  | -1.59068600 | 0.58759100  |
| H | 3.83009800  | -2.61220300 | 0.87513500  |
| H | 4.40826500  | -1.16504100 | 0.03069000  |
| H | 3.40511600  | -1.02670700 | 1.50592700  |
| C | -3.46628800 | -1.41708600 | 1.01490400  |
| H | -4.41744400 | -1.50316100 | 0.48077600  |
| H | -3.45712900 | -2.15041700 | 1.82972400  |
| H | -3.38477000 | -0.42517100 | 1.45580800  |

**Allene 15H M062X/6-31G\***

1 1

|   |             |             |             |
|---|-------------|-------------|-------------|
| C | -1.58240200 | -0.11623300 | 0.22787600  |
| C | -1.24326100 | 1.30233100  | 0.19972400  |
| C | 0.00340300  | 1.91344400  | 0.24547900  |
| C | -0.69835600 | -1.15636800 | 0.51209600  |
| C | 1.26899200  | 1.33232500  | 0.23800700  |
| C | 0.72742300  | -1.11891500 | 0.62066400  |
| C | 1.60686800  | -0.07390400 | 0.30864600  |
| C | -2.44611800 | 2.05317700  | 0.11561200  |
| H | -2.47405500 | 3.13422100  | 0.09594900  |
| C | -3.52422600 | 1.20202000  | 0.03980100  |
| C | -3.03450300 | -0.18134600 | 0.07189400  |
| C | 3.04729000  | -0.15627100 | 0.14636400  |
| C | 2.47216100  | 2.08158900  | 0.16688000  |
| C | 3.54915400  | 1.21992600  | 0.10973400  |
| C | 1.16600100  | -2.41440700 | 1.16194900  |
| H | 2.18071700  | -2.62351400 | 1.47084700  |
| C | 0.12152500  | -3.23393600 | 1.32436000  |
| H | 0.14759800  | -4.23288100 | 1.74243400  |
| C | -1.13200400 | -2.57180600 | 0.85123700  |
| H | -1.93422500 | -2.59487200 | 1.59777200  |
| H | -1.50085500 | -3.09677200 | -0.04058400 |
| C | -3.78259000 | -1.32850800 | -0.11370800 |
| H | -3.24038400 | -2.26468700 | -0.15133100 |
| C | -5.16480800 | -1.48065200 | -0.29254300 |
| C | -6.17524600 | -0.51732300 | -0.32029300 |
| C | -4.89062300 | 1.63785100  | -0.05276600 |
| C | -6.04471400 | 0.88681300  | -0.19975800 |
| H | 2.50773100  | 3.16209200  | 0.12790300  |
| C | 4.92023800  | 1.63001600  | 0.01942500  |
| C | 6.05600900  | 0.85449700  | -0.16311700 |
| C | 3.75092300  | -1.31506300 | -0.13839500 |
| H | 3.16226300  | -2.22332700 | -0.23842700 |
| C | 5.11995500  | -1.48891300 | -0.36277700 |
| C | 6.15171700  | -0.54276200 | -0.35406800 |
| C | 5.33324900  | 3.03271300  | 0.11494100  |
| H | 4.64944600  | 3.85758900  | 0.26949300  |
| C | 6.66860900  | 3.12261600  | 0.00034500  |
| H | 7.25586300  | 4.03188600  | 0.04052300  |

|   |             |             |             |
|---|-------------|-------------|-------------|
| C | 7.41200000  | -1.24031600 | -0.61312700 |
| H | 8.37795900  | -0.75116800 | -0.65712600 |
| C | 7.17983300  | -2.55335100 | -0.78775400 |
| H | 7.92612000  | -3.31106800 | -0.99424100 |
| C | -5.27032200 | 3.05301600  | 0.00018000  |
| H | -4.56806900 | 3.86795600  | 0.11899000  |
| C | -6.60382000 | 3.17136000  | -0.10937400 |
| H | -7.16897300 | 4.09525600  | -0.09797100 |
| C | -7.45493700 | -1.20004900 | -0.51629500 |
| H | -8.41069100 | -0.69254500 | -0.57382600 |
| C | -7.25368100 | -2.52603600 | -0.61436900 |
| H | -8.01825100 | -3.27872200 | -0.76379400 |
| C | -7.22731300 | 1.82011500  | -0.25100400 |
| H | -7.77892100 | 1.72385300  | -1.19670100 |
| H | -7.94759300 | 1.61343200  | 0.55277100  |
| C | -5.79721600 | -2.83797800 | -0.48838500 |
| H | -5.59623000 | -3.51117200 | 0.35650700  |
| H | -5.41188700 | -3.34097100 | -1.38644400 |
| C | 5.71904900  | -2.84322900 | -0.65773900 |
| H | 5.51618600  | -3.56821100 | 0.14240900  |
| H | 5.30853100  | -3.27552500 | -1.58103800 |
| C | 7.25954900  | 1.76295000  | -0.19274900 |
| H | 7.98169200  | 1.51256600  | 0.59683300  |
| H | 7.80082900  | 1.68766200  | -1.14617800 |
| H | -0.01164700 | 3.00255600  | 0.23327500  |

**Allene 16H M062X/6-31G\***

1 1

|   |             |             |             |
|---|-------------|-------------|-------------|
| C | -1.57222200 | 0.35107600  | -0.00001000 |
| C | -1.24222900 | -1.09430900 | -0.00002300 |
| C | 0.01905800  | -1.68670400 | -0.00003200 |
| C | -0.73665200 | 1.41699000  | -0.00000600 |
| C | 1.26066200  | -1.06696500 | -0.00002800 |
| C | 0.72766600  | 1.43892000  | -0.00001000 |
| C | 1.58977500  | 0.37838900  | -0.00001400 |
| C | -2.44310400 | -1.82617100 | -0.00002700 |
| H | -2.48917000 | -2.91042400 | -0.00003600 |
| C | -3.52481700 | -0.93552400 | -0.00001500 |
| C | -3.03065600 | 0.40714900  | -0.00000400 |
| C | 3.04472200  | 0.43518300  | -0.00000900 |
| C | 2.47031300  | -1.80083800 | -0.00004200 |
| H | 2.51728300  | -2.88495100 | -0.00005600 |
| C | 3.53989800  | -0.91142700 | -0.00003000 |
| C | 1.12275700  | 2.84767700  | -0.00000800 |
| H | 2.15010200  | 3.18393100  | -0.00001600 |
| C | 0.04509200  | 3.64477500  | -0.00000200 |
| H | 0.06450400  | 4.72842700  | -0.00000200 |
| C | -1.22733100 | 2.84853100  | 0.00000300  |
| H | -1.84676400 | 3.06150200  | -0.88187900 |
| H | -1.84675200 | 3.06149400  | 0.88189600  |
| C | -4.09313700 | 1.29771000  | 0.00001800  |

|   |             |             |             |
|---|-------------|-------------|-------------|
| H | -4.06713800 | 2.37962500  | 0.00003100  |
| C | 4.12219600  | 1.31496000  | 0.00002500  |
| H | 4.11506400  | 2.39649400  | 0.00004900  |
| C | 5.31627600  | 0.54972300  | 0.00002200  |
| C | 4.96575200  | -0.88101000 | -0.00000700 |
| C | -4.94392000 | -0.89942600 | 0.00000100  |
| C | -5.29463800 | 0.53453900  | 0.00001000  |
| C | 5.80683500  | -1.97592600 | -0.00001800 |
| H | 5.31605600  | -2.94779400 | -0.00004700 |
| C | -5.79506900 | -1.99303200 | -0.00000200 |
| H | -5.30854500 | -2.96708700 | -0.00001500 |
| C | -7.19134800 | -2.01104400 | 0.00000500  |
| H | -7.64891700 | -2.99630000 | 0.00000000  |
| C | -8.07275300 | -0.93407200 | 0.00001500  |
| H | -9.12741400 | -1.19805200 | 0.00001900  |
| C | 7.20849400  | -2.00152200 | 0.00000000  |
| H | 7.65961800  | -2.98977000 | -0.00001400 |
| C | 8.09121500  | -0.93245000 | 0.00003000  |
| H | 9.14527400  | -1.19849200 | 0.00003900  |
| C | 6.60370700  | 1.09965800  | 0.00004700  |
| H | 6.64494600  | 2.18734200  | 0.00006800  |
| C | 7.82540500  | 0.44600100  | 0.00005100  |
| H | 8.70156700  | 1.08819000  | 0.00007300  |
| C | -6.57481800 | 1.08784900  | 0.00001900  |
| H | -6.61212800 | 2.17577000  | 0.00002900  |
| C | -7.80424500 | 0.43822300  | 0.00002200  |
| H | -8.67696200 | 1.08494900  | 0.00003000  |
| H | 0.03207500  | -2.77646100 | -0.00004300 |

**Allene 17H M062X/6-31G\***

|     |             |             |             |
|-----|-------------|-------------|-------------|
| 1 1 |             |             |             |
| C   | -1.57427200 | -0.82399200 | 0.00000000  |
| C   | -1.24441000 | 0.61989500  | -0.00000500 |
| C   | 0.01673800  | 1.20958900  | -0.00000600 |
| C   | -0.73732000 | -1.89007100 | -0.00000100 |
| C   | 1.25956300  | 0.59113500  | -0.00000300 |
| C   | 0.72468000  | -1.91257100 | -0.00000500 |
| C   | 1.58827400  | -0.85287300 | -0.00000500 |
| C   | -2.44979200 | 1.34991300  | -0.00000600 |
| H   | -2.48644200 | 2.43413500  | -0.00001000 |
| C   | -3.53331600 | 0.46369200  | -0.00000200 |
| C   | -3.03009100 | -0.88191700 | 0.00000400  |
| C   | 3.04264400  | -0.91148100 | -0.00001100 |
| C   | 2.47193300  | 1.32301700  | 0.00000800  |
| H   | 2.50814900  | 2.40707700  | 0.00001000  |
| C   | 3.54580000  | 0.43867100  | -0.00000800 |
| C   | 1.11938400  | -3.32257100 | -0.00001200 |
| H   | 2.14692900  | -3.65827200 | -0.00001900 |
| C   | 0.04183400  | -4.11933300 | -0.00000800 |
| H   | 0.06033000  | -5.20297600 | -0.00001100 |

|   |              |             |             |
|---|--------------|-------------|-------------|
| C | -1.22950600  | -3.32074500 | 0.00000100  |
| H | -1.85103400  | -3.53178900 | 0.88118000  |
| H | -1.85104700  | -3.53178800 | -0.88117000 |
| C | -4.08398100  | -1.77605100 | 0.00001800  |
| H | -4.05263600  | -2.85784800 | 0.00002600  |
| C | 4.11072000   | -1.79369700 | -0.00002700 |
| H | 4.09968900   | -2.87527600 | -0.00003500 |
| C | 5.31403500   | -1.03257400 | 0.00000500  |
| C | 4.97540800   | 0.39532800  | -0.00003000 |
| C | -4.95775500  | 0.41277100  | 0.00000600  |
| C | -5.29409000  | -1.01849100 | 0.00001700  |
| C | 5.84194000   | 1.47452800  | -0.00004000 |
| C | 6.59000200   | -1.60479800 | 0.00002000  |
| H | 6.61220000   | -2.69463000 | 0.00002500  |
| C | -5.83418000  | 1.48903200  | 0.00000000  |
| C | -6.56424200  | -1.59503800 | 0.00002900  |
| H | -6.58187000  | -2.68502100 | 0.00003800  |
| C | 7.26021200   | 1.49597600  | -0.00002500 |
| C | 8.13837000   | 0.40751500  | -0.00000300 |
| C | 7.82072500   | -0.97682100 | 0.00001600  |
| C | -7.24840000  | 1.50279200  | 0.00000800  |
| C | -8.12347800  | 0.40716100  | 0.00002300  |
| C | -7.80096900  | -0.97217000 | 0.00003200  |
| C | 9.59869100   | 0.52767500  | 0.00000600  |
| H | 10.13085500  | 1.47048100  | -0.00000300 |
| C | 10.16406200  | -0.69029100 | 0.00002400  |
| H | 11.22750800  | -0.89703200 | 0.00003300  |
| C | -7.68405700  | 2.90490900  | -0.00000600 |
| H | -8.72050800  | 3.21806300  | -0.00000500 |
| C | -6.62090300  | 3.72094000  | -0.00002000 |
| H | -6.64572000  | 4.80360900  | -0.00003200 |
| C | -9.58426000  | 0.52268900  | 0.00002900  |
| H | -10.11987900 | 1.46350900  | 0.00002300  |
| C | -10.14495900 | -0.69767100 | 0.00004800  |
| H | -11.20745900 | -0.90914600 | 0.00005800  |
| C | 9.11547000   | -1.75709700 | 0.00002500  |
| H | 9.19103000   | -2.41014200 | 0.87998900  |
| H | 9.19103700   | -2.41015100 | -0.87993300 |
| C | -9.09120800  | -1.75884300 | 0.00004700  |
| H | -9.16392700  | -2.41232100 | 0.88001000  |
| H | -9.16393900  | -2.41233100 | -0.87990800 |
| C | -5.35233300  | 2.92089100  | -0.00001500 |
| H | -4.73179700  | 3.12839400  | -0.88218000 |
| H | -4.73179500  | 3.12841200  | 0.88214500  |
| C | 5.35309800   | 2.90435600  | -0.00004500 |
| H | 4.73169700   | 3.10923300  | -0.88223000 |
| H | 4.73168800   | 3.10924300  | 0.88213100  |
| C | 7.68634400   | 2.90050500  | -0.00003900 |
| H | 8.72077400   | 3.22025200  | -0.00003500 |
| C | 6.61829100   | 3.71007500  | -0.00004800 |
| H | 6.63748000   | 4.79290900  | -0.00005400 |
| H | 0.03051200   | 2.29966600  | -0.00000600 |

Allene 18H M062X/6-31G\*

1 1

|   |             |             |             |
|---|-------------|-------------|-------------|
| C | -1.57207700 | -0.99414200 | -0.03039500 |
| C | -1.24609600 | 0.45068700  | -0.03554200 |
| C | 0.02386900  | 1.03689000  | -0.03950400 |
| C | -0.73432500 | -2.05743500 | -0.03490700 |
| C | 1.25781300  | 0.41455600  | -0.03729300 |
| C | 0.72804200  | -2.09805200 | -0.04172600 |
| C | 1.59081300  | -1.02397800 | -0.03389400 |
| C | -2.45084900 | 1.17154300  | -0.03578800 |
| H | -2.48968900 | 2.25620100  | -0.04050400 |
| C | -3.53844500 | 0.28218800  | -0.02949100 |
| C | -3.02952900 | -1.05925700 | -0.02566600 |
| C | 3.03200200  | -1.08427700 | -0.02215500 |
| C | 2.48062400  | 1.15160400  | -0.03373400 |
| H | 2.51374300  | 2.23598400  | -0.03528000 |
| C | 3.54442200  | 0.26905100  | -0.02434100 |
| C | 1.11868800  | -3.48198200 | -0.06379800 |
| H | 2.14403900  | -3.81592600 | -0.10323900 |
| C | 0.01906600  | -4.29906600 | -0.05073800 |
| C | -1.24567100 | -3.47814600 | -0.03943800 |
| H | -1.86042200 | -3.68724300 | 0.84693300  |
| H | -1.87378700 | -3.67324700 | -0.91954700 |
| C | -4.08155600 | -1.95696300 | -0.01770700 |
| H | -4.04858800 | -3.03924700 | -0.01196700 |
| C | 4.10421000  | -1.96674400 | -0.00206000 |
| H | 4.09018200  | -3.04853600 | 0.01261500  |
| C | 5.30891000  | -1.21053400 | 0.00619200  |
| C | 4.98365000  | 0.21287600  | -0.00830700 |
| C | -4.96244000 | 0.22367000  | -0.02338200 |
| C | -5.29493300 | -1.20261800 | -0.01506600 |
| C | 5.85270600  | 1.28469200  | -0.00632600 |
| C | 6.59190100  | -1.77794900 | 0.02686900  |
| H | 6.61854400  | -2.86792300 | 0.03846600  |
| C | -5.84797800 | 1.29614600  | -0.02388800 |
| C | -6.56852600 | -1.77364200 | -0.00297100 |
| H | -6.59054400 | -2.86407200 | 0.00451100  |
| C | 7.27197100  | 1.32923100  | 0.00589300  |
| C | 8.15645200  | 0.23590600  | 0.02674000  |
| C | 7.81487800  | -1.14688600 | 0.03473300  |
| C | -7.25659900 | 1.33140200  | -0.01340200 |
| C | -8.14250200 | 0.22691400  | -0.00198000 |
| C | -7.80029300 | -1.14876100 | 0.00196300  |
| C | 9.59402500  | 0.36057600  | 0.05335600  |
| H | 10.12322800 | 1.30256200  | 0.07448900  |
| C | 10.17418600 | -0.87975900 | 0.06159100  |
| C | -7.69702900 | 2.71434000  | -0.00790400 |
| H | -8.73191400 | 3.02466200  | 0.01439100  |
| C | -6.61595800 | 3.54541100  | -0.03048500 |
| C | -9.57748300 | 0.35450900  | 0.01496500  |

|   |              |             |             |
|---|--------------|-------------|-------------|
| H | -10.10732900 | 1.29598300  | 0.03190700  |
| C | -10.15809800 | -0.88811100 | 0.01560300  |
| C | 9.10418300   | -1.93926400 | 0.06378400  |
| H | 9.15971400   | -2.57299500 | 0.95850400  |
| H | 9.18838900   | -2.60142700 | -0.80765200 |
| C | -9.08618900  | -1.94489300 | 0.02030400  |
| H | -9.14866600  | -2.58235700 | 0.91206500  |
| H | -9.16545100  | -2.60326300 | -0.85457700 |
| C | -5.35170200  | 2.72282800  | -0.02845700 |
| H | -4.73428900  | 2.92488800  | -0.91333500 |
| H | -4.73091000  | 2.92168000  | 0.85514600  |
| C | 5.34753700   | 2.70860300  | -0.02734900 |
| H | 4.73712600   | 2.89291100  | -0.92138600 |
| H | 4.71648900   | 2.91766800  | 0.84641100  |
| C | 7.69638200   | 2.71420700  | -0.01342200 |
| H | 8.72875900   | 3.03345100  | -0.02972900 |
| C | 6.60777000   | 3.53744000  | -0.01870400 |
| H | 0.04006900   | 2.12727900  | -0.04258200 |
| N | 0.00142800   | -5.65005200 | -0.02050500 |
| C | 1.26669400   | -6.35308200 | -0.11582100 |
| H | 1.10095700   | -7.41601100 | 0.06599600  |
| H | 1.72778700   | -6.22687400 | -1.10477500 |
| H | 1.95640500   | -5.97322500 | 0.64354000  |
| C | -1.20314200  | -6.40211600 | -0.32237100 |
| H | -1.16905600  | -7.35992300 | 0.20246200  |
| H | -2.08326000  | -5.85878600 | 0.02373000  |
| H | -1.30886700  | -6.59629500 | -1.39850500 |
| N | -11.47636000 | -1.18713900 | -0.01286100 |
| N | -6.59889600  | 4.90448800  | -0.09261200 |
| N | 6.58205400   | 4.89579500  | 0.02152000  |
| N | 11.49460900  | -1.18041500 | 0.03833500  |
| C | -12.42451700 | -0.09397900 | 0.08973400  |
| H | -12.37929200 | 0.39241400  | 1.07378100  |
| H | -12.21013700 | 0.65291800  | -0.68038700 |
| H | -13.43300800 | -0.47740900 | -0.07119900 |
| C | -11.94772900 | -2.52317600 | 0.30470000  |
| H | -11.26611000 | -3.27015500 | -0.10519700 |
| H | -12.03906800 | -2.68452400 | 1.38778000  |
| H | -12.92733800 | -2.67461000 | -0.15345600 |
| C | -7.86953800  | 5.59097000  | 0.02838400  |
| H | -7.72256700  | 6.65591300  | -0.15905300 |
| H | -8.56741600  | 5.20148400  | -0.71850100 |
| H | -8.31487100  | 5.46080300  | 1.02532200  |
| C | -5.40898500  | 5.63722100  | 0.29787900  |
| H | -4.51927000  | 5.15309600  | -0.10982200 |
| H | -5.46108600  | 6.64617200  | -0.11716300 |
| H | -5.29989700  | 5.71339400  | 1.38966500  |
| C | 5.39078800   | 5.61988700  | -0.38109300 |
| H | 5.42957200   | 6.62819800  | 0.03715200  |
| H | 5.29527200   | 5.69819200  | -1.47381900 |
| H | 4.50013500   | 5.12730800  | 0.01385100  |
| C | 7.84910900   | 5.59146000  | -0.08653300 |

|   |             |             |             |
|---|-------------|-------------|-------------|
| H | 8.30837000  | 5.45798600  | -1.07646300 |
| H | 7.69105200  | 6.65642800  | 0.09138800  |
| H | 8.53975800  | 5.21266000  | 0.67242200  |
| C | 11.96297500 | -2.50864100 | 0.39087700  |
| H | 11.28491700 | -3.26497400 | -0.00769900 |
| H | 12.94628900 | -2.67024200 | -0.05599100 |
| H | 12.04590000 | -2.64617900 | 1.47813800  |
| C | 12.43997300 | -0.08596600 | 0.14566700  |
| H | 13.44966700 | -0.46690200 | -0.01464700 |
| H | 12.22530600 | 0.66180300  | -0.62347400 |
| H | 12.39259800 | 0.39925200  | 1.13055600  |

**Allene 19H M062X/6-31G\***

1 1

|   |             |             |             |
|---|-------------|-------------|-------------|
| C | 1.56440500  | 0.93760800  | -0.10999000 |
| C | 1.22685900  | -0.49793200 | -0.08590600 |
| C | 0.00326800  | -1.09727200 | -0.03149000 |
| C | 0.69859100  | 2.01658200  | -0.06963100 |
| C | -1.28158400 | -0.49318600 | 0.02692300  |
| C | -0.71848200 | 2.03235100  | 0.00625100  |
| C | -1.61719700 | 0.95644100  | 0.05134600  |
| C | 2.47964900  | -1.23961200 | -0.13899200 |
| H | 2.51674300  | -2.32413400 | -0.13442200 |
| C | 3.52004400  | -0.36108800 | -0.19356400 |
| C | 2.98664000  | 0.99483900  | -0.18159400 |
| C | -3.02327200 | 1.02323100  | 0.12090100  |
| C | -2.45279200 | -1.22827600 | 0.07730100  |
| H | -2.49444600 | -2.31048900 | 0.07034300  |
| C | -3.54410900 | -0.31342400 | 0.13374100  |
| C | -1.13508500 | 3.43754000  | 0.02740200  |
| H | -2.16556000 | 3.75924200  | 0.07913100  |
| C | -0.06541300 | 4.24563900  | -0.03006100 |
| H | -0.08657300 | 5.32906100  | -0.03059800 |
| C | 1.19628900  | 3.44102200  | -0.09866700 |
| H | 1.86709800  | 3.65406000  | 0.74558000  |
| H | 1.76604900  | 3.65312900  | -1.01442800 |
| C | 4.06174600  | 1.86299500  | -0.25244800 |
| H | 4.04141900  | 2.94671300  | -0.27854400 |
| C | -4.12844000 | 1.93668400  | 0.19407100  |
| H | -4.09788500 | 3.01761000  | 0.22508300  |
| C | -5.29262300 | 1.20798700  | 0.23391500  |
| C | -4.94328200 | -0.26100300 | 0.19525800  |
| C | 4.96450500  | -0.28073000 | -0.25954500 |
| C | 5.27479400  | 1.10319500  | -0.29957900 |
| C | -5.81653600 | -1.33888400 | 0.28037200  |
| C | -6.59480900 | 1.75904000  | 0.32647100  |
| H | -6.62705900 | 2.84621200  | 0.39700700  |
| C | 5.85290300  | -1.37870300 | -0.34632200 |
| C | 6.57641300  | 1.70712000  | -0.40438000 |
| H | 6.57520000  | 2.79146800  | -0.50517100 |
| C | -7.22835700 | -1.37201700 | 0.29527400  |



|   |              |             |             |
|---|--------------|-------------|-------------|
| C | -8.12522800  | -0.27798000 | 0.16943900  |
| C | -7.80080800  | 1.12469400  | 0.29806000  |
| C | 7.24120900   | -1.39782800 | -0.32171400 |
| C | 8.15232800   | -0.29072700 | -0.13787900 |
| C | 7.78810700   | 1.10795800  | -0.34195200 |
| C | -9.52626800  | -0.39540100 | -0.07886200 |
| C | -10.16520000 | 0.87945700  | 0.10320200  |
| C | 7.67207900   | -2.77730300 | -0.58942600 |
| H | 8.70411200   | -3.07647400 | -0.71781700 |
| C | 6.60368900   | -3.58273300 | -0.71208300 |
| H | 6.62240400   | -4.64393300 | -0.92789000 |
| C | 9.50758100   | -0.38401700 | 0.17543700  |
| C | 10.15052100  | 0.90702700  | 0.00062900  |
| C | -9.09359500  | 1.90547500  | 0.35193000  |
| H | -9.23406200  | 2.38478300  | 1.32948900  |
| H | -9.13857600  | 2.69980900  | -0.40313400 |
| C | 9.07655100   | 1.89873900  | -0.38553800 |
| H | 9.05338700   | 2.76002100  | 0.29068900  |
| H | 9.26060500   | 2.28631500  | -1.39578700 |
| C | 5.35003900   | -2.78663200 | -0.54120500 |
| H | 4.68974800   | -2.86836800 | -1.41532700 |
| H | 4.76793100   | -3.12258000 | 0.32917600  |
| C | -5.30218500  | -2.75409800 | 0.40165300  |
| H | -4.74795700  | -3.05136200 | -0.49979900 |
| H | -4.60910400  | -2.86248500 | 1.24628100  |
| C | -7.62657500  | -2.76707500 | 0.53155500  |
| H | -8.64224900  | -3.09382900 | 0.71154600  |
| C | -6.54547000  | -3.56115900 | 0.59261300  |
| H | -6.55062800  | -4.62672700 | 0.78750600  |
| C | -10.17648200 | -1.54373800 | -0.62401200 |
| H | -9.51804800  | -2.32947500 | -0.97840200 |
| C | 10.15823000  | -1.53680900 | 0.75907600  |
| H | 9.48952500   | -2.32451800 | 1.09383100  |
| C | 11.47598500  | -1.74287300 | 1.00363600  |
| H | 11.72206300  | -2.69374000 | 1.47072200  |
| C | 12.60994300  | -0.88763200 | 0.74941100  |
| H | 13.58148600  | -1.33730300 | 0.93455600  |
| C | -11.51493100 | -1.77551100 | -0.80165800 |
| H | -11.76343100 | -2.74063600 | -1.23661700 |
| C | -12.63310100 | -0.95021700 | -0.50091700 |
| H | -13.60754500 | -1.40659900 | -0.64938300 |
| C | -11.49669900 | 1.20130400  | 0.10369400  |
| H | -11.72741000 | 2.24266100  | 0.32025100  |
| C | -12.62130700 | 0.36102300  | -0.10788600 |
| H | -13.58958300 | 0.83568700  | 0.02659500  |
| C | 11.46083700  | 1.24880100  | 0.07872600  |
| H | 11.69583400  | 2.28919100  | -0.13797000 |
| C | 12.59732900  | 0.41114900  | 0.36271800  |
| H | 13.56347000  | 0.89968300  | 0.26380900  |
| H | -0.00117100  | -2.18723000 | -0.03053400 |

- 
1. A. D. Becke, *J. Chem. Phys.* **1993**, *98*, 1372-1377; C. Lee, W. Yang, R. G. Parr, *Phys. Rev. B* **1988**, *37*, 785-789.
  2. Y. Zhao, N. E. Schultz, and D. G. Truhlar, *J. Chem. Theory and Comput.* **2006**, *2*, 364-382.
  3. Y. Zhao and D. G. Truhlar, *Theor. Chem. Acc.* **2008**, *120*, 215-241.
  4. *Gaussian 03*, Revision B.03, M. J. Frisch, G. W. Trucks, H. B. Schlegel, G. E. Scuseria, M. A. Robb, J. R. Cheeseman, J. A. Montgomery, Jr., T. Vreven, K. N. Kudin, J. C. Burant, J. M. Millam, S. S. Iyengar, J. Tomasi, V. Barone, B. Mennucci, M. Cossi, G. Scalmani, N. Rega, G. A. Petersson, H. Nakatsuji, M. Hada, M. Ehara, K. Toyota, R. Fukuda, J. Hasegawa, M. Ishida, T. Nakajima, Y. Honda, O. Kitao, H. Nakai, M. Klene, X. Li, J. E. Knox, H. P. Hratchian, J. B. Cross, C. Adamo, J. Jaramillo, R. Gomperts, R. E. Stratmann, O. Yazyev, A. J. Austin, R. Cammi, C. Pomelli, J. W. Ochterski, P. Y. Ayala, K. Morokuma, G. A. Voth, P. Salvador, J. J. Dannenberg, V. G. Zakrzewski, S. Dapprich, A. D. Daniels, M. C. Strain, O. Farkas, D. K. Malick, A. D. Rabuck, K. Raghavachari, J. B. Foresman, J. V. Ortiz, Q. Cui, A. G. Baboul, S. Clifford, J. Cioslowski, B. B. Stefanov, G. Liu, A. Liashenko, P. Piskorz, I. Komaromi, R. L. Martin, D. J. Fox, T. Keith, M. A. Al-Laham, C. Y. Peng, A. Nanayakkara, M. Challacombe, P. M. W. Gill, B. Johnson, W. Chen, M. W. Wong, C. Gonzalez, J. A. Pople, Gaussian Inc., Wallingford CT, **2004**.
  5. B. Kovačević, Z. B. Maksić, *Chem. Commun.* **2006**, 1524-1526.
  6. L. Sleno, D. A. Volmer, B. Kovačević, Z. B. Maksić, *J. Am. Soc. Mass. Spectrom.* **2004**, *15*, 462-477.
  7. S. Miertuš, E. Scrocco, J. Tomasi, *J. Chem. Phys.* **1981**, *55*, 117-129; S. Miertuš, J. Tomasi, *J. Chem. Phys.* **1982**, *65*, 239-245.
  8. J. B. Foresman, T. A. Keith, K. B. Wiberg, J. Snoonian, M. J. Frisch, *J. Phys. Chem.* **1996**, *100*, 16098-16104.
  9. B. Kovačević, Z. B. Maksić, *Org. Lett.* **2001**, *3*, 1523-1526.
  10. I. Despotović, B. Kovačević, Z. B. Maksić, *New J. Chem.* **2007**, *31*, 447-457.
